# Supplementary material for: Global Burden, Risk Factors, and Trends of Esophageal Cancer: An Analysis of Cancer Registries from 48 Countries
Source: PubMed Central journal article supplement (PMC7795486; doi:10.3390/cancers13010141), 2021-01-05
Supplement: cancers-13-00141-s001.pdf [file cancers-13-00141-s001.pdf]

## **Supplementary Materials**

**Table S1.** The data source of the analysis of esophageal cancer

**Table S2.** The data source of the analysis of esophageal cancer

**Table S3.** The incidence and mortality of esophageal cancer by region

**Table S4.** The incidence of esophageal cancer by histological subtype

**Table S5.** The trend analysis of esophageal cancer by country

**Figure S1.** The incidence and mortality trends of esophageal cancer

**Figure S2.** The joinpoint regression analysis of esophageal cancer

**Figure S3.** The AAPC of the incidence of esophageal cancer in individuals aged < 50 years

**Table S1. The data source of the analysis of esophageal cancer**

|                | <b>Incidence</b>             | <b>Mortality</b>    |
|----------------|------------------------------|---------------------|
| Australia      | CI5 (1993-2012)              | WHO (1979-2015)     |
| Austria        | CI5 (1998-2012)              | WHO (1980-2016)     |
| Bahrain        | CI5 (1998-2012)              | WHO (1997-2014)     |
| Belarus        | CI5 (1983-2012)              | WHO (1981-2001)     |
| Belgium        | n/a                          | WHO(1979-2015)      |
| Brazil         | CI5 (1993-2012) <sup>1</sup> | WHO (1979-2015)     |
| Bulgaria       | CI5 (1998-2012)              | WHO (1980-2014)     |
| Canada         | CI5 (1983-2012) <sup>2</sup> | WHO (1979-2013)     |
| Chile          | CI5 (1998-2012) <sup>3</sup> | WHO (1980-2015)     |
| China          | CI5 (1998-2012) <sup>4</sup> | n/a                 |
| Colombia       | CI5 (1983-2012) <sup>5</sup> | WHO (1984-2015)     |
| Costa Rica     | CI5 (1982-2011)              | WHO (1980-2014)     |
| Croatia        | CI5 (1988-2012)              | WHO (1985-2016)     |
| Cyprus         | CI5 (1998-2012)              | WHO (2004-2016)     |
| Czech Republic | CI5 (1983-2012)              | WHO (1986-2016)     |
| Denmark        | NORDCAN (1943-2016)          | NORDCAN (1951-2016) |
| Ecuador        | CI5 (1985-2012) <sup>6</sup> | WHO (1979-2015)     |
| Estonia        | CI5 (1983-2012)              | WHO (1981-2015)     |
| Faroe Islands  | NORDCAN (1960-2015)          | NORDCAN (1983-2013) |
| Finland        | NORDCAN (1953-2016)          | NORDCAN (1953-2016) |
| France         | CI5 (1998-2011) <sup>7</sup> | WHO (1979-2014)     |
| Germany        | CI5 (1998-2012) <sup>8</sup> | WHO (1990-2015)     |

|                    |                               |                               |
|--------------------|-------------------------------|-------------------------------|
| Greenland          | NORDCAN (1968-2016)           | NORDCAN (1983-2016)           |
| Hong Kong          | CI5 (1983-2012)               | WHO (1979-2015)               |
| Iceland            | NORDCAN (1955-2016)           | NORDCAN (1955-2016)           |
| India              | CI5(1983-2012) <sup>9</sup>   | n/a                           |
| Ireland            | CI5 (1994-2012)               | WHO (1979-2014)               |
| Israel             | CI5 (1963-2012)               | WHO (1979-2015)               |
| Italy              | CI5 (1998-2010) <sup>10</sup> | WHO (1979-2015)               |
| Japan              | CI5 (1998-2010) <sup>11</sup> | WHO (1979-2015)               |
| Korea              | CI5 (1999-2012) <sup>12</sup> | WHO (1985-2015) <sup>13</sup> |
| Kuwait             | CI5 (1998-2012)               | WHO (1979-2014)               |
| Latvia             | n/a                           | WHO (1980-2015)               |
| Lithuania          | CI5 (1988-2012)               | WHO (1981-2016)               |
| Malta              | CI5 (1993-2012)               | WHO(1979-2015)                |
| Netherlands        | CI5 (1989-2012)               | WHO (1979-2016)               |
| New Zealand        | CI5 (1983-2012)               | WHO (1979-2013)               |
| Norway             | NORDCAN (1953-2016)           | NORDCAN (1953-2016)           |
| Philippines        | CI5 (1983-2012) <sup>14</sup> | WHO (1992-2011)               |
| Poland             | CI5 (1998-2012) <sup>15</sup> | WHO (1980-2015)               |
| Portugal           | n/a                           | WHO (1980-2014)               |
| Russian Federation | n/a                           | WHO (1980-1998)               |
| Singapore          | n/a                           | WHO (1979-2015)               |
| Slovakia           | CI5 (1971-2010)               | WHO (1992-2014)               |
| Slovenia           | CI5 (1983-2012)               | WHO (1985-2015)               |
| Spain              | CI5 (1993-2010) <sup>16</sup> | WHO (1980-2015)               |

|                |                               |                               |
|----------------|-------------------------------|-------------------------------|
| Sweden         | NORDCAN (1960-2016)           | NORDCAN (1960-2016)           |
| Switzerland    | CI5 (1998-2012) <sup>17</sup> | WHO (1995-2015)               |
| Thailand       | CI5 (1993-2012) <sup>18</sup> | WHO (1979-2016)               |
| Turkey         | CI5 (1998-2012) <sup>19</sup> | WHO (2009-2015)               |
| Uganda         | CI5 (1993-2012) <sup>20</sup> | n/a                           |
| United Kingdom | CI5 (1995-2012) <sup>21</sup> | WHO (1979-2015)               |
| USA            | SEER(1975-2017) <sup>22</sup> | SEER(1970-2017) <sup>22</sup> |
| USA Black      | SEER(1975-2017) <sup>22</sup> | n/a                           |
| USA White      | SEER(1975-2017) <sup>22</sup> | n/a                           |

n/a” not available; CI5: Cancer Incidence in Five Continents V; NORDCAN: Nordic Cancer Registries’ SEER: USA: National Institutes of Health (NIH); WHO: World Health Organization

1. Brazil, Goiania
2. Canada (excl. Nunavut, Quebec and Yukon)
3. Chile, Valdivia
4. China (5 registries)
5. Colombia, Cali
6. Ecuador, Quito
7. France (9 registries)
8. Germany (2 registries)
9. India, Chennai
10. Italy (8 registries)
11. Japan (4 registries)

12. Korea (5 registries)
13. Republic of Korea
14. Philippines, Manila
15. Poland, Kielce
16. Spain (9 registries)
17. Switzerland (6 registries)
18. Thailand (4 registries)
19. Turkey (2 registries)
20. Uganda, Kampala
21. UK, England
22. USA, ( 9 registries)

**Reference:**

- a. CI5: [http://ci5.iarc.fr/CI5plus/Pages/table1\\_sel.aspx](http://ci5.iarc.fr/CI5plus/Pages/table1_sel.aspx)
- b. NORDCAN: <http://www-dep.iarc.fr/NORDCAN/english/frame.asp>
- c. SEER: <http://seer.cancer.gov/data/seerstat/>
- d. WHO: <http://apps.who.int/healthinfo/statistics/mortality/whodpms/>

**Table S2. The data source of the analysis of esophageal cancer**

| <b>Risk factors</b>              | <b>Measurement</b>                                                                        | <b>Year</b> |
|----------------------------------|-------------------------------------------------------------------------------------------|-------------|
| Smoking <sup>a</sup>             | Current smoking of any tobacco product (age-standardized rate)                            | 2010        |
| Alcohol <sup>b</sup>             | Total per capita consumption                                                              | 2010        |
| Physical inactivity <sup>c</sup> | Prevalence of insufficient physical activity (age-standardized rate)                      | 2016*       |
| Obesity <sup>d</sup>             | Prevalence of obesity (age-standardized rate)                                             | 2010        |
| Diabetes <sup>e</sup>            | Raised fasting blood glucose ( $\geq 7.0$ mmol/L or on medication, age-standardized rate) | 2010        |
| High cholesterol <sup>f</sup>    | Raised total cholesterol ( $\geq 6.2$ mmol/L, age-standardized)                           | 2008*       |

\*Data are only available for this year.

## Reference

- a. <https://www.who.int/data/gho/indicator-metadata-registry/imr-details/346>
- b. <https://www.who.int/data/gho/indicator-metadata-registry/imr-details/4759>
- c. <https://apps.who.int/gho/data/node.main.A893?lang=en>
- d. <https://apps.who.int/gho/data/node.main.BMIOBESITYA?lang=en>
- e. <https://apps.who.int/gho/data/node.main.NCDRGLUCA?lang=en>
- f. <https://apps.who.int/gho/data/node.main.A887?lang=en>

**Table S3. The incidence and mortality of esophageal cancer by region**

| Region                     | Incidence  |      |           |      |           |     | Mortality  |      |         |      |         |     |
|----------------------------|------------|------|-----------|------|-----------|-----|------------|------|---------|------|---------|-----|
|                            | Both sexes |      | Males     |      | Females   |     | Both sexes |      | Males   |      | Females |     |
|                            | New cases  | ASR  | New cases | ASR  | New cases | ASR | Deaths     | ASR  | Deaths  | ASR  | Deaths  | ASR |
| Eastern Africa             | 17 792     | 8.3  | 9 657     | 9.7  | 8 135     | 7.1 | 17 564     | 8.2  | 9 574   | 9.7  | 7 990   | 7.0 |
| Middle Africa              | 1 564      | 1.9  | 855       | 2.1  | 709       | 1.7 | 1 450      | 1.8  | 772     | 2.0  | 678     | 1.7 |
| Northern Africa            | 3 093      | 1.5  | 1 627     | 1.7  | 1 466     | 1.4 | 2 900      | 1.5  | 1 509   | 1.6  | 1 391   | 1.3 |
| Southern Africa            | 3 913      | 7.4  | 2 331     | 11.1 | 1 582     | 5.0 | 3 793      | 7.2  | 2 297   | 11.0 | 1 496   | 4.8 |
| Western Africa             | 2 132      | 1.2  | 1 358     | 1.6  | 774       | 0.8 | 1 996      | 1.2  | 1 292   | 1.6  | 704     | 0.8 |
| Caribbean                  | 1 882      | 3.3  | 1 488     | 5.6  | 394       | 1.2 | 1 645      | 2.8  | 1 315   | 4.9  | 330     | 1.0 |
| Central America            | 1 756      | 1.0  | 1 289     | 1.6  | 467       | 0.5 | 1 661      | 0.9  | 1 257   | 1.5  | 404     | 0.4 |
| South America              | 17 337     | 3.3  | 12 673    | 5.5  | 4 664     | 1.5 | 14 588     | 2.8  | 10 935  | 4.7  | 3 653   | 1.2 |
| North America              | 22 689     | 3.3  | 18 052    | 5.6  | 4 637     | 1.2 | 18 222     | 2.5  | 14 564  | 4.3  | 3 658   | 0.9 |
| Eastern Asia               | 335 080    | 12.2 | 237 160   | 17.9 | 97 920    | 6.8 | 300 878    | 10.7 | 212 430 | 15.8 | 88 448  | 5.9 |
| South-Eastern Asia         | 12 864     | 1.9  | 10 418    | 3.3  | 2 446     | 0.7 | 11 857     | 1.8  | 9 614   | 3.1  | 2 243   | 0.6 |
| South-Central Asia         | 92 741     | 5.3  | 58 395    | 6.7  | 34 346    | 3.8 | 81 432     | 4.6  | 53 404  | 6.2  | 28 028  | 3.1 |
| Western Asia               | 3 912      | 1.7  | 2 055     | 1.9  | 1 857     | 1.5 | 3 578      | 1.5  | 1 924   | 1.8  | 1 654   | 1.3 |
| Central and Eastern Europe | 15 616     | 3.0  | 12 723    | 5.9  | 2 893     | 0.8 | 14 140     | 2.7  | 11 631  | 5.3  | 2 509   | 0.7 |
| Western Europe             | 17 980     | 4.2  | 13 732    | 6.8  | 4 248     | 1.7 | 14 423     | 3.1  | 11 177  | 5.2  | 3 246   | 1.2 |
| Southern Europe            | 6 449      | 1.9  | 5 153     | 3.3  | 1 296     | 0.6 | 5 644      | 1.5  | 4 545   | 2.8  | 1 099   | 0.5 |
| Northern Europe            | 12 919     | 5.5  | 9 059     | 8.5  | 3 860     | 2.7 | 10 854     | 4.3  | 7 579   | 6.7  | 3 275   | 2.1 |
| Australia and New Zealand  | 2 048      | 3.5  | 1 492     | 5.5  | 556       | 1.6 | 1 708      | 2.7  | 1 201   | 4.2  | 507     | 1.3 |
| Melanesia                  | 238        | 3.4  | 155       | 4.9  | 83        | 2.2 | 227        | 3.3  | 147     | 4.8  | 80      | 2.1 |
| Polynesia                  | 17         | 2.5  | 17        | 5.0  | NA        | NA  | 13         | 1.9  | 13      | 3.9  | NA      | NA  |
| Micronesia                 | 12         | 2.2  | 10        | 3.8  | 2         | 0.8 | 12         | 2.2  | 10      | 3.8  | 2       | 0.8 |
| World                      | 572 034    | 6.3  | 399 699   | 9.3  | 172 335   | 3.5 | 508 585    | 5.5  | 357 190 | 8.3  | 151 395 | 3.0 |

ASR, age-standardized rate; NA, not available.

**Table S4. The incidence of esophageal cancer by histological subtype**

| Country            | Male |      |      |       |                 | Female |     |      |      |                 |
|--------------------|------|------|------|-------|-----------------|--------|-----|------|------|-----------------|
|                    | AC   |      | SCC  |       | AC:SCC<br>(ASR) | AC     |     | SCC  |      | AC:SCC<br>(ASR) |
|                    | ASR  | N    | ASR  | N     |                 | ASR    | N   | ASR  | N    |                 |
| Afghanistan        | 1.1  | 79   | 8.6  | 670   | 0.124           | 0.5    | 36  | 6.3  | 527  | 0.071           |
| Albania            | 0.4  | 12   | 1.2  | 33    | 0.308           | 0.0    | 2   | 0.2  | 6    | 0.200           |
| Algeria            | 0.3  | 54   | 0.6  | 118   | 0.500           | 0.1    | 20  | 0.6  | 129  | 0.154           |
| Angola             | 0.2  | 10   | 3.4  | 203   | 0.051           | 0.1    | 5   | 1.6  | 119  | 0.061           |
| Argentina          | 1.8  | 477  | 3.7  | 1028  | 0.476           | 0.4    | 169 | 1.5  | 625  | 0.235           |
| Armenia            | 0.6  | 11   | 1.2  | 24    | 0.467           | 0.1    | 2   | 0.5  | 15   | 0.200           |
| Australia          | 3.5  | 790  | 1.9  | 439   | 1.789           | 0.5    | 132 | 1.0  | 316  | 0.455           |
| Austria            | 1.8  | 155  | 2.7  | 223   | 0.667           | 0.3    | 33  | 0.7  | 69   | 0.400           |
| Azerbaijan         | 2.1  | 99   | 4.8  | 218   | 0.452           | 0.7    | 39  | 3.8  | 238  | 0.179           |
| Bahamas            | 0.8  | 2    | 2.8  | 7     | 0.286           | 0.1    | 0   | 0.3  | 1    | 0.250           |
| Bahrain            | 0.9  | 3    | 0.4  | 2     | 2.143           | 0.3    | 1   | 0.9  | 3    | 0.300           |
| Bangladesh         | 2.0  | 1426 | 16.7 | 12057 | 0.121           | 0.7    | 472 | 10.0 | 6951 | 0.067           |
| Barbados           | 0.5  | 2    | 1.5  | 4     | 0.320           | 0.1    | 1   | 0.3  | 1    | 0.400           |
| Belarus            | 0.9  | 64   | 7.0  | 459   | 0.136           | 0.1    | 13  | 0.3  | 32   | 0.333           |
| Belgium            | 3.4  | 390  | 3.7  | 398   | 0.897           | 0.7    | 103 | 1.6  | 206  | 0.429           |
| Belize             | 0.4  | 1    | 1.2  | 2     | 0.281           | NA     | NA  | NA   | NA   | 0.250           |
| Benin              | 0.5  | 6    | 6.5  | 184   | 0.077           | 0.0    | 0   | 4.6  | 148  | 0.000           |
| Bhutan             | 0.8  | 3    | 6.6  | 23    | 0.121           | 0.4    | 1   | 5.7  | 17   | 0.067           |
| Bolivia            | 0.5  | 26   | 1.8  | 85    | 0.300           | 0.2    | 8   | 0.5  | 28   | 0.333           |
| Bosnia Herzegovina | 0.9  | 32   | 3.1  | 92    | 0.308           | 0.1    | 6   | 0.6  | 21   | 0.200           |
| Botswana           | 0.6  | 4    | 11.2 | 69    | 0.056           | 0.2    | 2   | 3.4  | 30   | 0.050           |
| Brazil             | 1.5  | 1675 | 5.9  | 6981  | 0.247           | 0.4    | 611 | 1.4  | 2138 | 0.286           |
| Brunei             | 0.0  | 0    | 3.2  | 5     | 0.000           | NA     | NA  | NA   | NA   | 0.091           |



|                          |     |      |      |        |       |     |      |     |       |       |
|--------------------------|-----|------|------|--------|-------|-----|------|-----|-------|-------|
| Bulgaria                 | 1.0 | 63   | 2.2  | 142    | 0.429 | 0.1 | 15   | 0.4 | 29    | 0.333 |
| Burkina Faso             | 0.1 | 4    | 1.4  | 60     | 0.050 | 0.0 | 2    | 0.9 | 52    | 0.034 |
| Burundi                  | 0.8 | 17   | 14.0 | 342    | 0.056 | 0.3 | 7    | 5.7 | 154   | 0.051 |
| Cambodia                 | 0.2 | 10   | 4.4  | 213    | 0.051 | 0.1 | 3    | 0.9 | 62    | 0.083 |
| Cameroon                 | 0.1 | 3    | 1.0  | 68     | 0.071 | 0.0 | 2    | 1.4 | 93    | 0.025 |
| Canada                   | 3.7 | 1344 | 1.8  | 691    | 2.000 | 0.5 | 216  | 0.8 | 368   | 0.571 |
| Central African Republic | 0.1 | 1    | 1.9  | 23     | 0.074 | 0.1 | 1    | 2.3 | 33    | 0.059 |
| Chad                     | 0.1 | 4    | 2.2  | 65     | 0.050 | 0.1 | 3    | 1.7 | 56    | 0.071 |
| Chile                    | 0.5 | 62   | 2.6  | 350    | 0.171 | 0.3 | 54   | 1.6 | 318   | 0.200 |
| China                    | 0.9 | 9488 | 18.8 | 204602 | 0.046 | 0.4 | 3737 | 7.8 | 89532 | 0.048 |
| Colombia                 | 0.9 | 247  | 1.6  | 407    | 0.579 | 0.1 | 52   | 0.7 | 216   | 0.222 |
| Comoros                  | 0.5 | 1    | 8.1  | 18     | 0.059 | 0.3 | 1    | 6.8 | 15    | 0.045 |
| Congo, Democratic        | 0.1 | 22   | 1.9  | 415    | 0.059 | 0.1 | 16   | 1.7 | 352   | 0.045 |
| Congo, Republic of       | 0.0 | 0    | 0.5  | 7      | 0.071 | 0.0 | 0    | 0.9 | 13    | 0.000 |
| Costa Rica               | 0.8 | 26   | 1.2  | 41     | 0.667 | 0.2 | 7    | 0.5 | 23    | 0.500 |
| Cote d'Ivoire            | 0.0 | 2    | 0.5  | 32     | 0.067 | 0.0 | 2    | 1.1 | 53    | 0.040 |
| Croatia                  | 0.7 | 26   | 3.5  | 135    | 0.200 | 0.1 | 10   | 0.7 | 36    | 0.200 |
| Cuba                     | 2.1 | 215  | 7.4  | 744    | 0.283 | 0.3 | 34   | 0.9 | 117   | 0.308 |
| Cyprus                   | 1.0 | 8    | 0.7  | 7      | 1.333 | 0.3 | 3    | 0.4 | 4     | 0.667 |
| Czech Republic           | 2.5 | 235  | 3.8  | 357    | 0.647 | 0.4 | 50   | 0.8 | 100   | 0.429 |
| Denmark                  | 4.6 | 286  | 3.6  | 206    | 1.292 | 0.9 | 63   | 1.6 | 115   | 0.533 |
| Djibouti                 | 0.2 | 1    | 2.7  | 9      | 0.056 | 0.2 | 1    | 4.2 | 14    | 0.053 |
| Dominican Republic       | 0.7 | 35   | 2.3  | 114    | 0.308 | 0.3 | 14   | 0.8 | 45    | 0.333 |
| Ecuador                  | 0.4 | 38   | 1.5  | 128    | 0.273 | 0.2 | 21   | 0.3 | 32    | 0.667 |
| Egypt                    | 0.3 | 106  | 1.3  | 474    | 0.217 | 0.2 | 86   | 0.9 | 368   | 0.250 |
| El Salvador              | 0.4 | 16   | 1.4  | 47     | 0.313 | 0.1 | 8    | 0.6 | 30    | 0.200 |
| Equatorial Guinea        | 0.1 | 0    | 2.2  | 8      | 0.048 | 0.0 | 0    | 1.5 | 4     | 0.000 |

|                          |     |      |     |      |       |     |     |     |      |       |
|--------------------------|-----|------|-----|------|-------|-----|-----|-----|------|-------|
| Eritrea                  | 0.2 | 2    | 3.1 | 42   | 0.053 | 0.2 | 3   | 4.3 | 61   | 0.044 |
| Estonia                  | 0.5 | 6    | 5.3 | 55   | 0.100 | 0.1 | 1   | 0.6 | 14   | 0.200 |
| Eswatini                 | 0.3 | 1    | 4.6 | 14   | 0.055 | 0.0 | 0   | 1.1 | 5    | 0.034 |
| Ethiopia                 | 0.1 | 26   | 2.1 | 581  | 0.053 | 0.2 | 47  | 3.6 | 1098 | 0.045 |
| Fiji                     | 0.4 | 2    | 2.8 | 12   | 0.154 | NA  | NA  | NA  | NA   | NA    |
| Finland                  | 1.8 | 105  | 1.8 | 108  | 1.000 | 0.3 | 28  | 0.8 | 67   | 0.375 |
| France (metropolitan)    | 1.7 | 1152 | 4.8 | 3032 | 0.364 | 0.3 | 285 | 1.3 | 943  | 0.214 |
| France, Guadeloupe       | 1.4 | 5    | 4.8 | 18   | 0.289 | 0.2 | 2   | 0.6 | 3    | 0.286 |
| France, La Reunion       | 0.4 | 3    | 8.3 | 51   | 0.051 | 0.0 | 0   | 1.3 | 9    | 0.000 |
| France, Martinique       | 0.9 | 4    | 3.2 | 13   | 0.286 | 0.1 | 1   | 0.5 | 3    | 0.250 |
| France, New Caledonia    | 0.7 | 1    | 4.7 | 9    | 0.149 | NA  | NA  | NA  | NA   | NA    |
| French Guyana            | 1.4 | 1    | 4.8 | 6    | 0.292 | NA  | NA  | NA  | NA   | NA    |
| French Polynesia         | 0.9 | 2    | 6.0 | 11   | 0.146 | NA  | NA  | NA  | NA   | NA    |
| Gabon                    | 0.1 | 2    | 3.5 | 24   | 0.034 | 0.1 | 1   | 1.6 | 11   | 0.067 |
| Gaza Strip and West Bank | 0.3 | 3    | 0.6 | 8    | 0.429 | 0.1 | 1   | 0.5 | 6    | 0.154 |
| Georgia                  | 0.5 | 17   | 1.3 | 37   | 0.400 | 0.1 | 3   | 0.4 | 18   | 0.125 |
| Germany                  | 2.1 | 1952 | 4.5 | 3992 | 0.468 | 0.4 | 457 | 1.3 | 1435 | 0.273 |
| Ghana                    | 0.1 | 9    | 3.3 | 215  | 0.044 | 0.1 | 5   | 0.9 | 77   | 0.059 |
| Greece                   | 0.5 | 53   | 1.4 | 156  | 0.333 | 0.1 | 14  | 0.2 | 42   | 0.500 |
| Guam                     | 0.5 | 1    | 3.2 | 3    | 0.160 | NA  | NA  | NA  | NA   | NA    |
| Guatemala                | 0.4 | 22   | 1.2 | 71   | 0.313 | 0.2 | 12  | 0.6 | 41   | 0.333 |
| Guinea                   | 0.1 | 1    | 0.7 | 22   | 0.125 | 0.0 | 0   | 0.1 | 4    | 0.000 |
| Guinea-Bissau            | 0.0 | 0    | 3.0 | 10   | 0.000 | NA  | NA  | NA  | NA   | NA    |
| Guyana                   | 0.3 | 1    | 0.8 | 3    | 0.316 | 0.1 | 0   | 0.4 | 2    | 0.250 |
| Haiti                    | 0.5 | 19   | 1.9 | 71   | 0.278 | 0.5 | 24  | 1.8 | 77   | 0.300 |
| Honduras                 | 0.4 | 11   | 1.1 | 38   | 0.333 | 0.2 | 8   | 0.8 | 28   | 0.250 |
| Hungary                  | 1.5 | 118  | 6.6 | 510  | 0.232 | 0.2 | 31  | 0.9 | 87   | 0.286 |

|                           |     |      |      |       |       |     |     |      |       |       |
|---------------------------|-----|------|------|-------|-------|-----|-----|------|-------|-------|
| Iceland                   | 4.1 | 12   | 2.8  | 9     | 1.444 | 0.5 | 2   | 0.6  | 3     | 0.750 |
| India                     | 0.4 | 2726 | 5.1  | 31164 | 0.082 | 0.1 | 864 | 2.8  | 17642 | 0.038 |
| Indonesia                 | 0.1 | 39   | 0.7  | 836   | 0.071 | 0.0 | 14  | 0.2  | 265   | 0.052 |
| Iran, Islamic Republic of | 0.7 | 233  | 5.9  | 2249  | 0.110 | 0.6 | 196 | 4.6  | 1694  | 0.125 |
| Iraq                      | 0.5 | 50   | 0.4  | 39    | 1.286 | 0.2 | 22  | 0.6  | 61    | 0.333 |
| Ireland                   | 4.9 | 197  | 2.6  | 103   | 1.862 | 1.0 | 50  | 2.1  | 107   | 0.455 |
| Israel                    | 0.5 | 28   | 1.0  | 61    | 0.500 | 0.1 | 10  | 0.6  | 45    | 0.200 |
| Italy                     | 0.7 | 476  | 1.6  | 1082  | 0.400 | 0.1 | 114 | 0.5  | 455   | 0.250 |
| Jamaica                   | 0.8 | 15   | 2.5  | 46    | 0.310 | 0.3 | 5   | 0.8  | 17    | 0.333 |
| Japan                     | 0.3 | 632  | 9.0  | 15609 | 0.038 | 0.1 | 202 | 1.8  | 3576  | 0.063 |
| Jordan                    | 0.4 | 11   | 0.9  | 27    | 0.400 | 0.1 | 6   | 0.6  | 17    | 0.125 |
| Kazakhstan                | 1.2 | 96   | 10.2 | 799   | 0.121 | 0.4 | 51  | 5.5  | 669   | 0.081 |
| Kenya                     | 1.2 | 118  | 20.3 | 2266  | 0.057 | 0.7 | 86  | 15.1 | 1910  | 0.049 |
| Korea, South              | 0.3 | 53   | 7.7  | 1128  | 0.044 | 0.1 | 14  | 1.0  | 245   | 0.056 |
| Korea, Republic of        | 0.2 | 92   | 5.0  | 2260  | 0.035 | 0.0 | 27  | 0.4  | 214   | 0.127 |
| Kuwait                    | 0.6 | 7    | 1.2  | 15    | 0.500 | 0.2 | 1   | 1.1  | 10    | 0.200 |
| Kyrgyzstan                | 0.5 | 10   | 4.6  | 84    | 0.115 | 0.2 | 5   | 2.6  | 72    | 0.063 |
| Lao PDR                   | 0.5 | 11   | 7.7  | 179   | 0.063 | 0.0 | 0   | 0.7  | 17    | 0.000 |
| Latvia                    | 1.0 | 17   | 7.2  | 108   | 0.145 | 0.1 | 3   | 0.5  | 14    | 0.222 |
| Lebanon                   | 0.3 | 10   | 0.6  | 22    | 0.455 | 0.1 | 3   | 0.5  | 18    | 0.143 |
| Lesotho                   | 0.5 | 3    | 8.6  | 47    | 0.056 | 0.1 | 1   | 2.1  | 18    | 0.047 |
| Liberia                   | 0.0 | 1    | 0.5  | 5     | 0.091 | 0.0 | 0   | 0.5  | 7     | 0.000 |
| Libya                     | 0.5 | 10   | 1.0  | 21    | 0.455 | 0.0 | 1   | 0.2  | 5     | 0.143 |
| Lithuania                 | 1.2 | 28   | 7.1  | 154   | 0.175 | 0.2 | 6   | 0.5  | 21    | 0.333 |
| Luxembourg                | 3.2 | 17   | 2.7  | 14    | 1.172 | 0.5 | 3   | 0.9  | 5     | 0.545 |
| Macedonia                 | 0.6 | 8    | 1.7  | 28    | 0.333 | 0.1 | 2   | 0.2  | 5     | 0.500 |
| Madagascar                | 0.5 | 29   | 8.6  | 564   | 0.057 | 0.3 | 21  | 6.4  | 471   | 0.047 |

|                  |     |     |      |      |       |     |     |      |      |       |
|------------------|-----|-----|------|------|-------|-----|-----|------|------|-------|
| Malawi           | 1.1 | 46  | 21.0 | 915  | 0.053 | 0.7 | 38  | 15.5 | 845  | 0.045 |
| Malaysia         | 0.8 | 121 | 1.1  | 177  | 0.667 | 0.3 | 42  | 0.5  | 82   | 0.500 |
| Mali             | 0.1 | 4   | 1.9  | 90   | 0.071 | 0.1 | 5   | 1.7  | 91   | 0.050 |
| Malta            | 2.2 | 11  | 1.2  | 6    | 1.769 | 0.1 | 1   | 0.5  | 4    | 0.167 |
| Mauritania       | 0.1 | 1   | 1.1  | 14   | 0.091 | 0.0 | 0   | 1.1  | 16   | 0.000 |
| Mauritius        | 0.3 | 3   | 4.4  | 39   | 0.071 | 0.1 | 1   | 1.4  | 17   | 0.048 |
| Mexico           | 0.4 | 219 | 1.1  | 719  | 0.333 | 0.1 | 66  | 0.3  | 221  | 0.250 |
| Mongolia         | 1.1 | 10  | 20.9 | 193  | 0.050 | 0.9 | 10  | 15.1 | 184  | 0.058 |
| Montenegro       | 0.6 | 4   | 2.4  | 12   | 0.273 | 0.1 | 1   | 0.3  | 2    | 0.286 |
| Morocco          | 0.5 | 79  | 0.9  | 179  | 0.500 | 0.2 | 28  | 0.8  | 170  | 0.200 |
| Mozambique       | 0.3 | 22  | 6.5  | 437  | 0.051 | 0.3 | 27  | 6.5  | 570  | 0.045 |
| Myanmar          | 0.5 | 111 | 10.3 | 2592 | 0.046 | 0.1 | 33  | 2.7  | 747  | 0.051 |
| Namibia          | 0.1 | 1   | 2.4  | 14   | 0.045 | 0.0 | 0   | 0.9  | 7    | 0.000 |
| Nepal            | 0.2 | 25  | 1.8  | 206  | 0.125 | 0.2 | 23  | 2.3  | 311  | 0.067 |
| New Zealand      | 4.2 | 191 | 1.6  | 72   | 2.667 | 0.6 | 34  | 1.3  | 74   | 0.500 |
| Nicaragua        | 0.2 | 6   | 0.8  | 19   | 0.286 | 0.0 | 0   | 0.2  | 8    | 0.000 |
| Niger            | 0.3 | 5   | 2.8  | 123  | 0.091 | 0.0 | 0   | 0.2  | 9    | 0.000 |
| Nigeria          | 0.0 | 19  | 0.9  | 370  | 0.051 | 0.0 | 9   | 0.4  | 171  | 0.053 |
| Norway           | 3.3 | 169 | 2.1  | 108  | 1.533 | 0.4 | 30  | 0.8  | 43   | 0.571 |
| Oman             | 0.3 | 6   | 0.7  | 11   | 0.500 | 0.2 | 4   | 1.4  | 11   | 0.160 |
| Pakistan         | 0.7 | 497 | 5.8  | 4216 | 0.114 | 0.3 | 202 | 4.1  | 3038 | 0.073 |
| Panama           | 0.6 | 13  | 1.7  | 39   | 0.333 | 0.1 | 3   | 0.4  | 12   | 0.400 |
| Papua New Guinea | 0.7 | 16  | 5.1  | 114  | 0.143 | 0.4 | 12  | 2.3  | 64   | 0.188 |
| Paraguay         | 1.5 | 48  | 5.4  | 163  | 0.286 | 0.3 | 10  | 0.9  | 33   | 0.300 |
| Peru             | 0.5 | 73  | 1.3  | 229  | 0.357 | 0.1 | 33  | 0.7  | 110  | 0.200 |
| Philippines      | 0.7 | 253 | 1.5  | 566  | 0.500 | 0.1 | 62  | 0.4  | 178  | 0.250 |
| Poland           | 0.6 | 182 | 3.8  | 1215 | 0.147 | 0.1 | 49  | 0.8  | 357  | 0.143 |

|                        |     |     |      |      |       |     |     |     |      |       |
|------------------------|-----|-----|------|------|-------|-----|-----|-----|------|-------|
| Portugal               | 1.5 | 147 | 5.4  | 491  | 0.277 | 0.1 | 16  | 0.3 | 52   | 0.250 |
| Puerto Rico            | 1.1 | 31  | 2.8  | 81   | 0.375 | 0.3 | 11  | 0.5 | 24   | 0.600 |
| Qatar                  | 0.4 | 3   | 0.9  | 5    | 0.400 | 0.3 | 0   | 2.2 | 4    | 0.154 |
| Republic of Moldova    | 0.8 | 21  | 3.3  | 87   | 0.259 | 0.2 | 7   | 0.2 | 13   | 1.000 |
| Romania                | 0.7 | 112 | 3.1  | 487  | 0.229 | 0.1 | 37  | 0.5 | 96   | 0.250 |
| Russian Federation     | 0.8 | 777 | 5.5  | 5508 | 0.143 | 0.1 | 261 | 0.8 | 1424 | 0.143 |
| Rwanda                 | 0.2 | 6   | 3.3  | 120  | 0.057 | 0.1 | 4   | 2.6 | 88   | 0.048 |
| Saudi Arabia           | 0.4 | 52  | 0.9  | 112  | 0.438 | 0.1 | 12  | 1.0 | 86   | 0.143 |
| Senegal                | 0.1 | 4   | 1.6  | 56   | 0.091 | 0.0 | 0   | 1.0 | 48   | 0.000 |
| Serbia                 | 0.7 | 49  | 4.0  | 278  | 0.176 | 0.1 | 12  | 0.8 | 65   | 0.143 |
| Sierra Leone           | 0.1 | 2   | 0.8  | 18   | 0.083 | 0.0 | 0   | 0.9 | 18   | 0.000 |
| Singapore              | 0.4 | 24  | 3.6  | 183  | 0.120 | 0.1 | 6   | 0.7 | 55   | 0.200 |
| Slovakia               | 1.0 | 39  | 6.7  | 284  | 0.143 | 0.2 | 7   | 0.5 | 32   | 0.286 |
| Slovenia               | 0.9 | 17  | 3.7  | 77   | 0.233 | 0.1 | 4   | 0.7 | 19   | 0.200 |
| Solomon Islands        | 0.0 | 0   | 0.7  | 1    | 0.000 | NA  | NA  | NA  | NA   | NA    |
| Somalia                | 0.4 | 13  | 7.4  | 256  | 0.057 | 0.3 | 10  | 7.0 | 245  | 0.043 |
| South African Republic | 0.8 | 155 | 10.6 | 2023 | 0.078 | 0.5 | 155 | 4.9 | 1364 | 0.113 |
| South Sudan            | 0.5 | 16  | 8.9  | 292  | 0.055 | 0.3 | 10  | 5.8 | 205  | 0.043 |
| Spain                  | 1.2 | 580 | 3.0  | 1329 | 0.419 | 0.2 | 114 | 0.5 | 288  | 0.400 |
| Sri Lanka              | 0.6 | 83  | 5.4  | 688  | 0.120 | 0.3 | 45  | 4.0 | 625  | 0.078 |
| Sudan                  | 1.4 | 162 | 3.1  | 359  | 0.450 | 0.6 | 81  | 4.4 | 530  | 0.146 |
| Suriname               | 0.3 | 1   | 0.8  | 2    | 0.333 | NA  | NA  | NA  | NA   | 0.200 |
| Sweden                 | 2.3 | 249 | 1.6  | 177  | 1.400 | 0.4 | 45  | 0.6 | 81   | 0.571 |
| Switzerland            | 2.5 | 222 | 3.2  | 267  | 0.788 | 0.4 | 49  | 1.2 | 117  | 0.357 |
| Syrian Arab Republic   | 0.3 | 18  | 0.7  | 41   | 0.444 | 0.1 | 6   | 0.6 | 39   | 0.143 |
| Tajikistan             | 1.4 | 37  | 11.8 | 309  | 0.120 | 0.6 | 18  | 8.6 | 255  | 0.070 |
| Tanzania               | 0.6 | 76  | 10.8 | 1396 | 0.057 | 0.3 | 47  | 6.4 | 997  | 0.052 |

|                          |     |       |      |      |       |     |      |      |      |       |
|--------------------------|-----|-------|------|------|-------|-----|------|------|------|-------|
| Thailand                 | 0.4 | 185   | 5.5  | 2836 | 0.073 | 0.1 | 49   | 0.8  | 493  | 0.125 |
| The Gambia               | 0.1 | 0     | 0.5  | 4    | 0.100 | NA  | NA   | NA   | NA   | NA    |
| The Netherlands          | 7.7 | 1373  | 3.0  | 540  | 2.536 | 1.2 | 251  | 1.4  | 292  | 0.800 |
| Timor-Leste              | 0.0 | 0     | 0.9  | 3    | 0.042 | 0.0 | 0    | 0.3  | 1    | 0.125 |
| Togo                     | 0.2 | 4     | 3.1  | 60   | 0.053 | 0.1 | 2    | 1.5  | 37   | 0.053 |
| Trinidad and Tobago      | 0.5 | 4     | 1.7  | 16   | 0.294 | NA  | NA   | NA   | NA   | NA    |
| Tunisia                  | 0.3 | 20    | 0.6  | 43   | 0.500 | 0.1 | 7    | 0.5  | 41   | 0.250 |
| Turkey                   | 0.5 | 201   | 1.4  | 583  | 0.355 | 0.1 | 49   | 1.2  | 637  | 0.071 |
| Turkmenistan             | 1.2 | 22    | 10.0 | 191  | 0.122 | 0.5 | 13   | 7.2  | 182  | 0.072 |
| Uganda                   | 0.9 | 63    | 17.0 | 1219 | 0.056 | 0.3 | 22   | 4.9  | 445  | 0.051 |
| Ukraine                  | 1.1 | 347   | 5.5  | 1716 | 0.200 | 0.2 | 90   | 0.3  | 163  | 0.667 |
| United Arab Emirates     | 0.4 | 8     | 1.1  | 19   | 0.417 | 0.2 | 1    | 1.0  | 9    | 0.182 |
| United Kingdom           | 7.5 | 5146  | 2.6  | 1786 | 2.880 | 1.4 | 1291 | 2.1  | 1865 | 0.700 |
| United States of America | 3.7 | 10722 | 1.9  | 5289 | 2.000 | 0.4 | 1561 | 0.8  | 2492 | 0.571 |
| Uruguay                  | 1.7 | 44    | 5.2  | 135  | 0.318 | 0.4 | 20   | 1.5  | 59   | 0.286 |
| Uzbekistan               | 0.5 | 54    | 4.1  | 448  | 0.125 | 0.2 | 29   | 3.0  | 408  | 0.064 |
| Venezuela                | 0.8 | 106   | 2.3  | 357  | 0.333 | 0.1 | 28   | 0.5  | 97   | 0.250 |
| Yemen                    | 1.6 | 96    | 3.4  | 208  | 0.467 | 0.9 | 64   | 5.9  | 417  | 0.158 |
| Zambia                   | 0.4 | 13    | 7.5  | 235  | 0.058 | 0.1 | 6    | 3.3  | 135  | 0.042 |
| Zimbabwe                 | 2.9 | 92    | 10.1 | 314  | 0.289 | 1.4 | 62   | 10.7 | 452  | 0.127 |

---

AC adenocarcinoma; SCC, squamous cell carcinoma; N, number of cases; NA, not applicable; ASR, age-standardised rate.

**Table S5.** The trend analysis of esophageal cancer by country**a. Incidence trend in individuals aged 0-85+ years**

| <b>Region</b>                  | <b>Male: AAPC (95% CI), p</b>                | <b>Female: AAPC (95% CI), p</b>           |
|--------------------------------|----------------------------------------------|-------------------------------------------|
| <b><i>Asia</i></b>             |                                              |                                           |
| Bahrain                        | <b>-15.52*(-26.15 to -3.36),<br/>p=0.020</b> | NA                                        |
| Mainland China                 | <b>-2.97*(-3.80 to -2.13), p&lt;0.001</b>    | <b>-6.84*(-7.79 to -5.88), p&lt;0.001</b> |
| Hong Kong, China               | <b>-4.12*(-4.98 to -3.26), p&lt;0.001</b>    | <b>-7.34*(-10.25 to -4.34), p=0.001</b>   |
| India                          | <b>-5.00*(-8.18 to -1.70), p=0.008</b>       | -2.56 (-5.15 to 0.12), p=0.058            |
| Israel                         | -2.65 (-5.39 to 0.16), p=0.061               | -0.97 (-5.63 to 3.91), p=0.652            |
| Japan                          | <b>1.17*(0.41 to 1.94), p=0.007</b>          | <b>2.18*(0.58 to 3.80), p=0.014</b>       |
| South Korea                    | <b>-1.46*(-2.64 to -0.25), p=0.018</b>       | -0.27 (-3.31 to 2.87), p=0.845            |
| Kuwait                         | 7.45 (-4.15 to 20.46), p=0.185               | -1.37 (-14.71 to 14.05), p=0.832          |
| Philippines                    | -4.35 (-8.83 to 0.36), p=0.065               | <b>-7.20*(-12.21 to -1.90), p=0.015</b>   |
| Thailand                       | <b>2.17*(0.74 to 3.62), p=0.008</b>          | 1.80 (-7.89 to 4.70), p=0.532             |
| <b><i>Oceania</i></b>          |                                              |                                           |
| Australia                      | 0.54 (-0.17 to 1.26), p=0.119                | -1.23 (-2.63 to 0.20), p=0.082            |
| New Zealand                    | -0.46 (-2.42 to 1.53), p=0.603               | -0.54 (-4.05 to 3.10), p=0.736            |
| <b><i>Northern America</i></b> |                                              |                                           |
| Canada                         | <b>1.51*(0.54 to 2.49), p=0.007</b>          | -0.21 (-1.88 to 1.49), p=0.782            |
| United States                  | <b>-0.97*(-1.60 to -0.33), p=0.008</b>       | -0.53 (-2.54 to 1.51), p=0.561            |
| <b><i>Southern America</i></b> |                                              |                                           |
| Brazil                         | <b>-5.94*(-10.44 to -1.21), p=0.021</b>      | <b>-8.78*(-14.32 to -2.89), p=0.010</b>   |
| Chile                          | -1.72 (-6.94 to 3.80), p=0.534               | -7.77 (-16.01 to 1.27), p=0.081           |
| Colombia                       | <b>-9.14*(-12.96 to -5.16), p=0.001</b>      | 1.12 (-11.23 to 15.2), p=0.848            |
| Costa Rica                     | -2.30 (-5.36 to 0.86), p=0.131               | -0.27 (-7.34 to 7.33), p=0.934            |
| Ecuador                        | -4.69 (-15.02 to 6.89), p=0.362              | 0.73 (-8.11 to 10.43), p=0.859            |

### *Northern Europe*

|                |                                     |                                 |
|----------------|-------------------------------------|---------------------------------|
| Denmark        | 1.15 (-2.19 to 4.60), p=0.506       | 1.31 (-0.90 to 3.55), p=0.210   |
| Estonia        | 2.06 (-2.01 to 6.30), p=0.281       | 4.19 (-3.11 to 12.04), p=0.229  |
| Faroe Islands  | 17.36 (-1.97 to 40.49), p=0.074     | NA                              |
| Finland        | 1.37 (-0.16 to 2.93), p=0.073       | 1.04 (-3.40 to 5.69), p=0.609   |
| Greenland      | -0.05 (-18.94 to 23.26), p=0.996    | -2.16(-15.46 to 13.23), p=0.739 |
| Iceland        | -5.07 (-10.52 to 0.73), p=0.078     | 2.16 (-11.73 to 18.23), p=0.745 |
| Ireland        | -0.85 (-2.70 to 1.04), p=0.329      | -1.23 (-2.71 to 0.28), p=0.097  |
| Lithuania      | 1.23 (-1.13 to 3.63), p=0.266       | 4.39 (-0.39 to 9.39), p=0.067   |
| Norway         | <b>3.10*(1.23 to 5.00), p=0.005</b> | 1.80 (-0.22 to 3.86), p=0.074   |
| Sweden         | 0.83 (-1.22 to 2.92), p=0.381       | -0.07 (-2.56 to 2.49), p=0.950  |
| United Kingdom | <b>0.85*(0.44 to 1.26), p=0.001</b> | -0.19 (-0.69 to 0.31), p=0.401  |

### *Western Europe*

|             |                                        |                                     |
|-------------|----------------------------------------|-------------------------------------|
| Austria     | -1.27 (-2.55 to 0.03), p=0.055         | 2.18 (-1.86 to 6.39), p=0.252       |
| Belarus     | 1.09*(0.00 to 2.20), p=0.050           | 1.27 (-4.61 to 7.51), p=0.640       |
| France      | <b>-2.57*(-3.68 to -1.44), p=0.001</b> | 0.96 (-2.19 to 4.20), p=0.508       |
| Germany     | 0.76 (-1.40 to 2.97), p=0.443          | 2.49 (-1.19 to 6.30), p=0.159       |
| Netherlands | <b>2.11*(1.25 to 2.98), p&lt;0.001</b> | <b>1.88*(0.51 to 3.27), p=0.013</b> |
| Switzerland | -2.26*(-4.03 to -0.47), p=0.020        | 2.14 (-1.61 to 6.03), p=0.228       |

### *Southern Europe*

|          |                                        |                                     |
|----------|----------------------------------------|-------------------------------------|
| Bulgaria | 2.17 (-0.24 to 4.64), p=0.072          | 1.01 (-2.79 to 4.97), p=0.562       |
| Croatia  | -2.14 (-4.32 to 0.09), p=0.057         | 1.21 (-5.81 to 8.76), p=0.709       |
| Cyprus   | 2.81 (-12.83 to 21.25), p=0.709        | NA                                  |
| Italy    | <b>-3.02*(-5.77 to -0.20), p=0.036</b> | -1.21 (-3.96 to 1.63), p=0.352      |
| Malta    | 1.96 (-7.48 to 12.36), p=0.657         | -0.54 (-23.51 to 29.32), p=0.968    |
| Slovenia | <b>-3.53*(-6.38 to -0.58), p=0.025</b> | -0.75 (-6.98 to 5.89), p=0.795      |
| Spain    | <b>-2.16*(-3.46 to -0.85), p=0.005</b> | <b>3.41*(0.90 to 5.99), p=0.014</b> |



|                       |                                |                                     |
|-----------------------|--------------------------------|-------------------------------------|
| Turkey                | -3.96 (-7.83 to 0.08), p=0.054 | -1.54 (-4.88 to 1.91), p=0.329      |
| <i>Eastern Europe</i> |                                |                                     |
| Czech Republic        | 1.27 (-0.25 to 2.81), p=0.091  | <b>4.66*(0.47 to 9.03), p=0.033</b> |
| Poland                | 0.33 (-4.01 to 4.87), p=0.868  | 2.40 (-12.89 to 20.37), p=0.744     |
| Slovakia              | -0.55 (-2.43 to 1.36), p=0.568 | -0.48 (-5.41 to 4.70), p=0.831      |
| <i>Africa</i>         |                                |                                     |
| Uganda                | 4.36 (-0.27 to 9.20), p=0.062  | 0.02 (-7.28 to 7.90), p=0.995       |

AAPC, annual percentage change; CI, confidence interval; NA, not applicable; \* p values less than 0.05.

**b. Mortality trend in individuals aged 0-85+ years**

| Region           | Male: AAPC (95% CI), p                    | Female: AAPC (95% CI), p         |
|------------------|-------------------------------------------|----------------------------------|
| <i>Asia</i>      |                                           |                                  |
| Bahrain          | -13.68(-26.96 to 2.02), p=0.077           | -6.13(-16.32 to 5.31), p=0.240   |
| Hong Kong, China | <b>-4.91*(-5.73 to -4.08), p&lt;0.001</b> | -5.86*(-8.79 to -2.84), p=0.002  |
| Israel           | -2.02 (-4.53 to 0.55), p=0.107            | -0.94 (-4.08 to 2.30), p=0.517   |
| Japan            | <b>-2.60*(-2.98 to -2.21), p&lt;0.001</b> | NA                               |
| South Korea      | -4.21*(-5.19 to -3.22), p<0.001           | -3.36 (-7.96 to 1.47), p=0.145   |
| Kuwait           | -3.98 (-15.43 to 9.02), p=0.482           | -7.88 (-23.12 to 10.38), p=0.326 |
| Philippines      | 1.96 (-0.54 to 4.51), p=0.109             | -2.20 (-6.20 to 1.98), p=0.256   |
| Singapore        | -2.66 (-6.52 to 1.36), p=0.163            | -0.86 (-4.21 to 2.60), p=0.576   |
| Thailand         | <b>5.24*(4.76 to 5.72), p&lt;0.001</b>    | NA                               |
| <i>Oceania</i>   |                                           |                                  |

|                         |                                           |                                           |
|-------------------------|-------------------------------------------|-------------------------------------------|
| Australia               | -1.49*(-2.25 to -0.72), p=0.002           | -2.00 (-3.99 to 0.03), p=0.053            |
| New Zealand             | -0.41 (-2.57 to 1.79), p=0.674            | -1.01 (-3.43 to 1.46), p=0.370            |
| <i>Northern America</i> |                                           |                                           |
| Canada                  | -0.40 (-1.29 to 0.50), p=0.335            | -0.07 (-1.55 to 1.44), p=0.917            |
| United States           | <b>-1.14*(-1.45 to -0.83), p&lt;0.001</b> | -1.21*(-2.36 to -0.04), p=0.044           |
| <i>Southern America</i> |                                           |                                           |
| Brazil                  | <b>-1.41*(-1.75 to -1.06), p&lt;0.001</b> | <b>-2.14*(-2.58 to -1.70), p&lt;0.001</b> |
| Chile                   | <b>-5.05*(-5.89 to -4.21), p&lt;0.001</b> | -2.84*(-4.35 to -1.30), p=0.003           |
| Colombia                | <b>-3.88*(-5.67 to -2.06), p&lt;0.001</b> | -4.87*(-7.12 to -2.57), p=0.001           |
| Costa Rica              | -3.34 (-7.27 to 0.76), p=0.096            | -0.79 (-6.87 to 5.68), p=0.780            |
| Ecuador                 | -0.87 (-5.47 to 3.96), p=0.684            | -2.75 (-6.51 to 1.17), p=0.142            |
| <i>Northern Europe</i>  |                                           |                                           |
| Denmark                 | -0.14 (-2.33 to 2.09), p=0.885            | -0.50 (-4.30 to 3.44), p=0.772            |
| Estonia                 | 0.91 (-3.72 to 5.77), p=0.668             | 8.59 (-1.01 to 19.11), p=0.074            |
| Faroe Islands           | 3.84 (-9.88 to 19.64), p=0.557            | NA                                        |
| Finland                 | 0.80 (-1.87 to 3.55), p=0.513             | -1.25 (-4.63 to 2.25), p=0.429            |
| Greenland               | -4.15(-13.40 to 6.09), p=0.364            | -1.46(-13.72 to 12.55), p=0.805           |
| Iceland                 | -2.50 (-8.69 to 4.11), p=0.399            | 2.58 (-8.74 to 15.30), p=0.629            |
| Ireland                 | -0.06 (-1.94 to 1.86), p=0.947            | -1.85 (-3.80 to 0.14), p=0.064            |
| Latvia                  | 2.33*(0.45 to 4.25), p=0.021              | 0.42 (-3.85 to 4.88), p=0.830             |
| Lithuania               | 0.01 (-1.79 to 1.84), p=0.995             | 0.67 (-4.52 to 6.14), p=0.778             |
| Norway                  | 0.33 (-1.63 to 2.33), p=0.712             | 4.47 (-3.85 to 13.51), p=0.302            |
| Sweden                  | 0.79 (-0.45 to 2.04), p=0.18              | -0.51 (-3.46 to 2.54), p=0.708            |
| United Kingdom          | <b>-0.99*(-1.38 to -0.60), p&lt;0.001</b> | <b>-1.73*(-2.24 to -1.23), p&lt;0.001</b> |
| <i>Western Europe</i>   |                                           |                                           |
| Austria                 | -1.60*(-2.73 to -0.47), p=0.012           | 3.67*(0.76 to 6.67), p=0.019              |
| Belgium                 | 0.01 (-1.07 to 1.10), p=0.983             | 0.63 (-0.79 to 2.07), p=0.340             |

|                               |                                           |                                  |
|-------------------------------|-------------------------------------------|----------------------------------|
| France                        | <b>-3.32*(-3.71 to -2.93), p&lt;0.001</b> | 0.07 (-1.72 to 1.89), p=0.928    |
| Germany                       | 0.25 (-0.43 to 0.94), p=0.425             | 0.00 (-0.98 to 0.99), p=1.000    |
| Netherlands                   | -0.14 (-0.64 to 0.37), p=0.542            | -0.26 (-0.83 to 0.31), p=0.316   |
| Switzerland                   | -1.05*(-1.79 to -0.31), p=0.011           | -1.37 (-3.52 to 0.82), p=0.185   |
| <b><i>Southern Europe</i></b> |                                           |                                  |
| Bulgaria                      | -0.97*(-1.85 to -0.08), p=0.037           | 0.25 (-4.32 to 5.04), p=0.904    |
| Croatia                       | -2.78*(-5.01 to -0.50), p=0.023           | -3.32 (-8.83 to 2.52), p=0.221   |
| Cyprus                        | -4.17 (-13.84 to 6.59), p=0.383           | NA                               |
| Italy                         | -1.84*(-2.63 to -1.05), p=0.001           | -0.33 (-3.88 to 3.36), p=0.860   |
| Malta                         | 6.71 (-9.80 to 26.23), p=0.399            | -1.63 (-12.58 to 10.69), p=0.756 |
| Portugal                      | 1.12*(0.24 to 2.01), p=0.018              | -2.89 (-6.24 to 0.57), p=0.089   |
| Slovenia                      | -2.50 (-5.66 to 0.75), p=0.113            | -1.37 (-5.78 to 3.24), p=0.506   |
| Spain                         | -1.93*(-2.74 to -1.10), p=0.001           | -0.19 (-3.74 to 3.50), p=0.909   |
| <b><i>Eastern Europe</i></b>  |                                           |                                  |
| Slovakia                      | -2.09*(-3.75 to -0.40), p=0.022           | -2.83 (-8.56 to 3.26), p=0.307   |
| Czech Republic                | 0.18 (-1.71 to 2.11), p=0.851             | 2.04 (-1.39 to 5.59), p=0.210    |
| Poland                        | -2.17*(-3.23 to -1.11), p=0.002           | -0.08 (-1.96 to 1.83), p=0.924   |
| Russian Federation            | -0.97*(-1.45 to -0.48), p=0.002           | -1.14*(-2.25 to -0.02), p=0.046  |
| Belarus                       | -0.28(-1.66 to 1.13), p=0.661             | -2.42(-7.59 to 3.03), p=0.329    |

---

AAPC, annual percentage change; CI, confidence interval; NA, not applicable; \* p values less than 0.05.

**c. Incidence trend in individuals aged  $\geq 50$  years**

| <b>Region</b>                  | <b>Male: AAPC (95% CI), p</b>             | <b>Female: AAPC (95% CI), p</b>            |
|--------------------------------|-------------------------------------------|--------------------------------------------|
| <b><i>Asia</i></b>             |                                           |                                            |
| Bahrain                        | -1.60 (-19.77 to 20.69), p=0.877          | NA                                         |
| Mainland China                 | <b>-2.92*(-3.80 to -2.02), p&lt;0.001</b> | <b>-6.87*(-7.97 to -5.76), p&lt;0.001</b>  |
| Hong Kong, China               | <b>-4.12*(-5.22 to -3.00), p&lt;0.001</b> | <b>-7.84*(-10.67 to -4.92), p&lt;0.001</b> |
| India                          | -4.51*(-7.31 to -1.63), p=0.007           | -1.87 (-4.17 to 0.49), p=0.105             |
| Israel                         | -2.76 (-5.49 to 0.04), p=0.053            | -1.07 (-4.08 to 2.02), p=0.443             |
| Japan                          | 1.35*(0.55 to 2.16), p=0.005              | 2.47*(1.02 to 3.93), p=0.004               |
| South Korea                    | -1.56*(-2.47 to -0.63), p=0.001           | 0.05 (-3.29 to 3.49), p=0.976              |
| Kuwait                         | 6.90 (-8.66 to 25.11), p=0.357            | -1.69 (-14.64 to 13.22), p=0.788           |
| Philippines                    | -3.30 (-7.35 to 0.92), p=0.108            | -9.25*(-14.33 to -3.87), p=0.005           |
| Thailand                       | 0.98 (-0.75 to 2.74), p=0.228             | -2.27 (-7.40 to 3.15), p=0.356             |
| <b><i>Oceania</i></b>          |                                           |                                            |
| Australia                      | 0.53(-0.02 to 1.10), p=0.058              | -1.16 (-2.41 to 0.11), p=0.069             |
| New Zealand                    | -0.39 (-2.19 to 1.44), p=0.633            | -1.43 (-5.23 to 2.53), p=0.425             |
| <b><i>Northern America</i></b> |                                           |                                            |
| Canada                         | 1.57*(0.54 to 2.60), p=0.008              | 0.19 (-1.39 to 1.81), p=0.786              |
| United States                  | -0.86*(-1.66 to -0.06), p=0.039           | -0.42 (-2.25 to 1.44), p=0.613             |
| <b><i>Southern America</i></b> |                                           |                                            |
| Brazil                         | -6.05*(-10.66 to -1.20), p=0.021          | -6.78 (-16.06 to 3.52), p=0.189            |
| Chile                          | -3.40 (-10.62 to 4.40), p=0.382           | -7.44 (-15.90 to 1.86), p=0.100            |
| Colombia                       | -8.69*(-12.23 to -5.01), p=0.001          | -0.92 (-13.95 to 14.09), p=0.884           |
| Costa Rica                     | -1.78 (-5.22 to 1.78), p=0.278            | -0.89 (-7.99 to 6.75), p=0.787             |
| Ecuador                        | 0.34 (-19.61 to 25.23), p=0.976           | -2.69 (-12.36 to 8.05), p=0.565            |
| <b><i>Northern Europe</i></b>  |                                           |                                            |
| Denmark                        | 1.84 (-1.86 to 5.68), p=0.334             | 1.78 (-0.39 to 4.01), p=0.096              |

|                |                                        |                                 |
|----------------|----------------------------------------|---------------------------------|
| Estonia        | 2.28 (-1.49 to 6.19), p=0.204          | 4.92 (-4.61 to 15.40), p=0.278  |
| Faroe Islands  | 19.22*(1.17 to 40.49), p=0.039         | NA                              |
| Finland        | 1.28 (-0.04 to 2.61), p=0.055          | 0.54 (-4.06 to 5.37), p=0.797   |
| Greenland      | -0.16 (-19.03 to 23.1), p=0.986        | -2.26(-15.26 to 12.73), p=0.722 |
| Iceland        | -4.75 (-10.71 to 1.61), p=0.120        | 3.56 (-9.21 to 18.12), p=0.557  |
| Ireland        | -0.91 (-2.42 to 0.62), p=0.206         | -1.03 (-2.98 to 0.96), p=0.265  |
| Lithuania      | 1.22 (-1.23 to 3.72), p=0.287          | 1.70 (-3.22 to 6.87), p=0.456   |
| Norway         | <b>2.77*(0.86 to 4.73), p=0.010</b>    | 1.80 (-0.18 to 3.82), p=0.070   |
| Sweden         | 0.85 (-1.59 to 3.35), p=0.449          | 0.64 (-2.12 to 3.48), p=0.610   |
| United Kingdom | <b>0.96*(0.60 to 1.33), p&lt;0.001</b> | -0.11 (-0.62 to 0.40), p=0.634  |

### *Western Europe*

|             |                                 |                               |
|-------------|---------------------------------|-------------------------------|
| Austria     | -0.97 (-2.66 to 0.74), p=0.225  | 1.48 (-1.54 to 4.58), p=0.295 |
| Belarus     | 1.06 (-0.12 to 2.25), p=0.071   | 0.46 (-5.44 to 6.74), p=0.865 |
| France      | -2.12*(-3.50 to -0.72), p=0.008 | 1.48 (-1.26 to 4.29), p=0.250 |
| Germany     | 0.94 (-1.21 to 3.13), p=0.347   | 2.40 (-0.58 to 5.46), p=0.101 |
| Netherlands | 2.29*(1.30 to 3.30), p=0.001    | 2.22*(0.94 to 3.51), p=0.004  |
| Switzerland | -2.13 (-4.42 to 0.21), p=0.069  | 2.28 (-1.65 to 6.35), p=0.221 |

### *Southern Europe*

|          |                                 |                                |
|----------|---------------------------------|--------------------------------|
| Bulgaria | 2.26 (-0.22 to 4.81), p=0.069   | 1.50 (-2.80 to 5.99), p=0.451  |
| Croatia  | -2.09*(-4.06 to -0.08), p=0.044 | 6.25 (-8.34 to 23.15), p=0.421 |
| Cyprus   | 2.39 (-14.97 to 23.29), p=0.777 | NA                             |
| Italy    | -3.33*(-4.90 to -1.74), p=0.001 | -1.01 (-3.86 to 1.93), p=0.447 |
| Malta    | 1.93 (-8.23 to 13.21), p=0.686  | NA                             |
| Slovenia | -3.25*(-6.28 to -0.12), p=0.044 | -0.28 (-5.33 to 5.05), p=0.905 |
| Spain    | -1.70*(-2.70 to -0.69), p=0.005 | 4.14*(0.47 to 7.93), p=0.031   |
| Turkey   | -2.78*(-5.13 to -0.38), p=0.029 | -0.75 (-4.80 to 3.47), p=0.688 |

### *Eastern Europe*

|                |                                     |                                |
|----------------|-------------------------------------|--------------------------------|
| Czech Republic | 1.80*(0.37 to 3.24), p=0.020        | 4.90*(2.44 to 7.42), p=0.002   |
| Poland         | 1.32 (-3.74 to 6.65), p=0.571       | 0.96 (-12.81 to 16.9), p=0.885 |
| Slovakia       | 0.36 (-1.19 to 1.93), p=0.652       | 0.47 (-4.39 to 5.58), p=0.831  |
| <i>Africa</i>  |                                     |                                |
| Uganda         | <b>4.57*(0.09 to 9.25), p=0.047</b> | -0.51 (-8.28 to 7.92), p=0.888 |

AAPC, annual percentage change; CI, confidence interval; NA, not applicable; \* p values less than 0.05.

#### d. Incidence trend in individuals aged < 50 years

| Region           | Male: AAPC (95% CI), p           | Female: AAPC (95% CI), p                  |
|------------------|----------------------------------|-------------------------------------------|
| <i>Asia</i>      |                                  |                                           |
| Bahrain          | NA                               | NA                                        |
| Mainland China   | -3.60*(-6.53 to -0.58), p=0.026  | -7.67*(-13.26 to -1.73), p=0.018          |
| Hong Kong, China | -3.77 (-8.60 to 1.32), p=0.124   | <b>-5.86*(-5.86 to -5.86), p&lt;0.001</b> |
| India            | -11.07 (-26.08 to 6.98), p=0.213 | -5.36 (-11.34 to 1.02), p=0.087           |
| Israel           | 0.42 (-9.67 to 11.64), p=0.929   | NA                                        |
| Japan            | -2.66 (-7.64 to 2.60), p=0.271   | 4.27 (-2.92 to 11.98), p=0.214            |
| South Korea      | 2.24 (-2.71 to 7.43), p=0.334    | NA                                        |
| Kuwait           | NA                               | NA                                        |
| Philippines      | -12.28 (-27.23 to 5.74), p=0.145 | NA                                        |
| Thailand         | 12.01*(5.57 to 18.84), p=0.002   | NA                                        |
| <i>Oceania</i>   |                                  |                                           |

|                         |                                  |                                 |
|-------------------------|----------------------------------|---------------------------------|
| Australia               | -0.10 (-3.71 to 3.65), p=0.953   | 0.42 (-5.33 to 6.52), p=0.873   |
| New Zealand             | -0.28 (-11.79 to 12.73), p=0.959 | 8.40 (-2.85 to 20.95), p=0.128  |
| <i>Northern America</i> |                                  |                                 |
| Canada                  | 2.26 (-0.92 to 5.55), p=0.142    | 0.00 (0.00 to 0.00), p=0.235    |
| United States           | -0.41 (-3.24 to 2.51), p=0.754   | 0.00 (0.00 to 0.00), p=0.235    |
| <i>Southern America</i> |                                  |                                 |
| Brazil                  | -5.91 (-13.44 to 2.29), p=0.131  | NA                              |
| Chile                   | NA                               | NA                              |
| Colombia                | -12.29 (-23.97 to 1.19), p=0.067 | NA                              |
| Costa Rica              | -0.34 (-13.70 to 15.08), p=0.958 | NA                              |
| Ecuador                 | NA                               | NA                              |
| <i>Northern Europe</i>  |                                  |                                 |
| Denmark                 | -9.79 (-19.09 to 0.58), p=0.061  | -3.85 (-13.80 to 7.26), p=0.432 |
| Estonia                 | -3.05 (-12.83 to 7.83), p=0.521  | NA                              |
| Faroe Islands           | NA                               | NA                              |
| Finland                 | -2.07 (-10.55 to 7.22), p=0.609  | -0.84 (-8.31 to 7.25), p=0.811  |
| Greenland               | NA                               | NA                              |
| Iceland                 | NA                               | NA                              |
| Ireland                 | 1.47 (-6.59 to 10.23), p=0.695   | -3.79 (-15.56 to 9.63), p=0.514 |
| Lithuania               | 0.96 (-1.81 to 3.81), p=0.451    | NA                              |
| Norway                  | 6.79*(0.10 to 13.93), p=0.047    | NA                              |
| Sweden                  | -3.84 (-12.95 to 6.22), p=0.391  | 2.12 (-3.49 to 8.06), p=0.416   |
| United Kingdom          | -0.57 (-2.82 to 1.75), p=0.585   | -5.50*(-8.70 to -2.18), p=0.005 |
| <i>Western Europe</i>   |                                  |                                 |
| Austria                 | -2.57 (-11.36 to 7.09), p=0.543  | NA                              |
| Belarus                 | 0.62 (-2.39 to 3.72), p=0.650    | NA                              |
| France                  | -6.40*(-9.15 to -3.56), p=0.001  | -7.00 (-16.07 to 3.06), p=0.142 |

|                               |                                  |                                 |
|-------------------------------|----------------------------------|---------------------------------|
| Germany                       | -1.54 (-8.48 to 5.94), p=0.639   | 1.59 (-10.95 to 15.89), p=0.789 |
| Netherlands                   | 0.22 (-3.16 to 3.71), p=0.888    | -2.26 (-10.25 to 6.45), p=0.554 |
| Switzerland                   | -5.78 (-15.52 to 5.09), p=0.244  | NA                              |
| <b><i>Southern Europe</i></b> |                                  |                                 |
| Bulgaria                      | 2.88 (-2.66 to 8.74), p=0.270    | NA                              |
| Croatia                       | -0.22 (-4.53 to 4.29), p=0.911   | NA                              |
| Cyprus                        | NA                               | NA                              |
| Italy                         | -5.29 (-12.49 to 2.50), p=0.152  | -2.08 (-10.37 to 6.99), p=0.599 |
| Malta                         | NA                               | NA                              |
| Slovenia                      | -3.53 (-15.77 to 10.49), p=0.558 | NA                              |
| Spain                         | -6.56*(-10.13 to -2.86), p=0.004 | -1.25 (-10.46 to 8.90), p=0.774 |
| Turkey                        | -7.21*(-13.70 to -0.24), p=0.044 | -4.68 (-12.29 to 3.59), p=0.220 |
| <b><i>Eastern Europe</i></b>  |                                  |                                 |
| Czech Republic                | -3.22 (-8.71 to 2.59), p=0.231   | NA                              |
| Poland                        | -6.66 (-22.21 to 12.02), p=0.409 | NA                              |
| Slovakia                      | -7.45*(-12.02 to -2.63), p=0.008 | 2.30 (-8.67 to 14.58), p=0.656  |
| <b><i>Africa</i></b>          |                                  |                                 |
| Uganda                        | 2.92 (-3.34 to 9.585), p=0.321   | 8.99(-0.75 to 19.68), p=0.067   |

---

AAPC, annual percentage change; CI, confidence interval; NA, not applicable; \* p values less than 0.05.



**Figure S1. The incidence and mortality trends of esophageal cancer**

Male

**Asia**

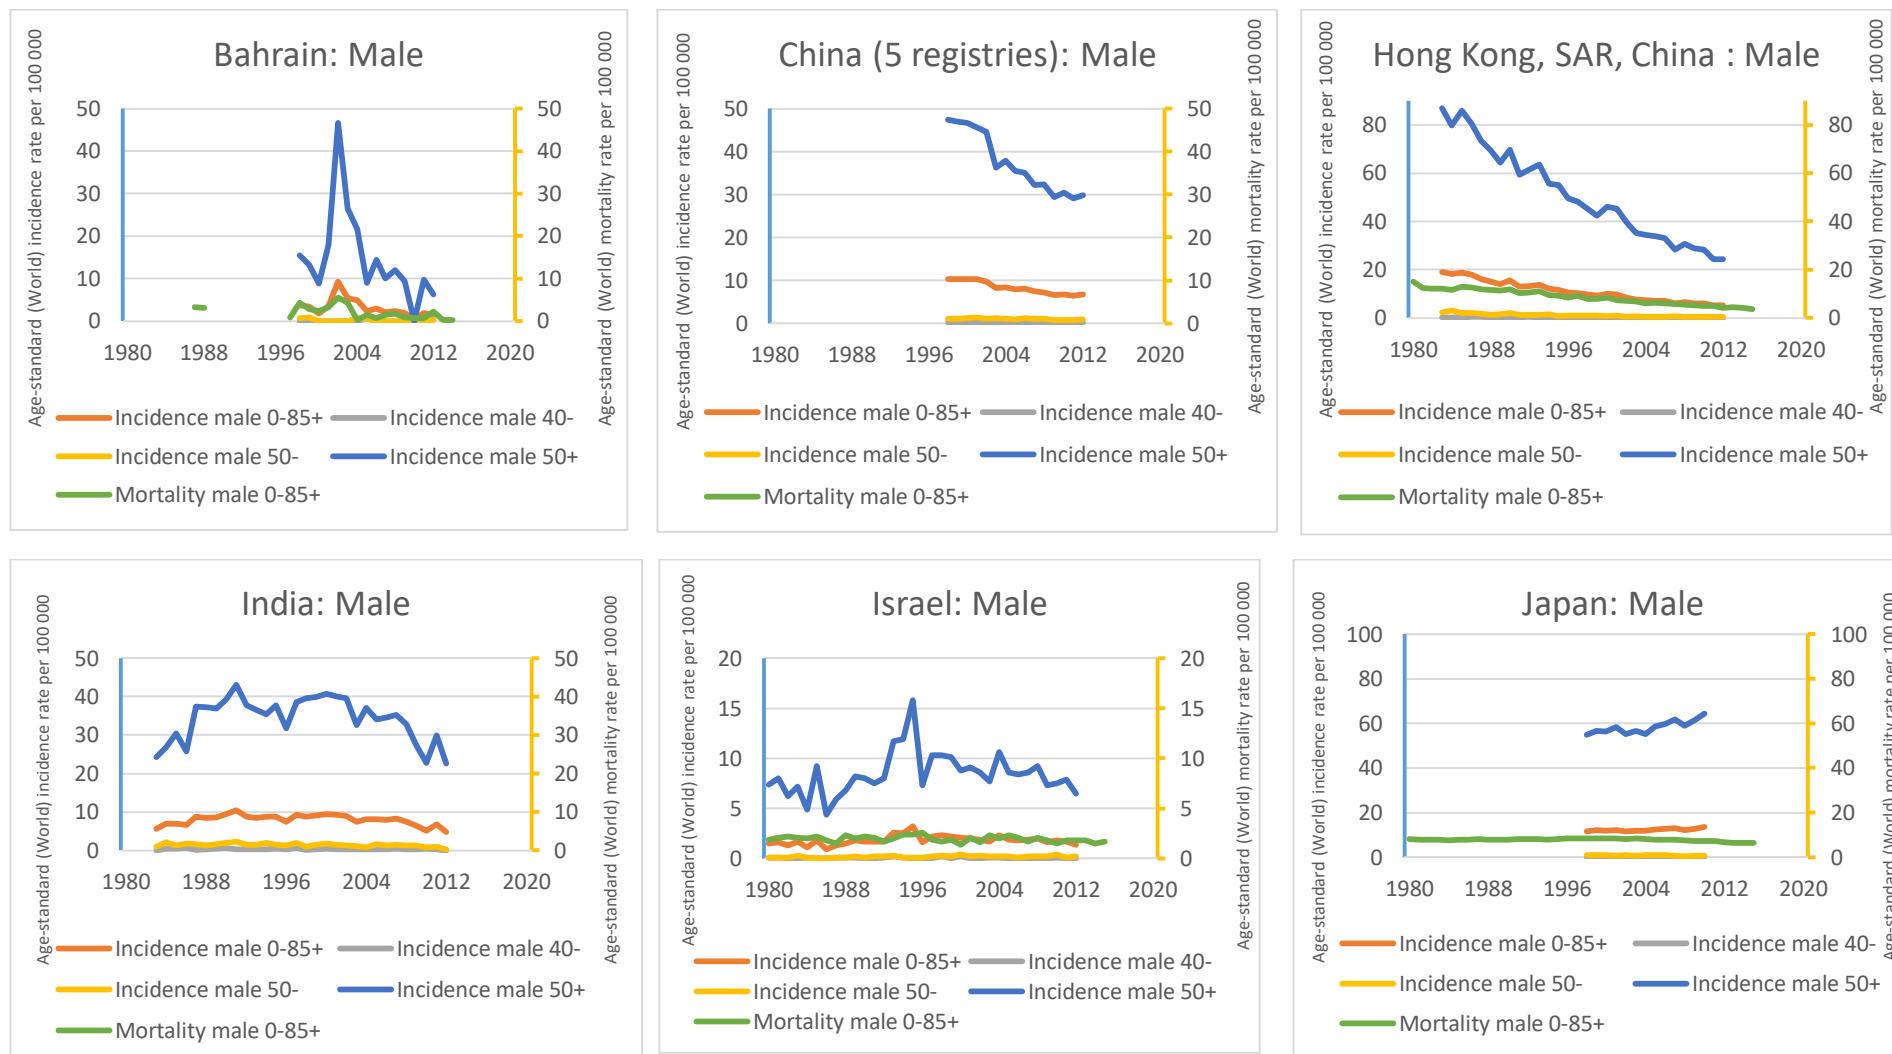

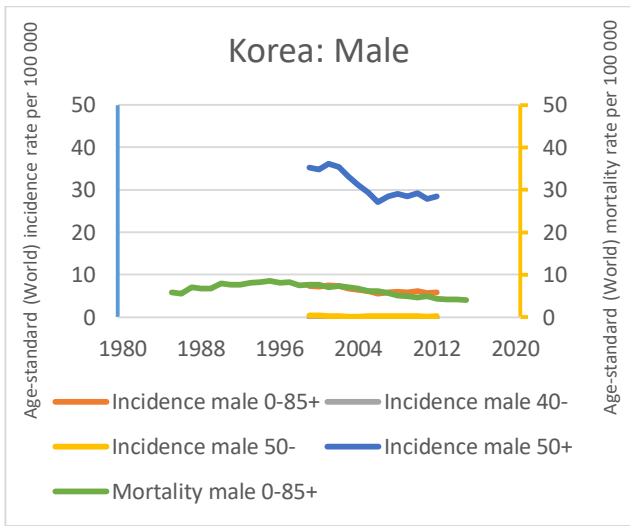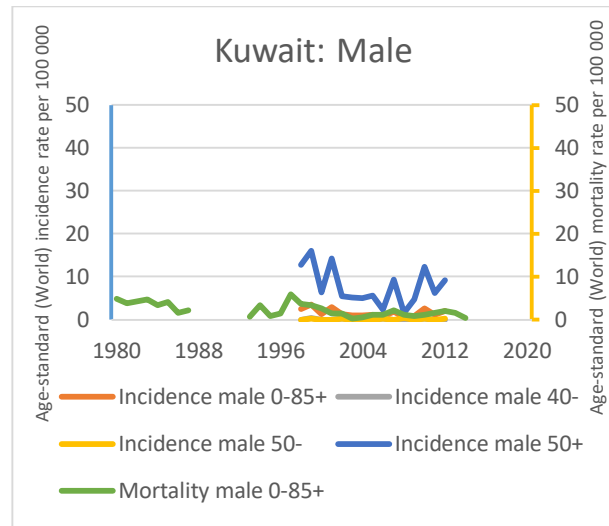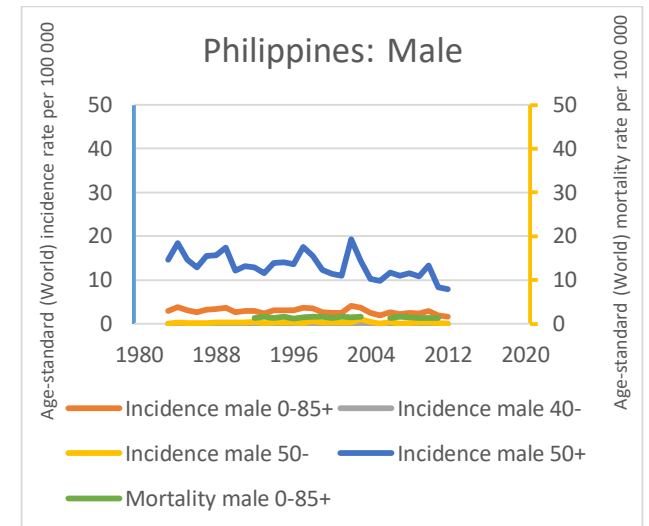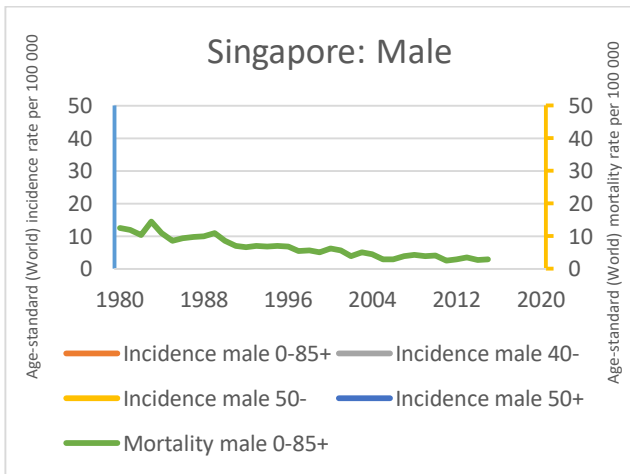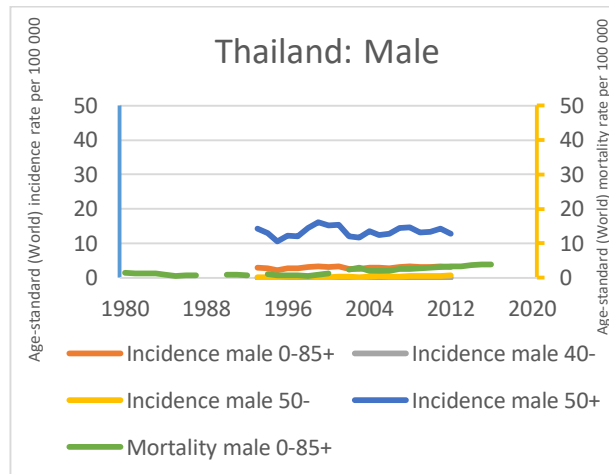

## Oceania

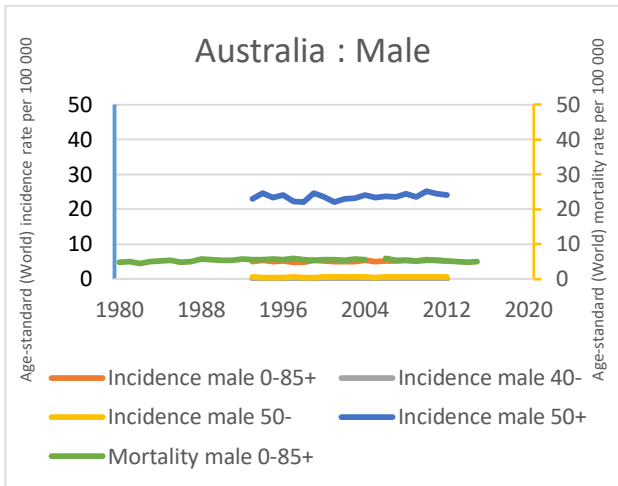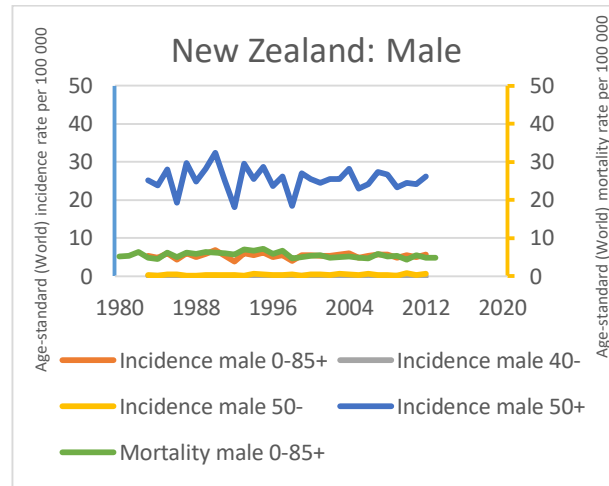

## Northern America

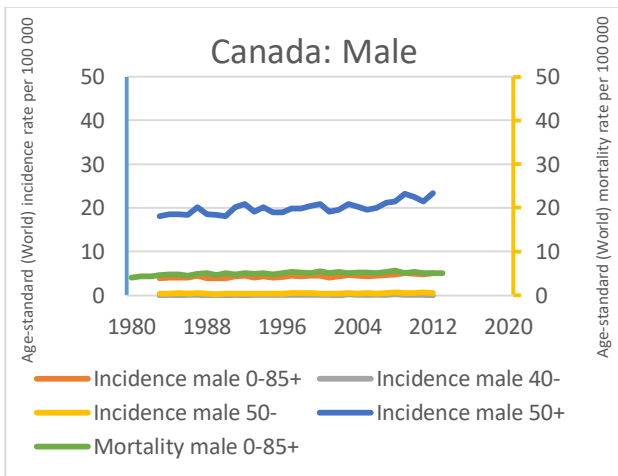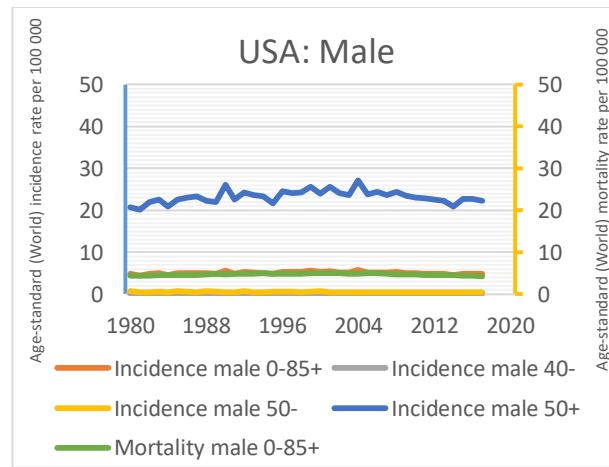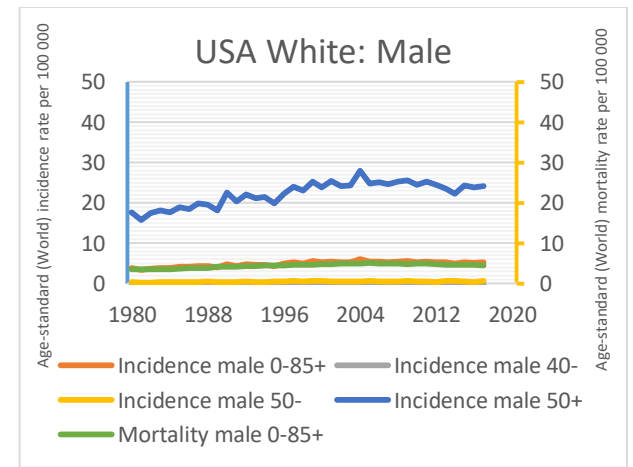

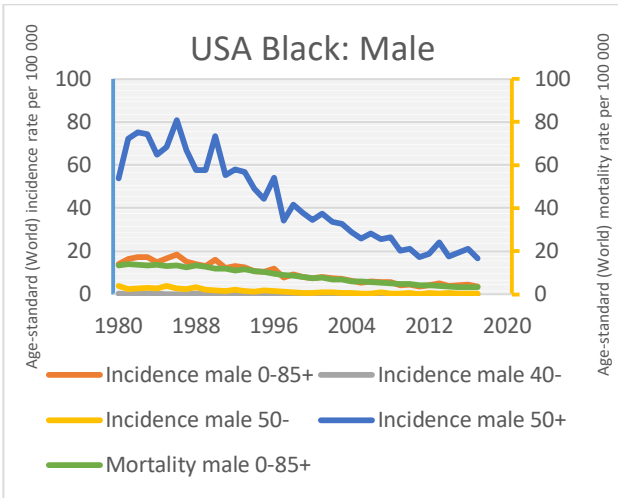

## Southern America

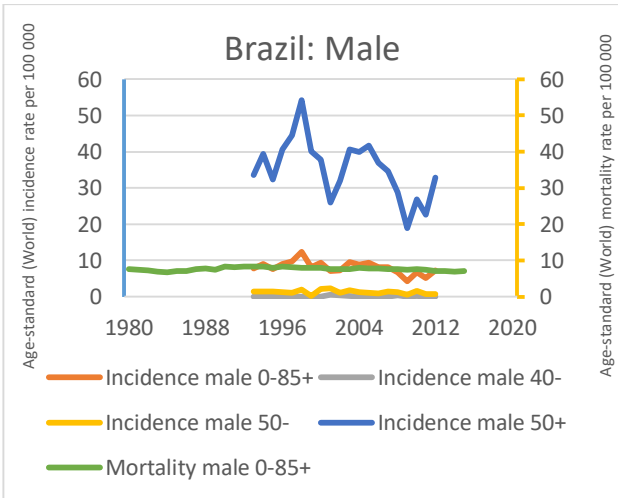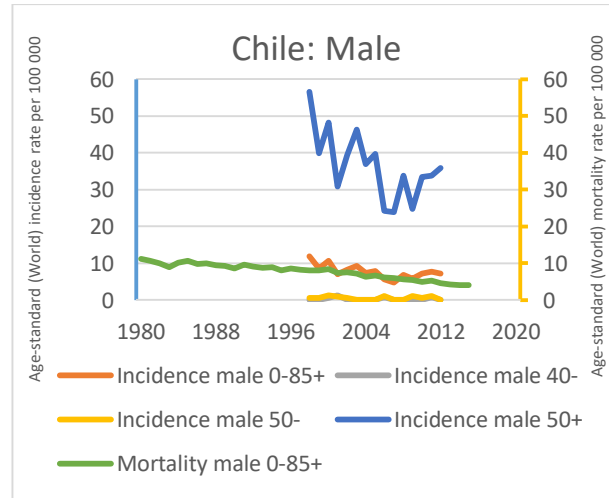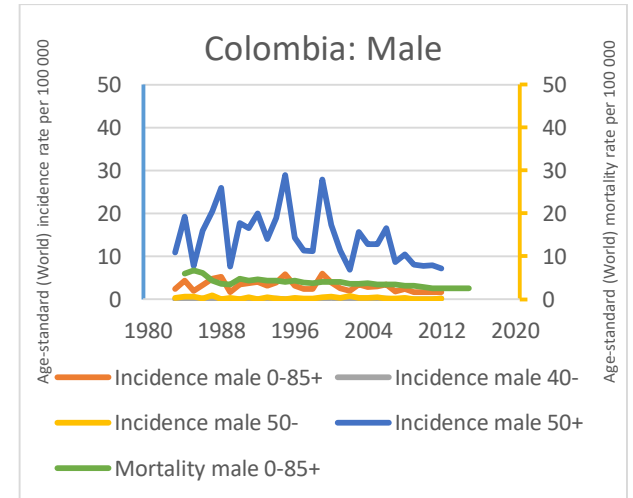

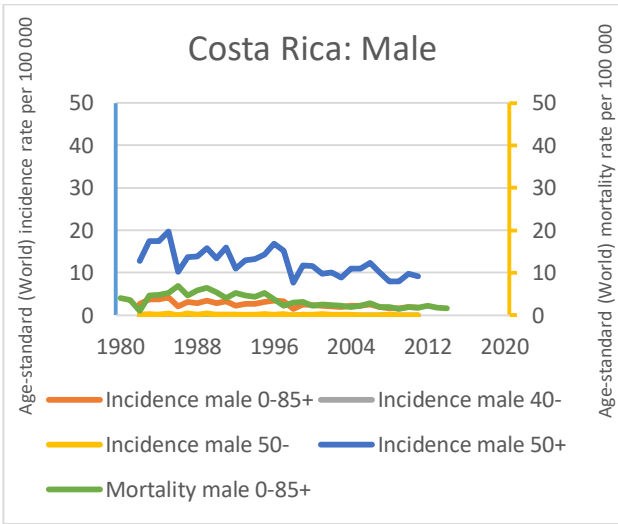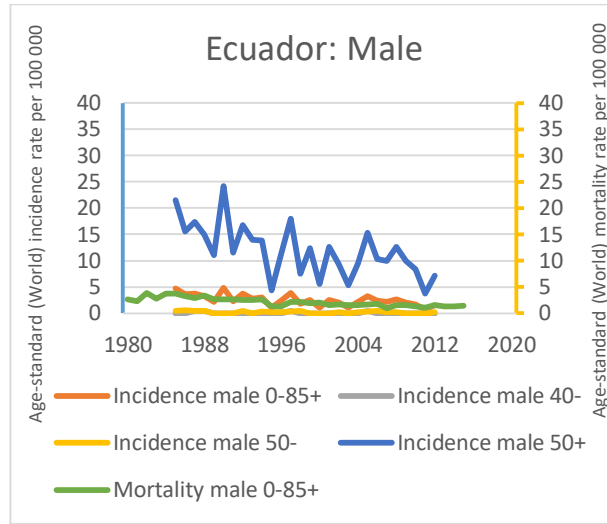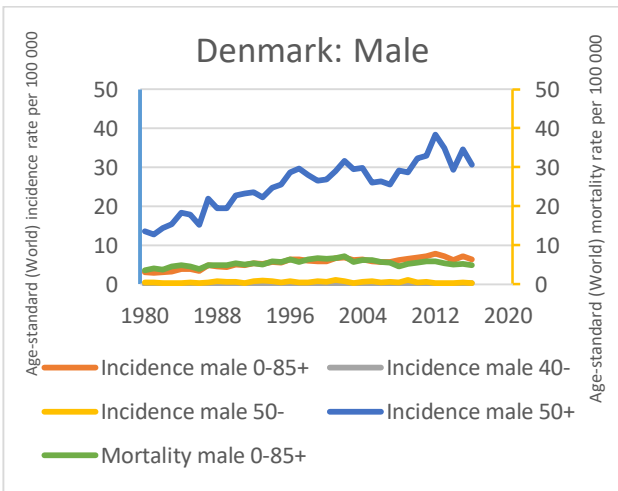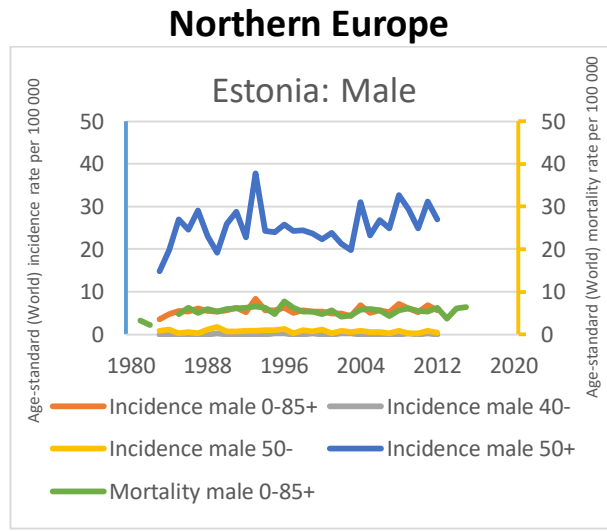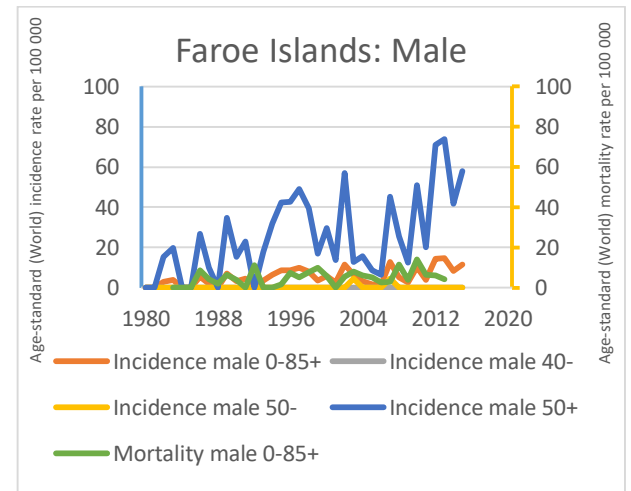

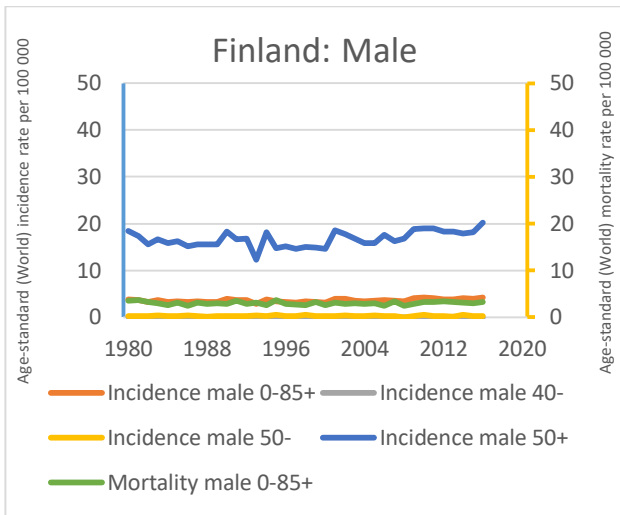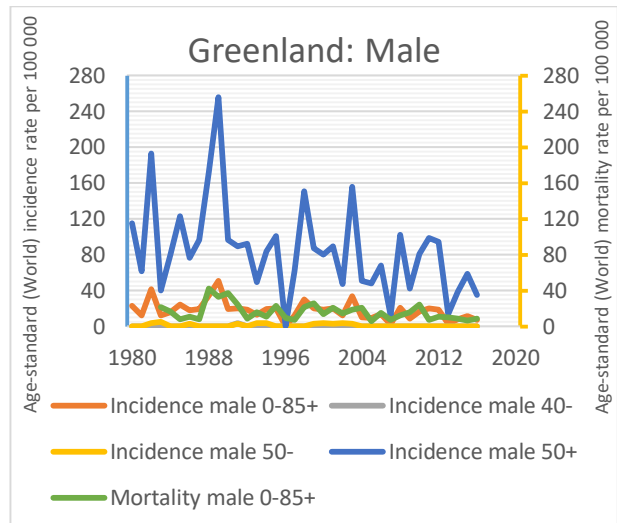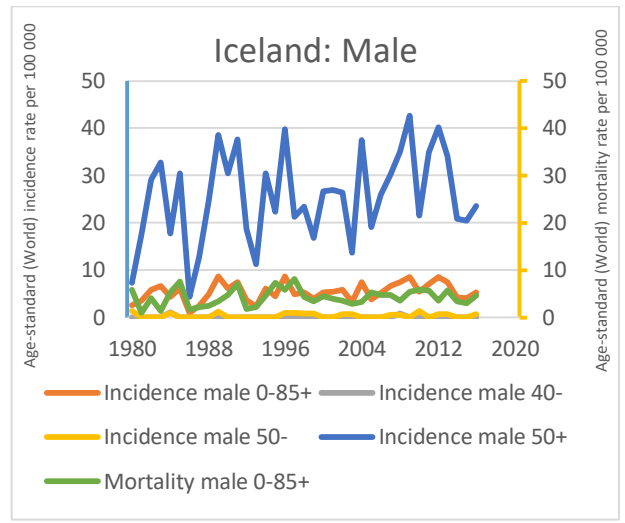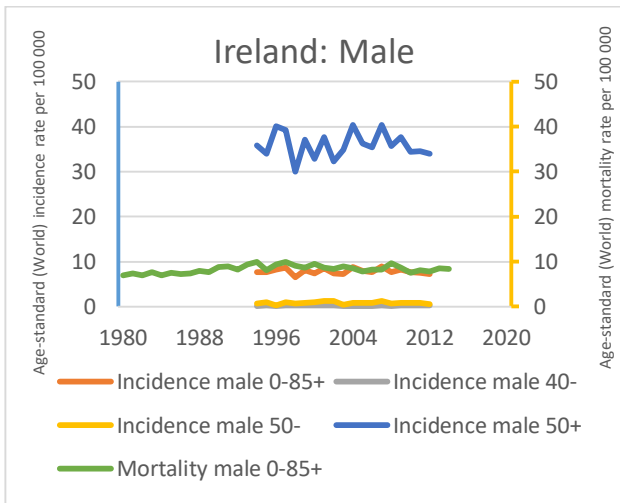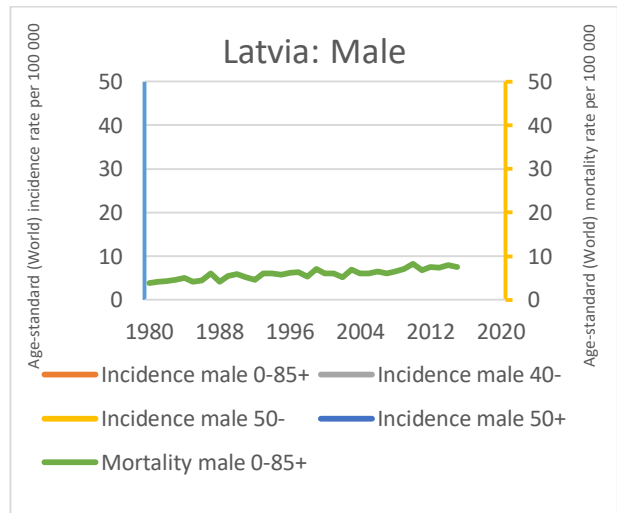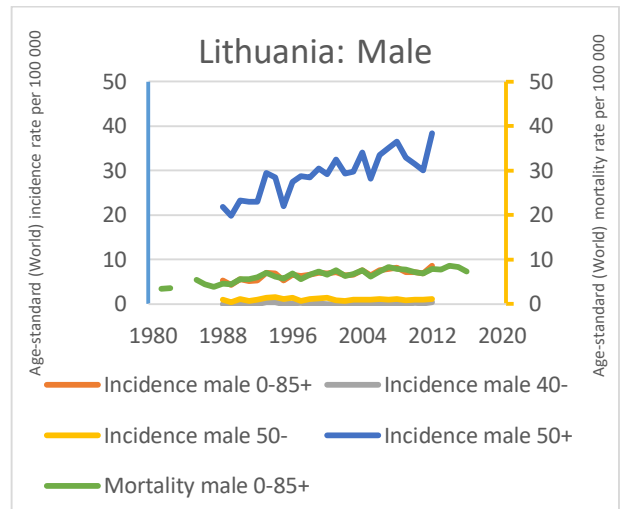

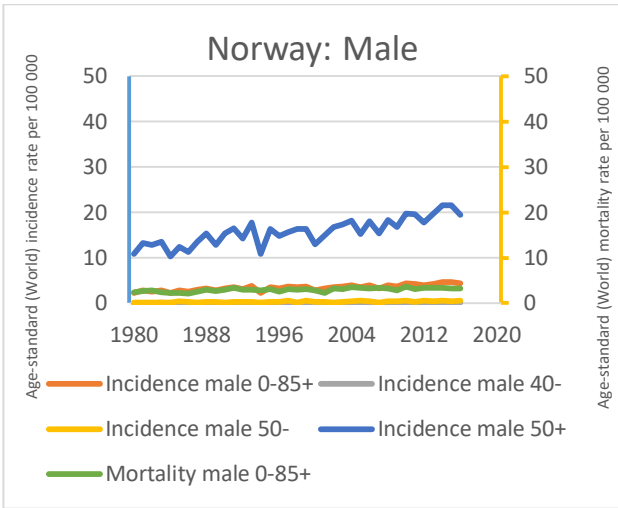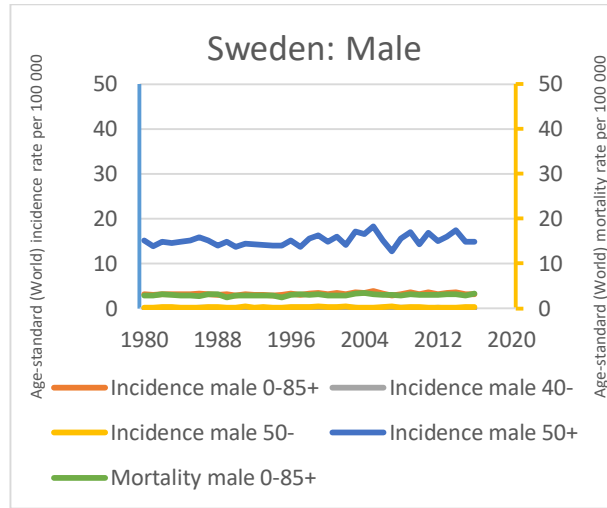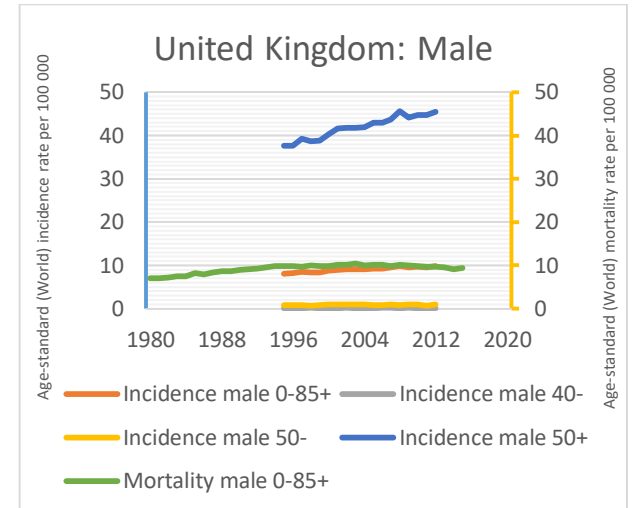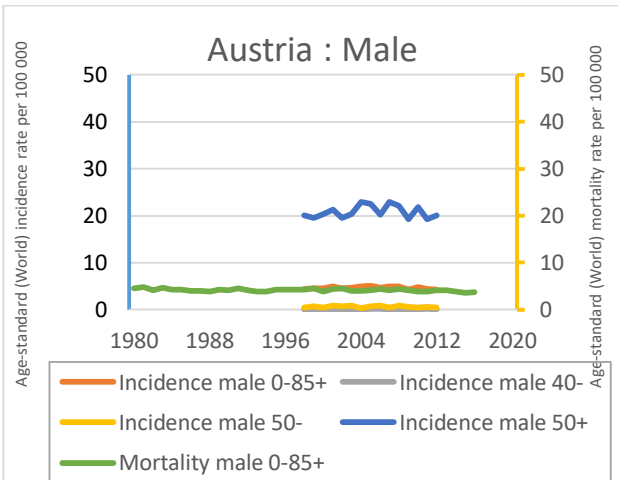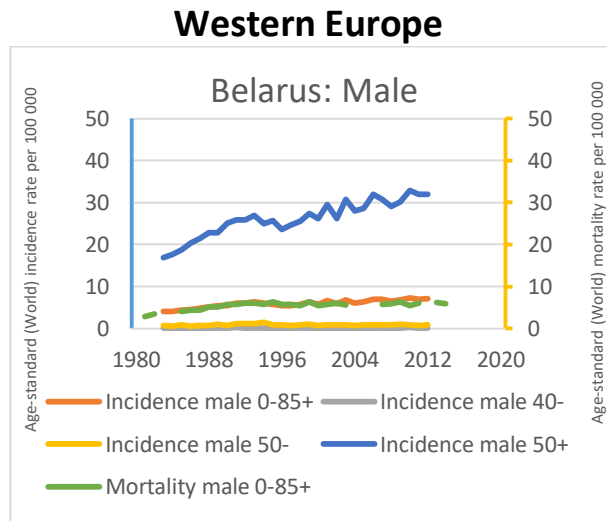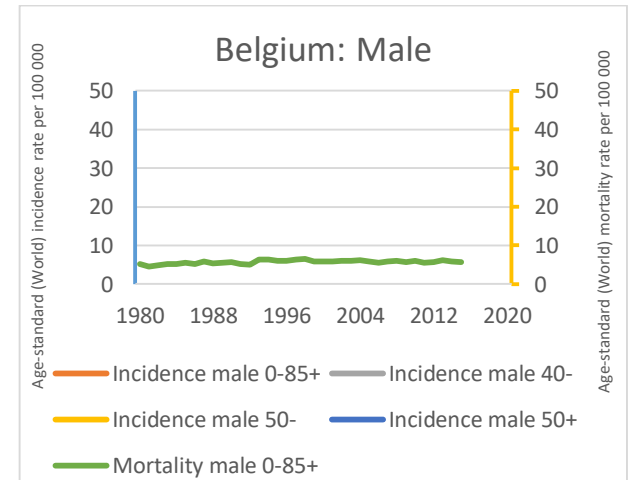

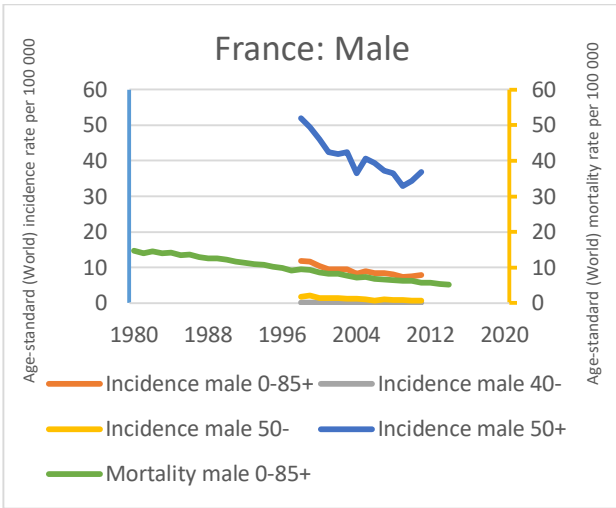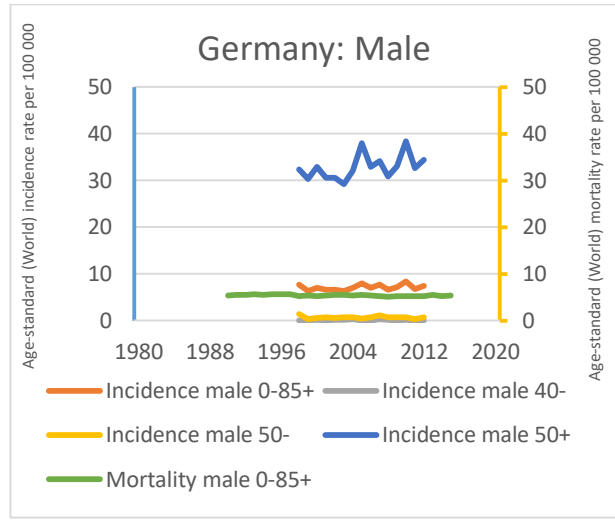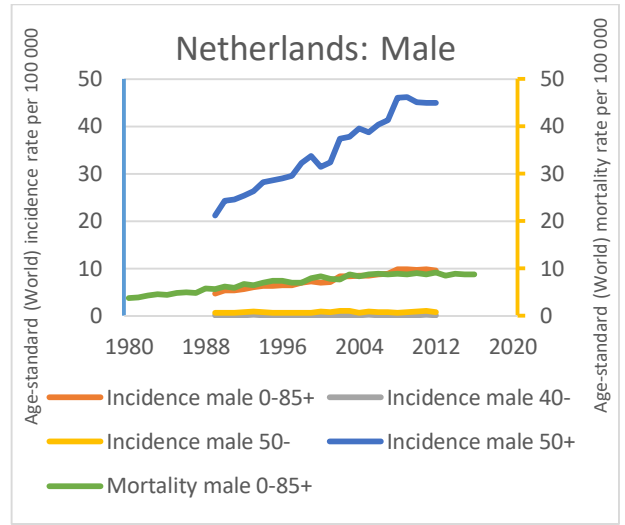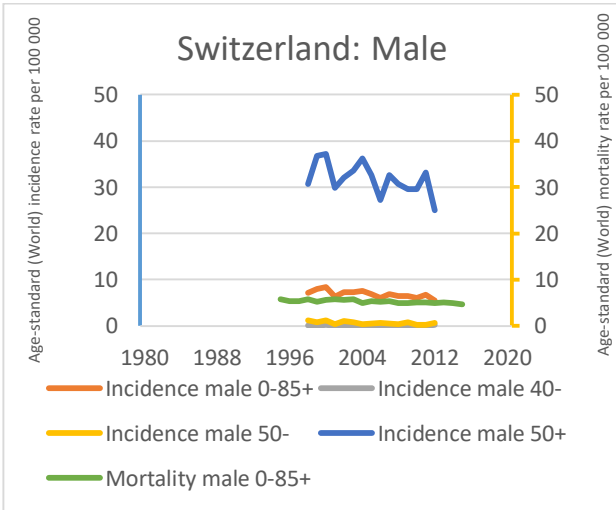



## Southern Europe

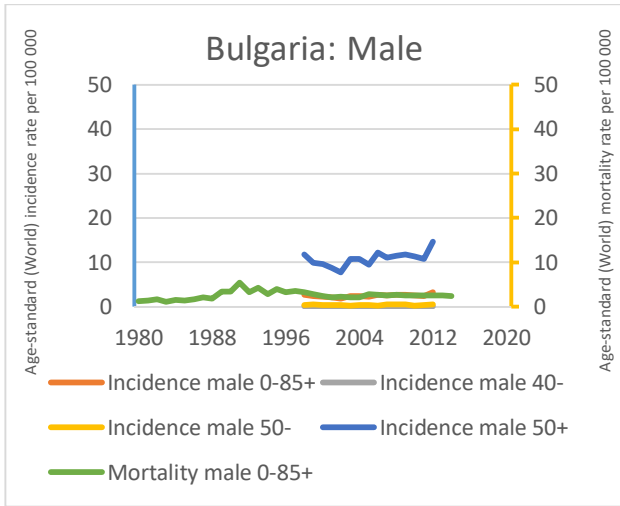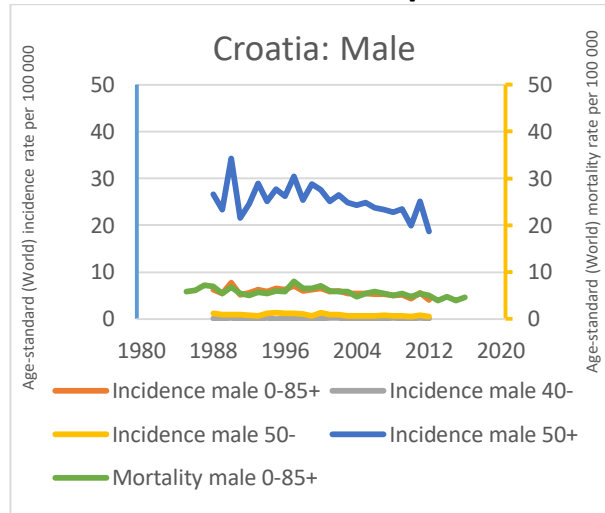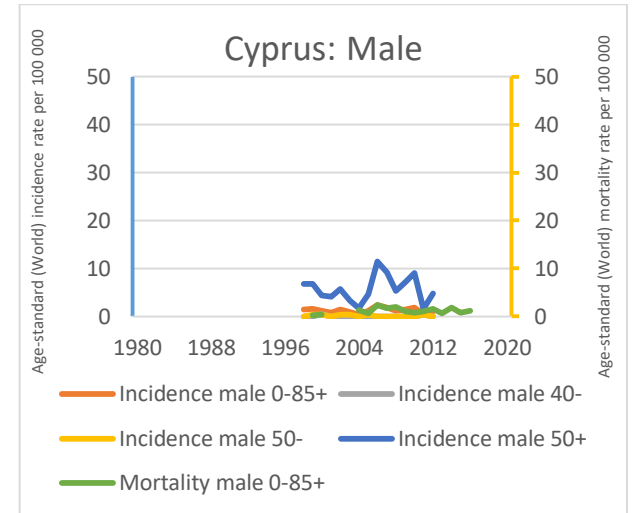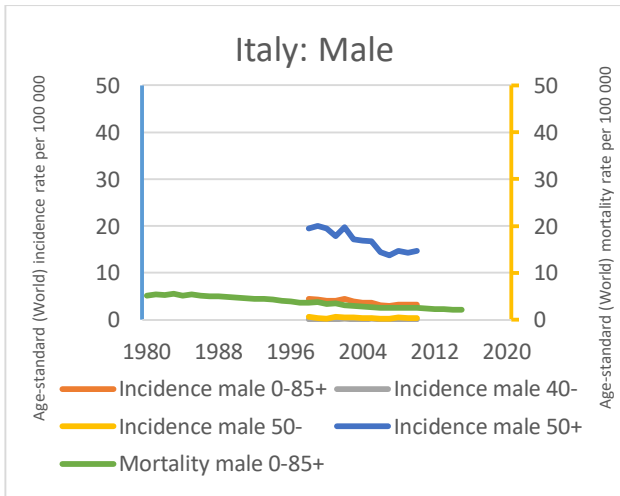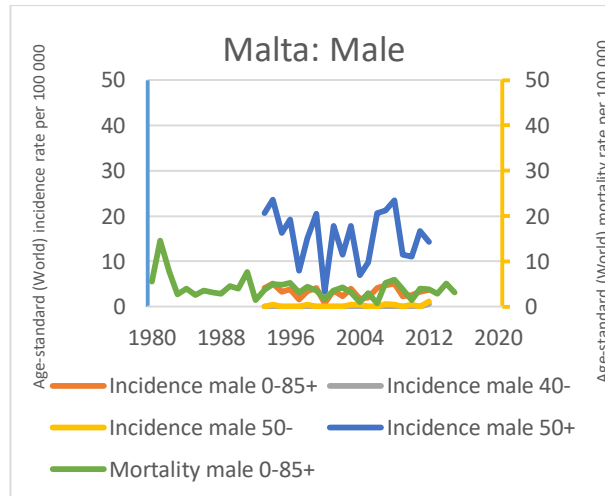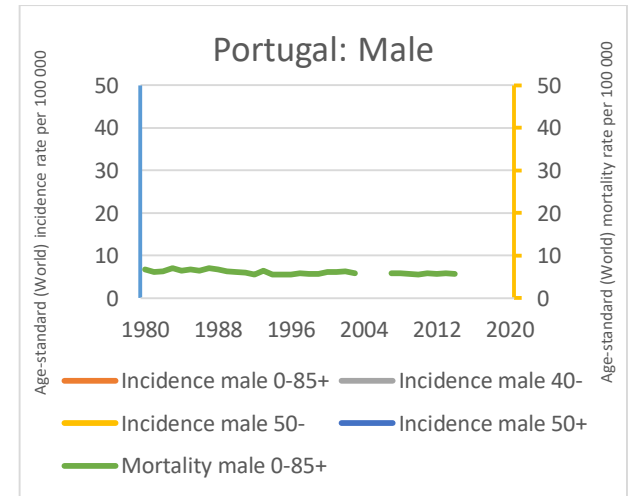

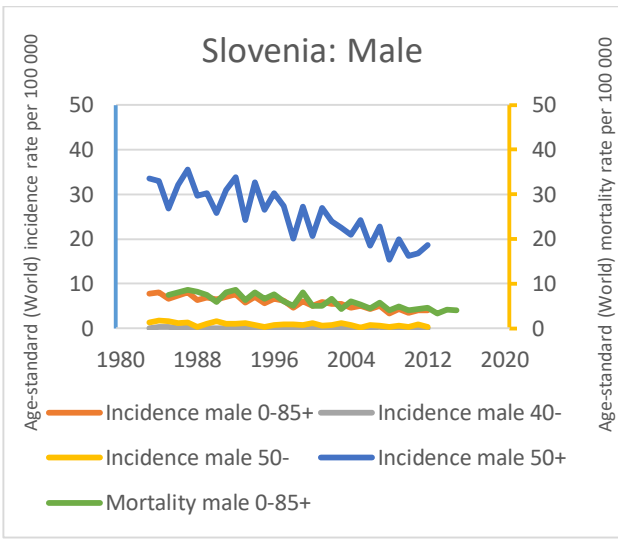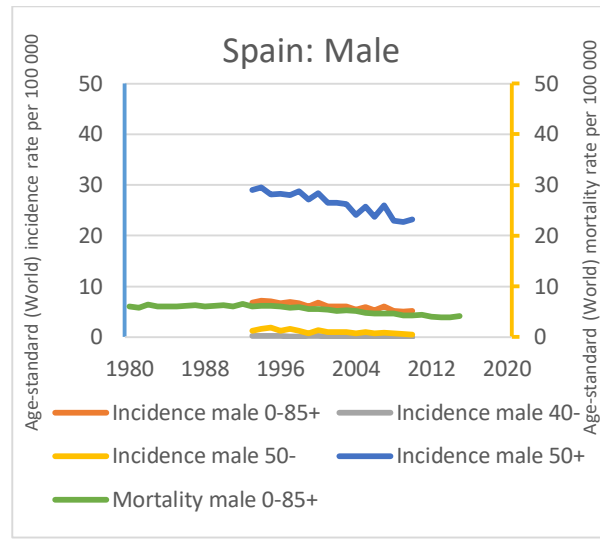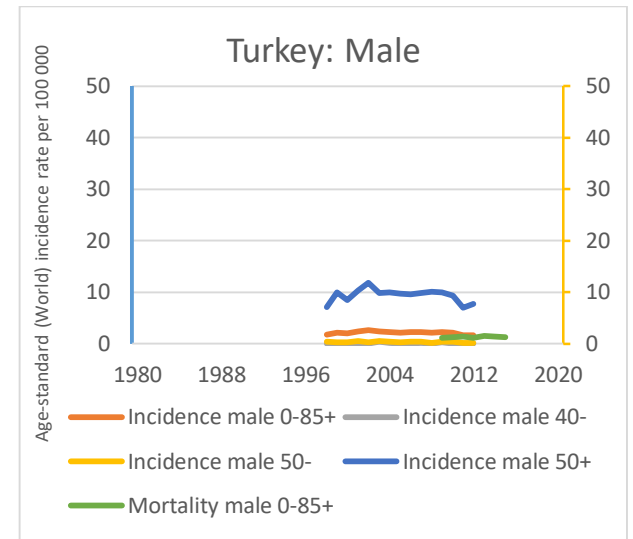

## Eastern Europe

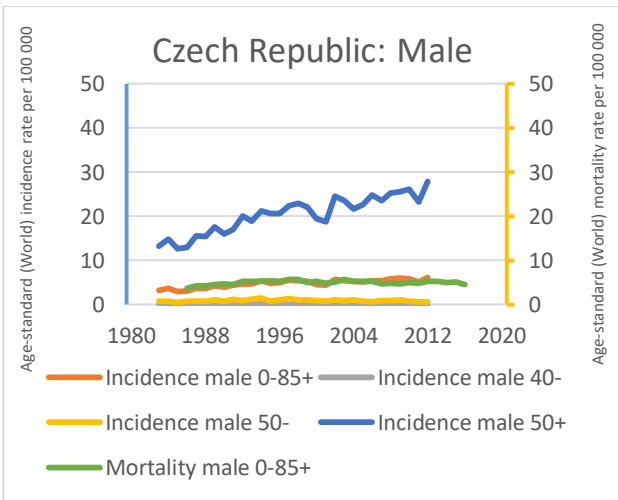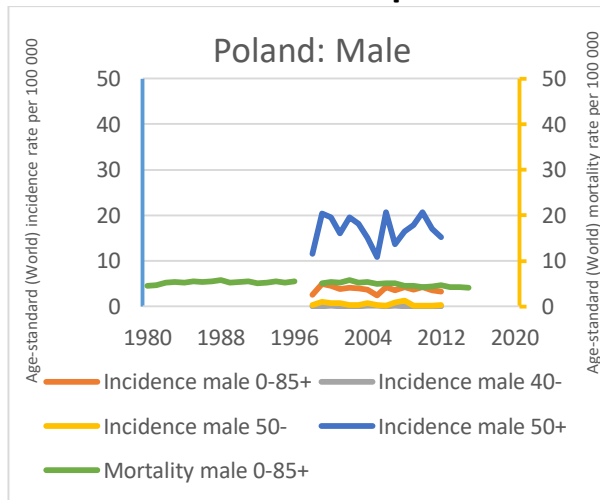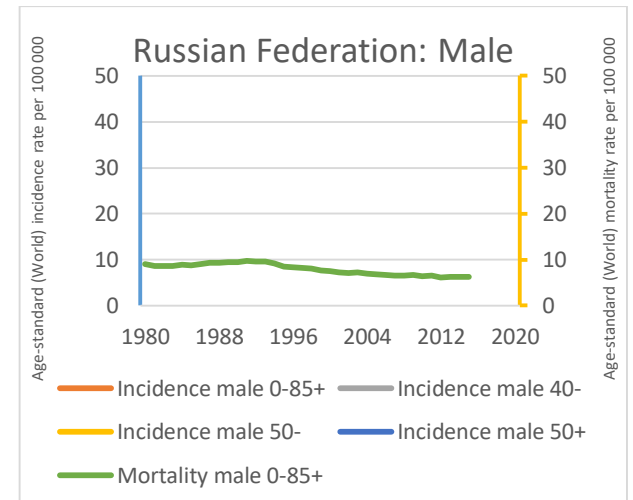

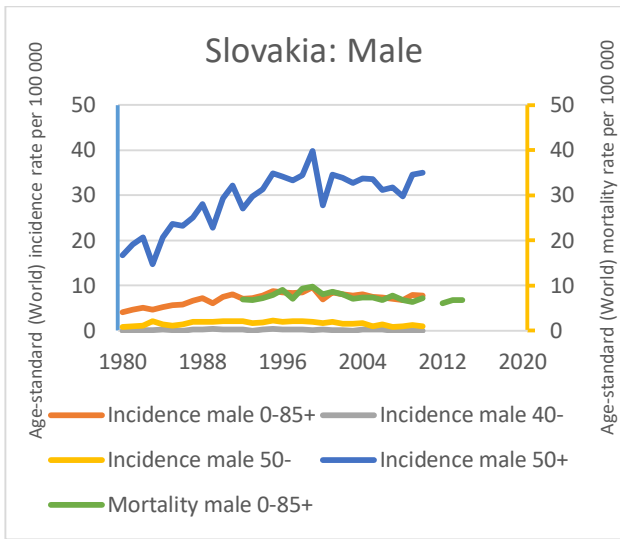

## Africa

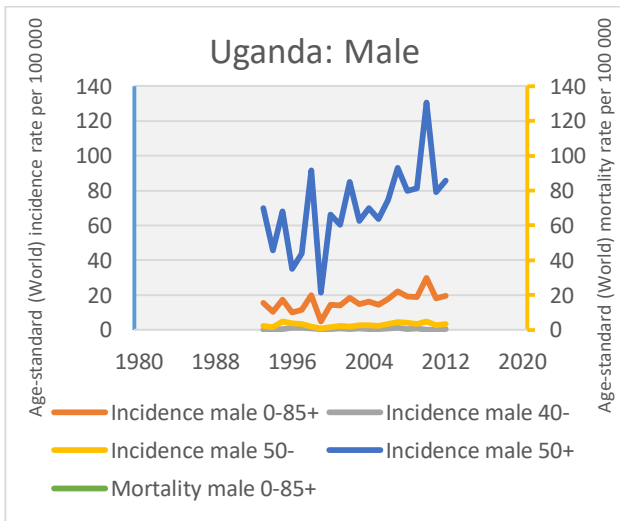

Female

Asia

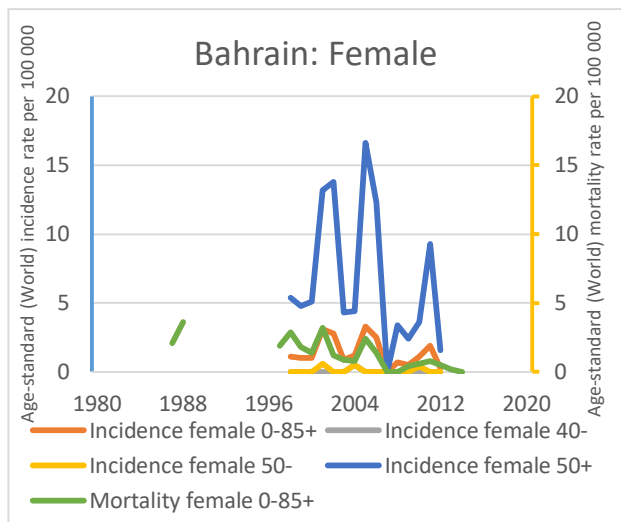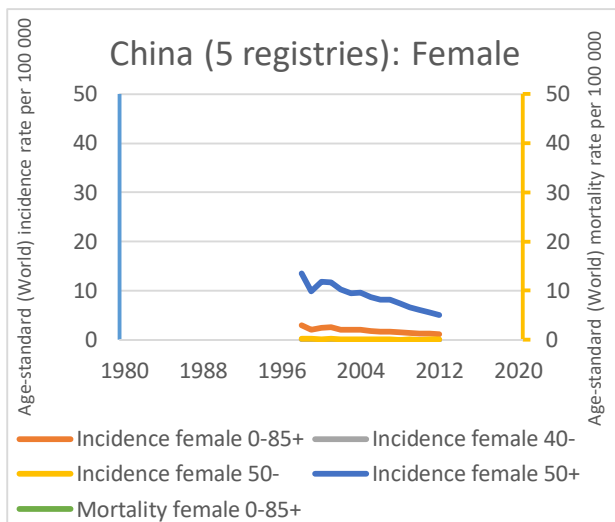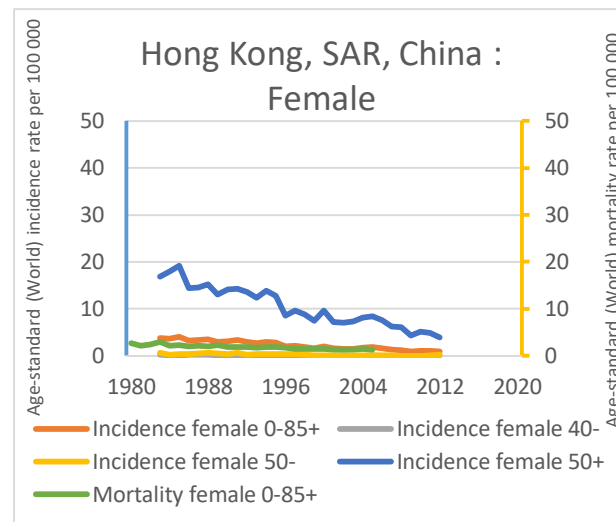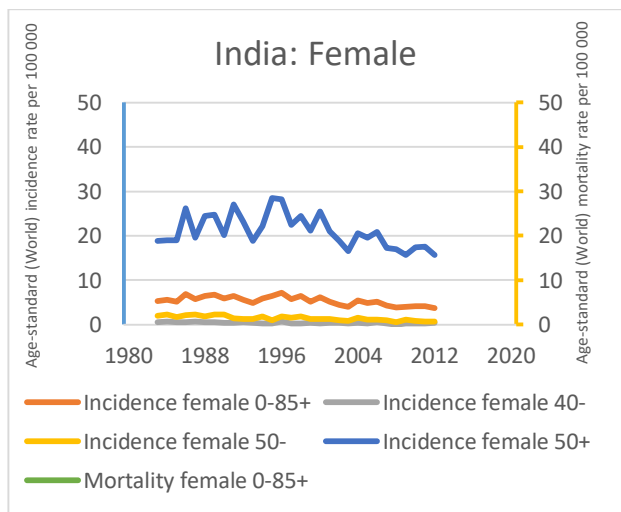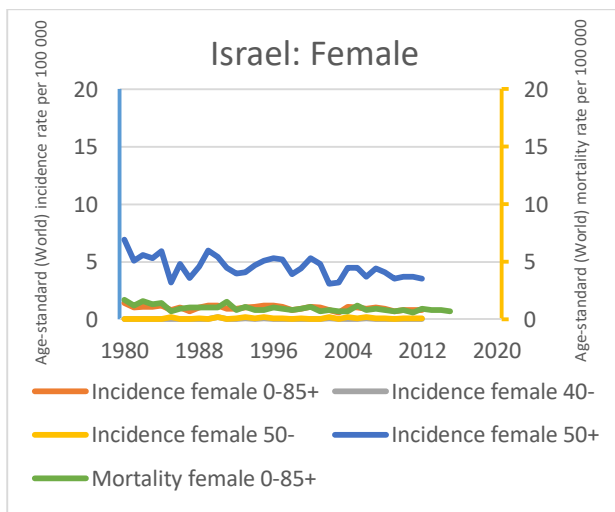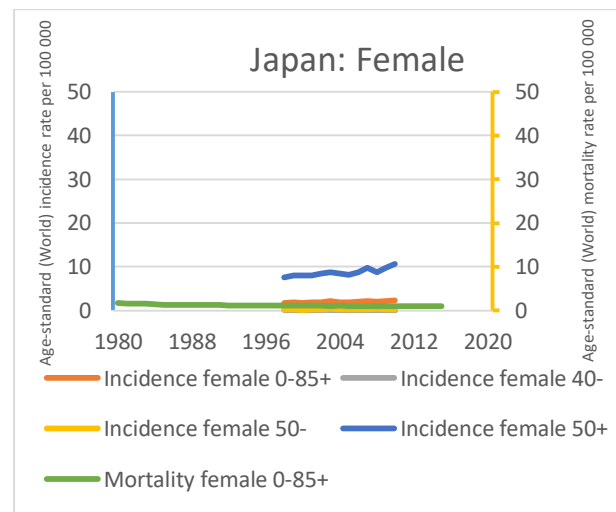

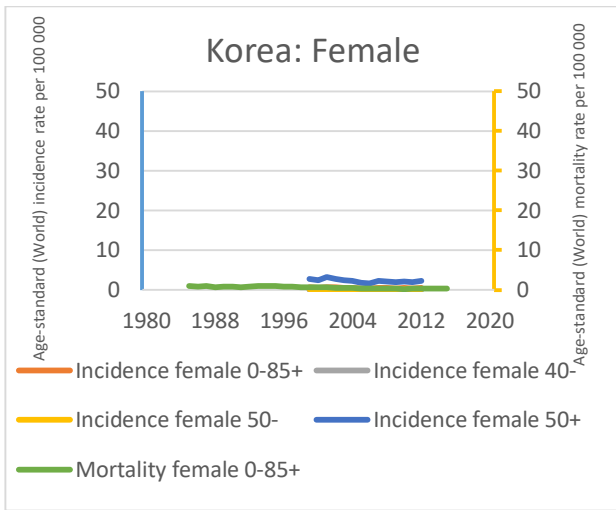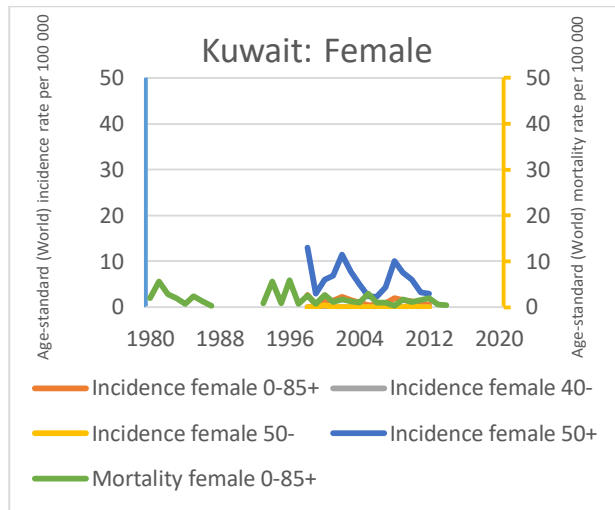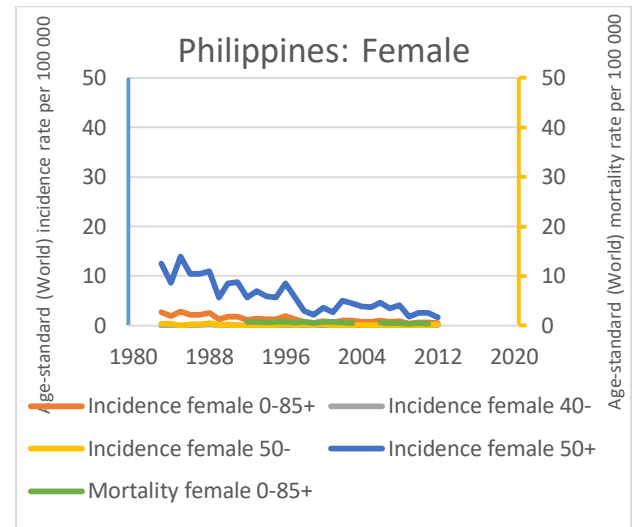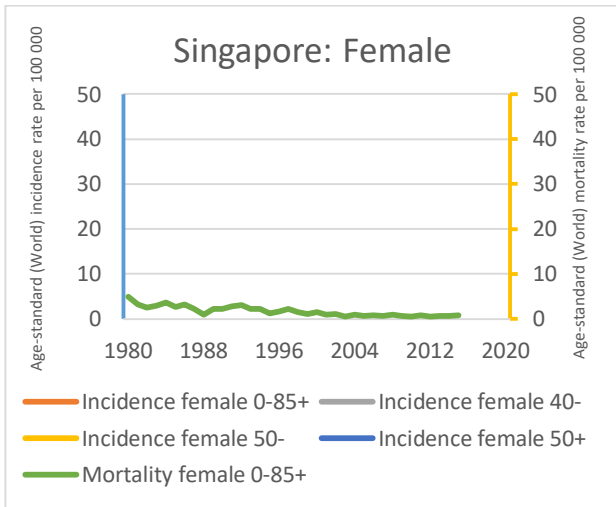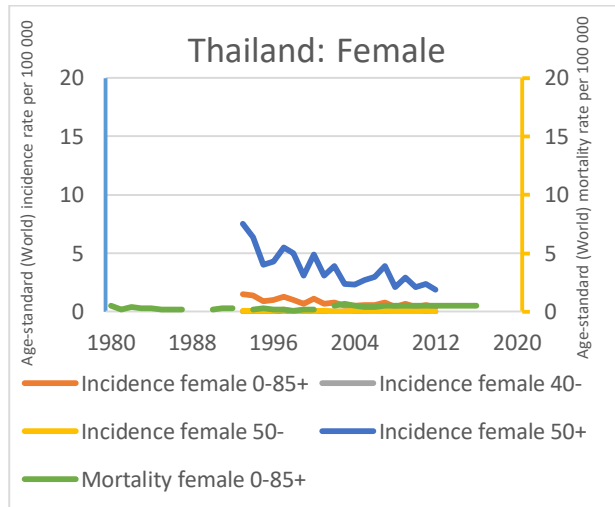

## Oceania

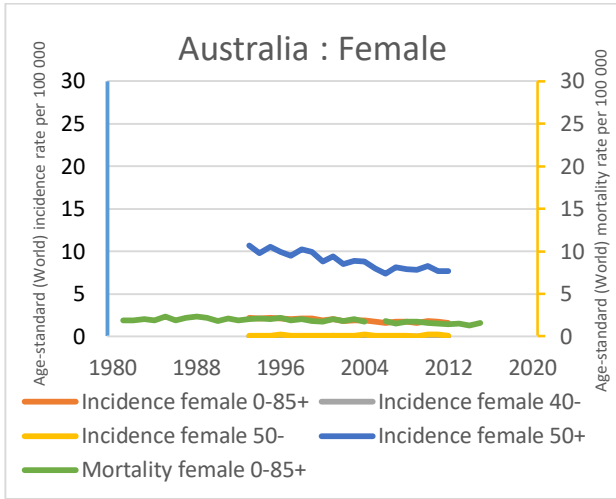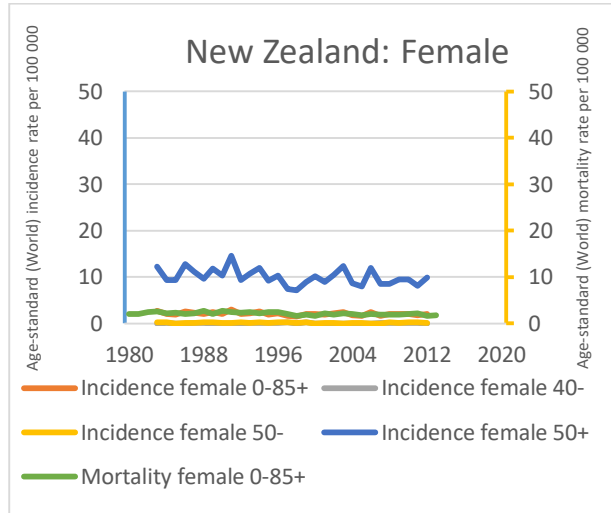

## Northern America

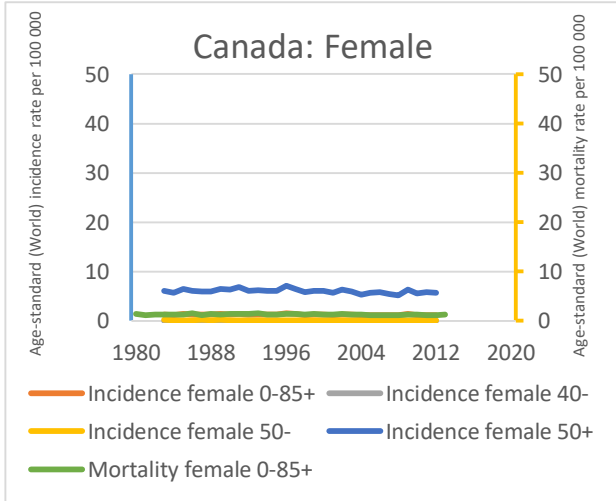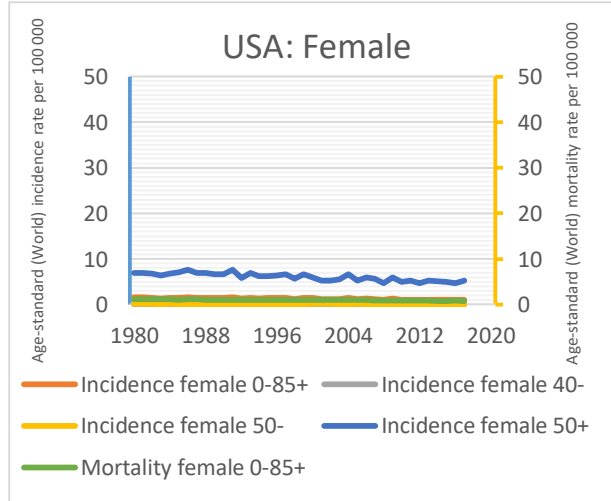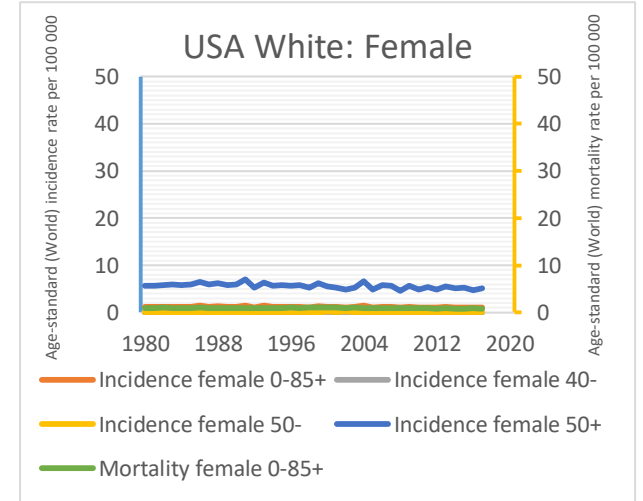

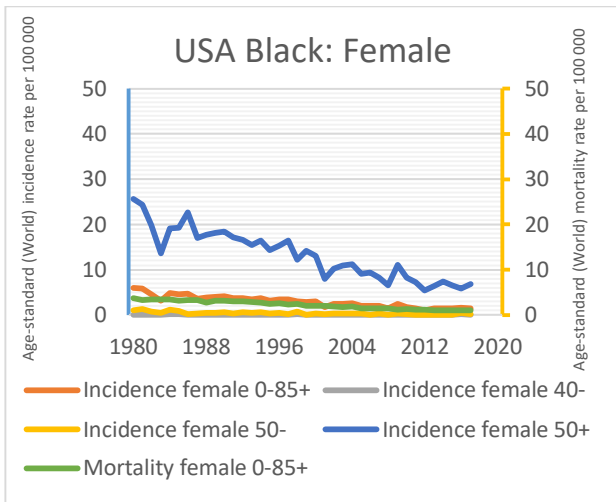

## Southern America

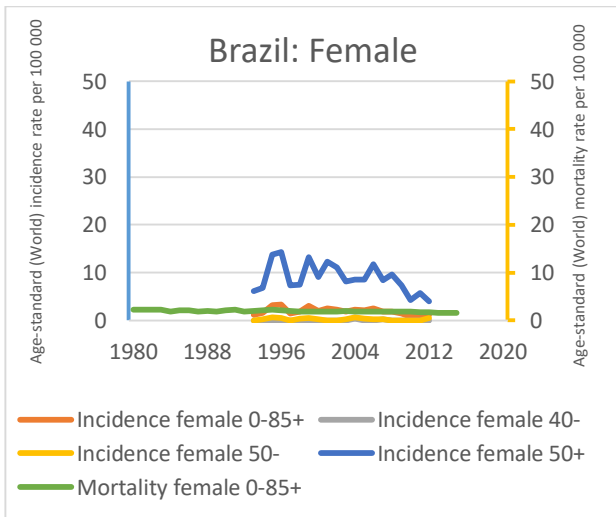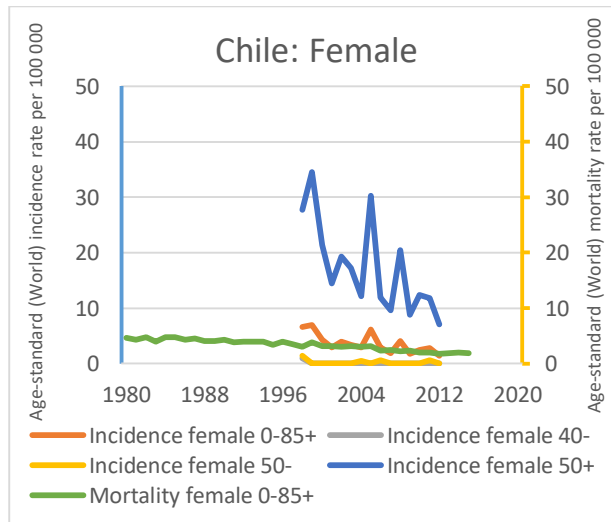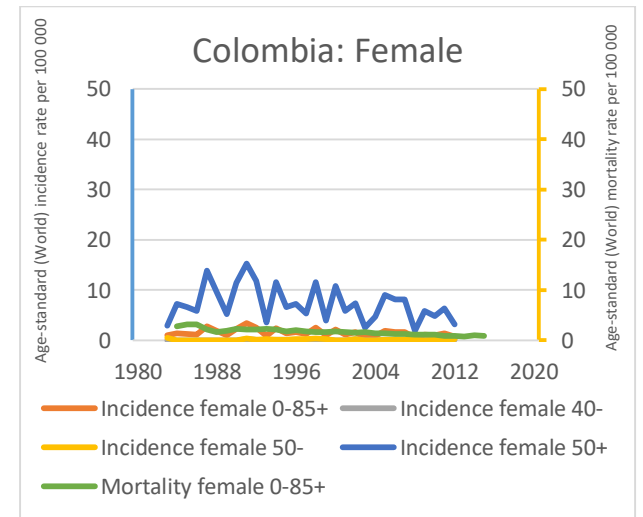

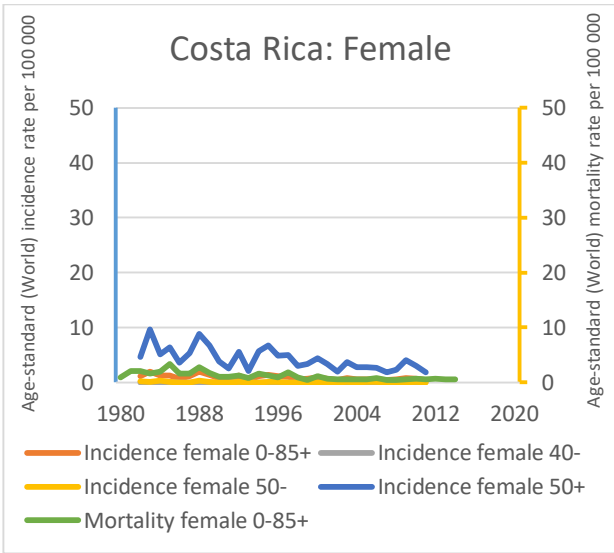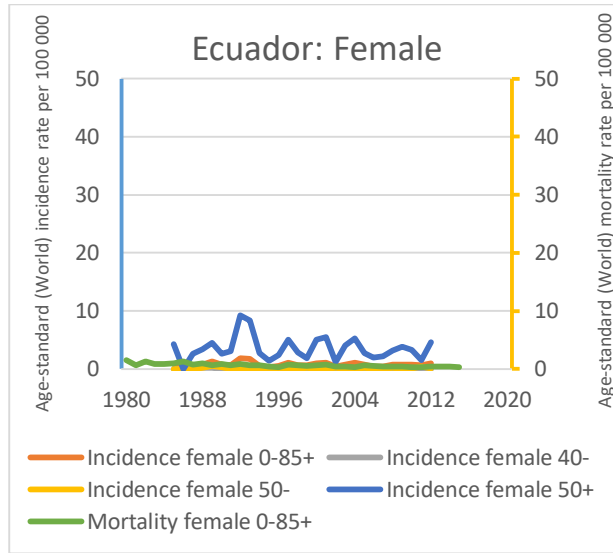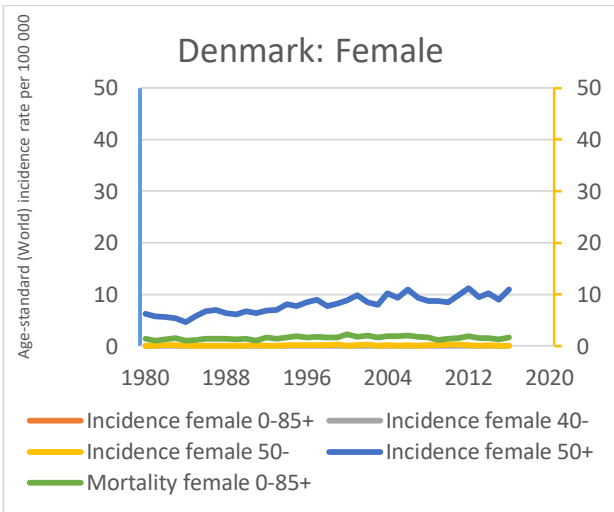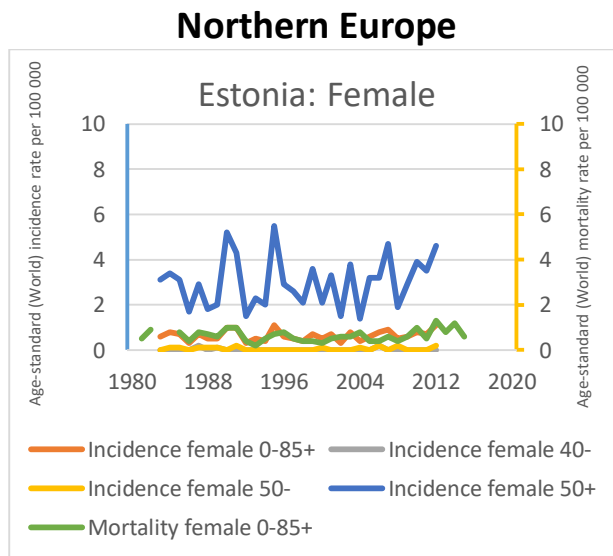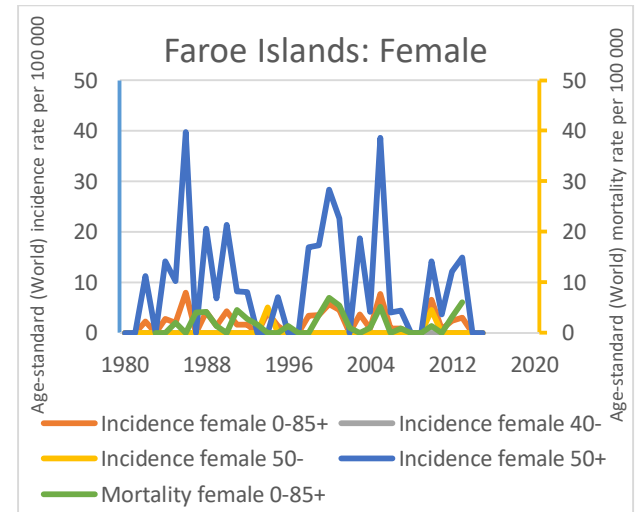



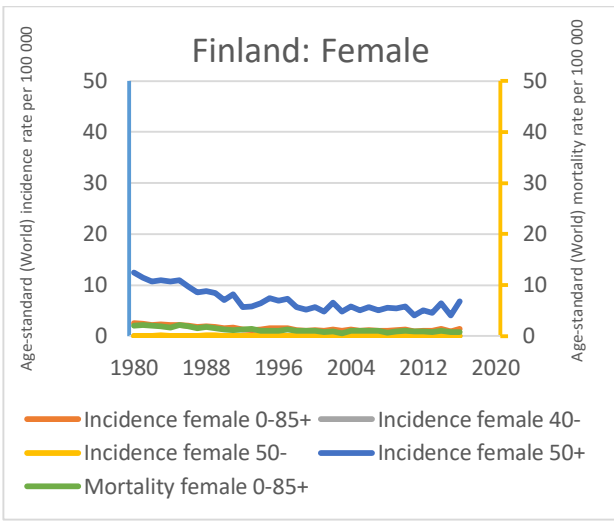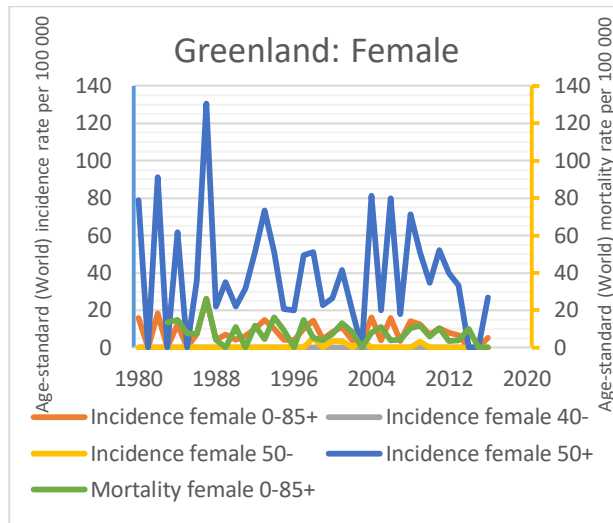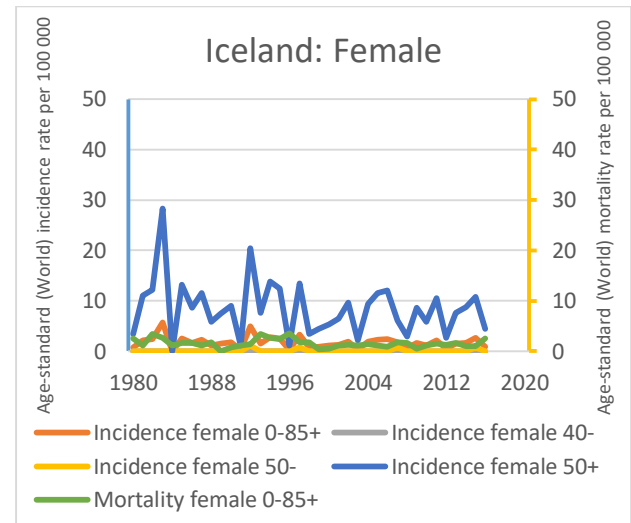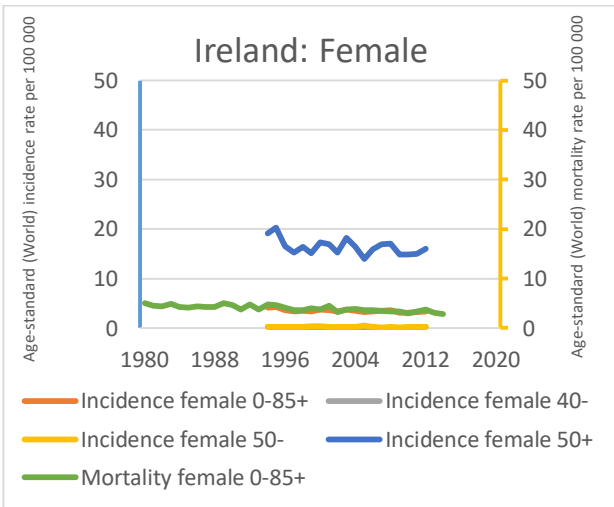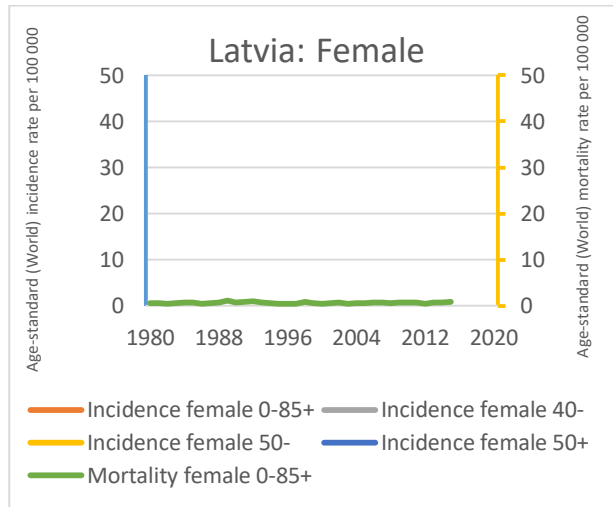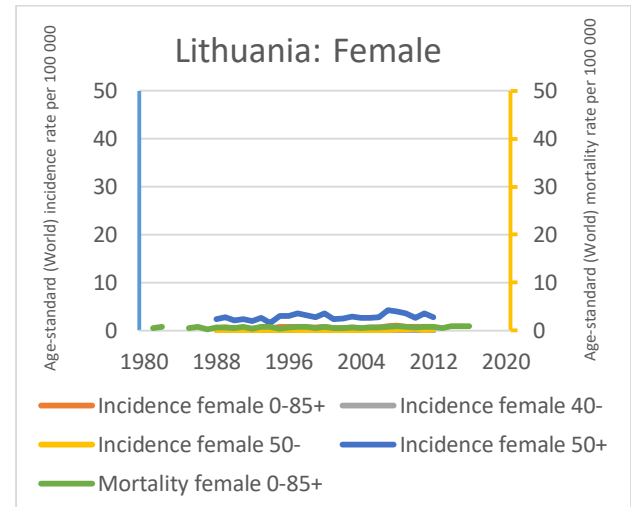

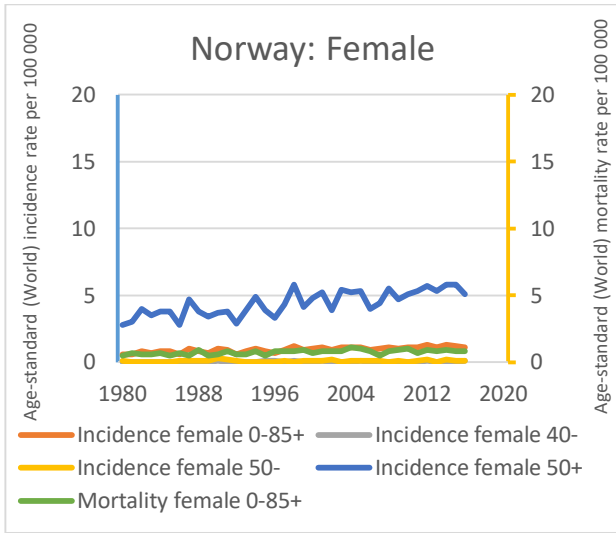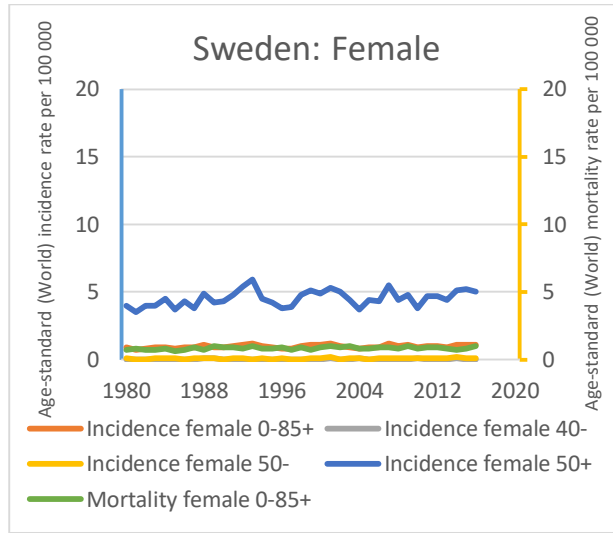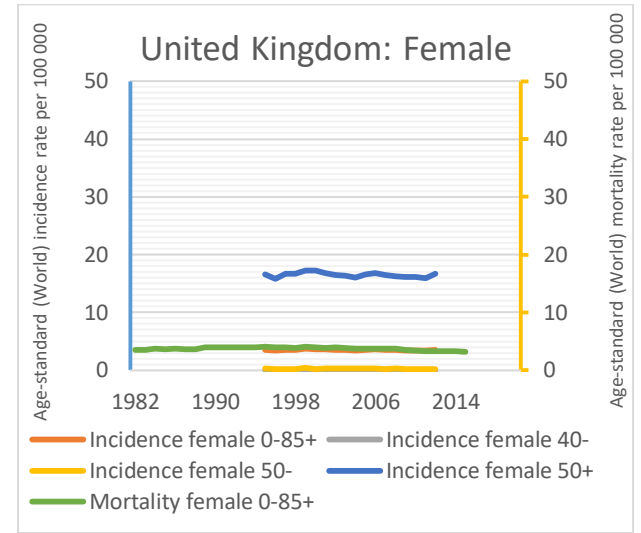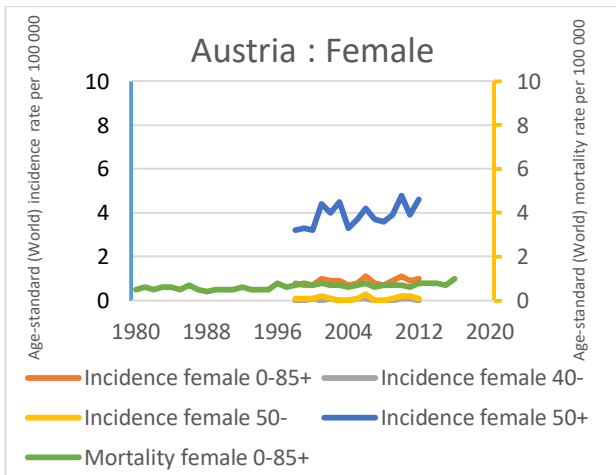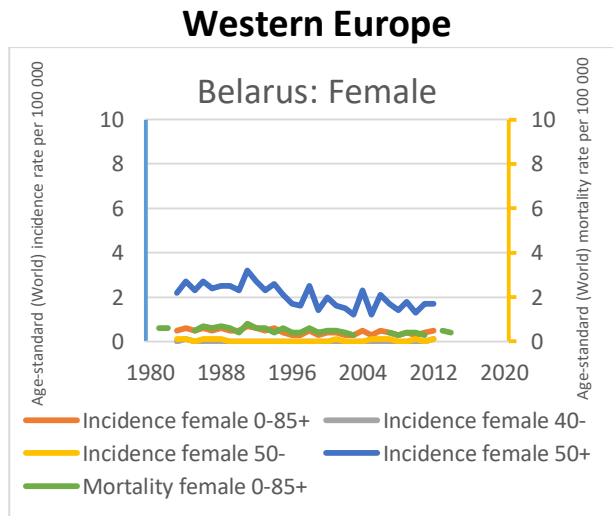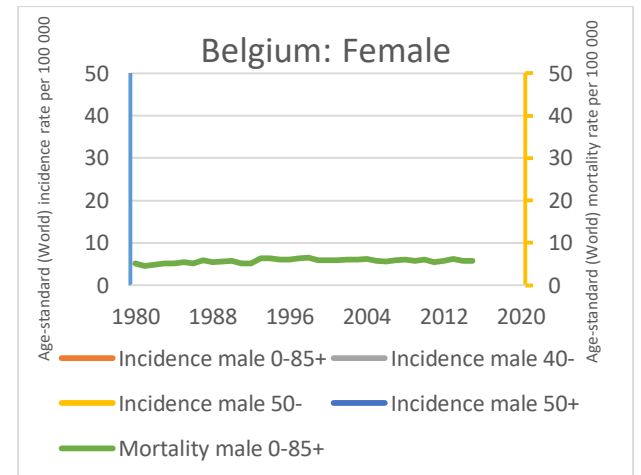

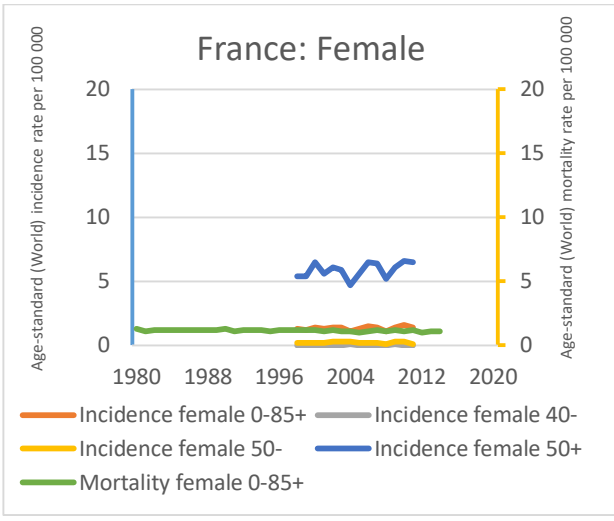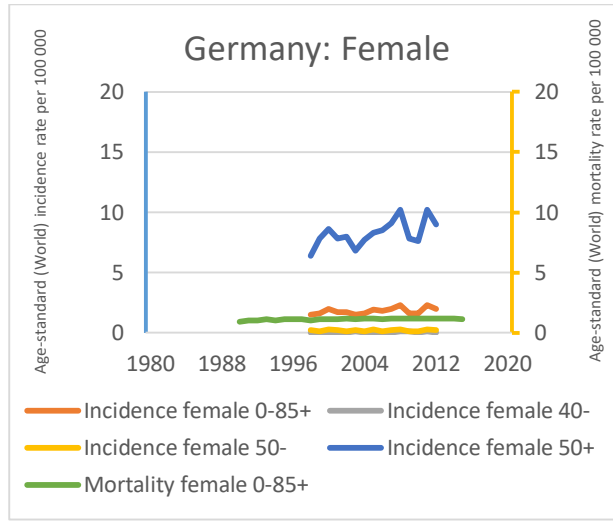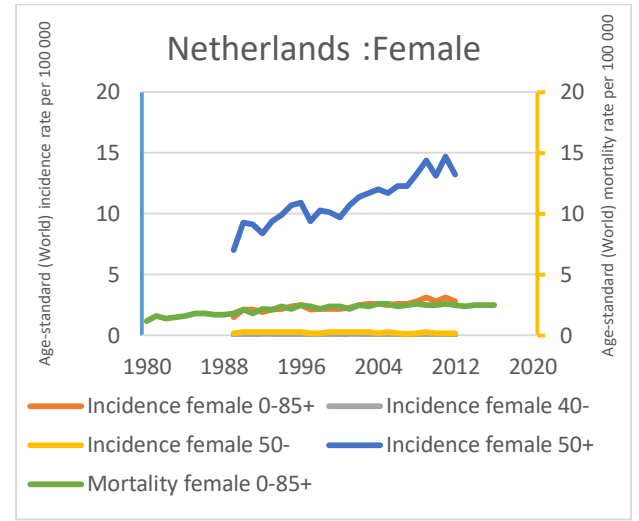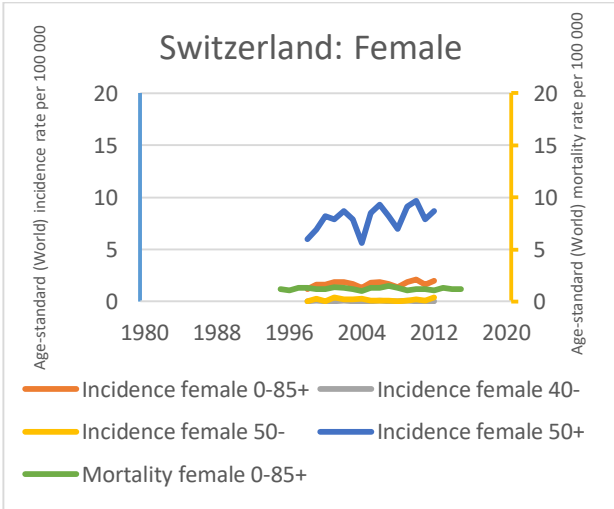

## Southern Europe

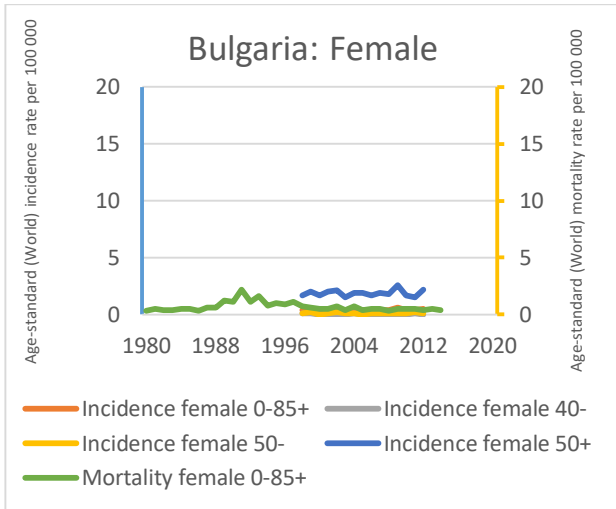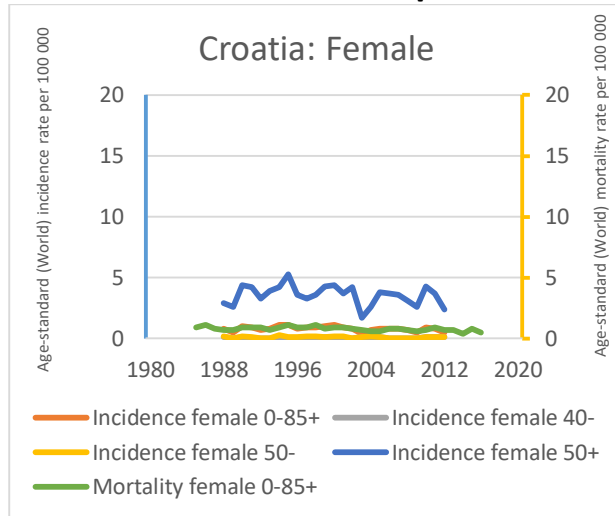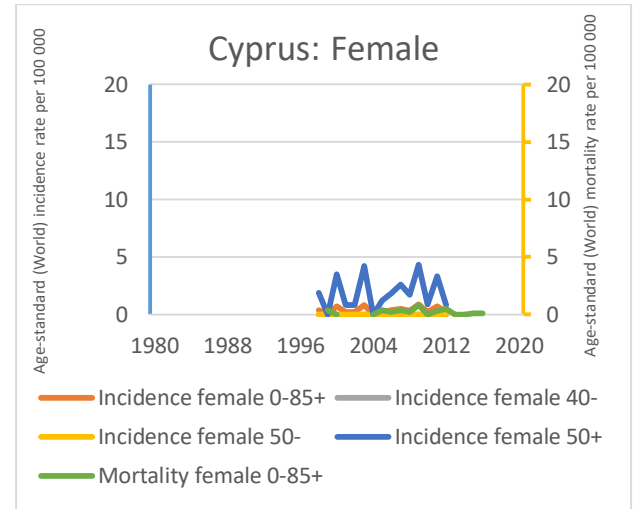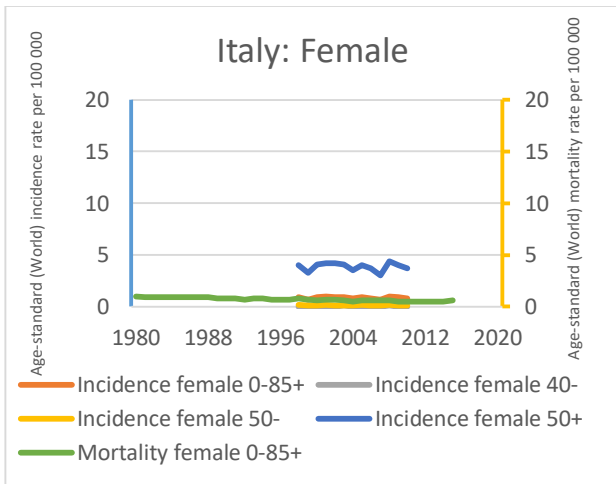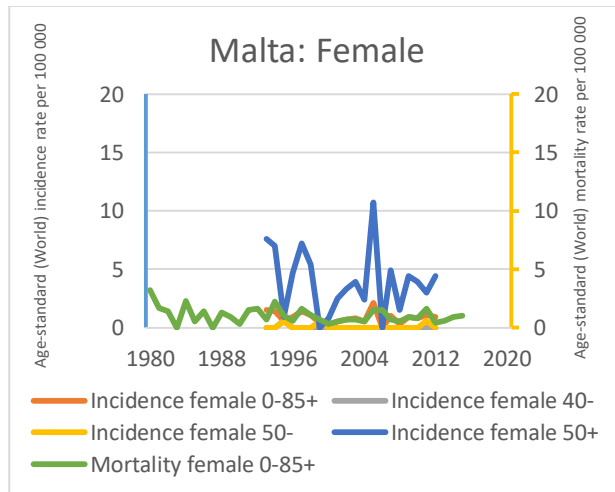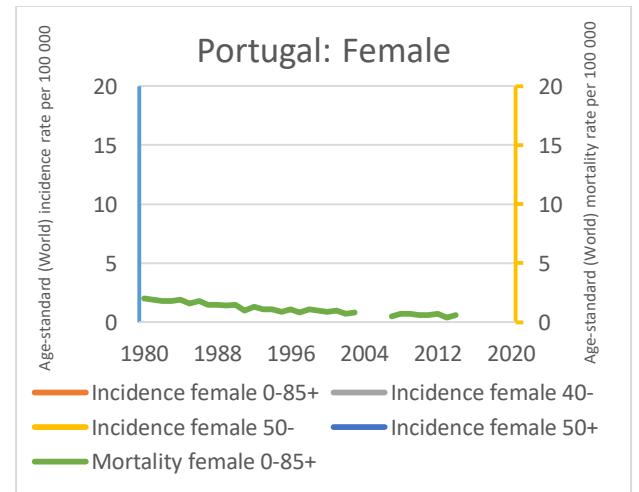

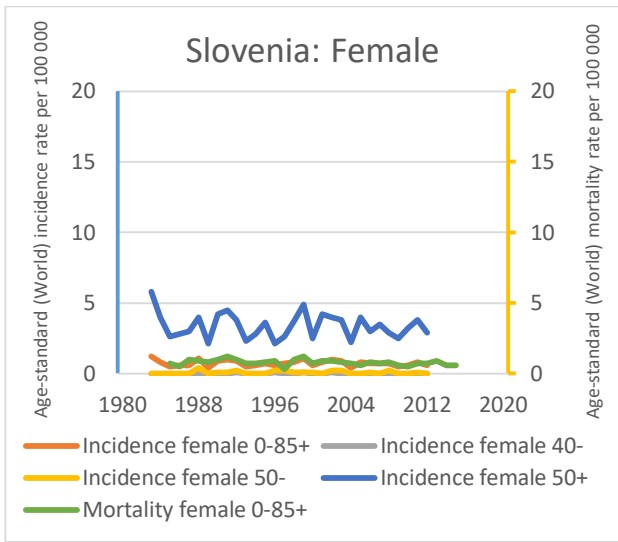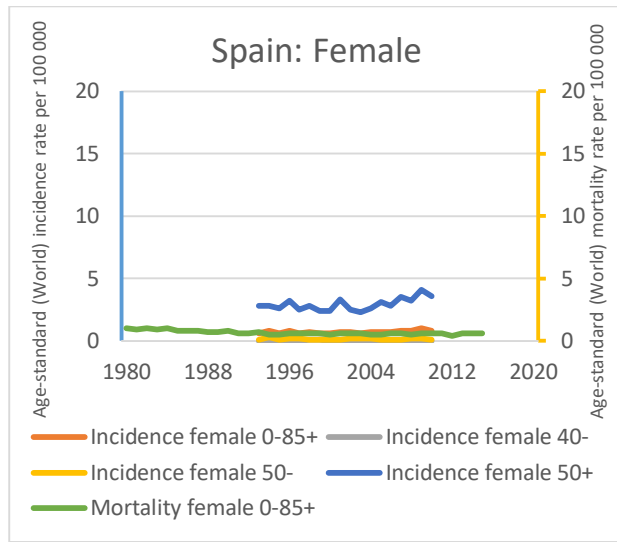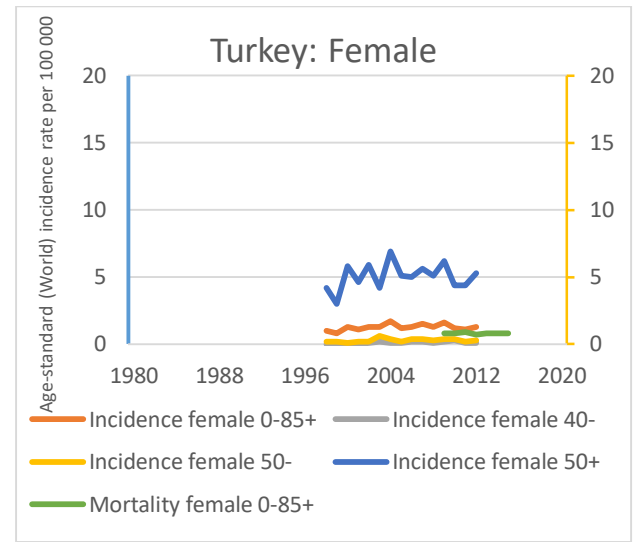

## Eastern Europe

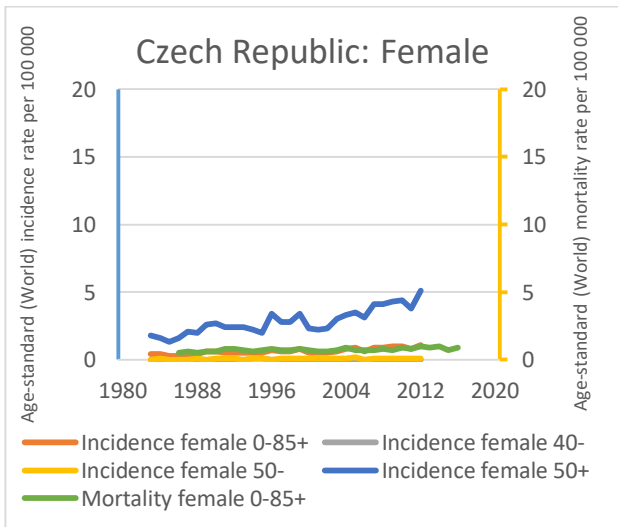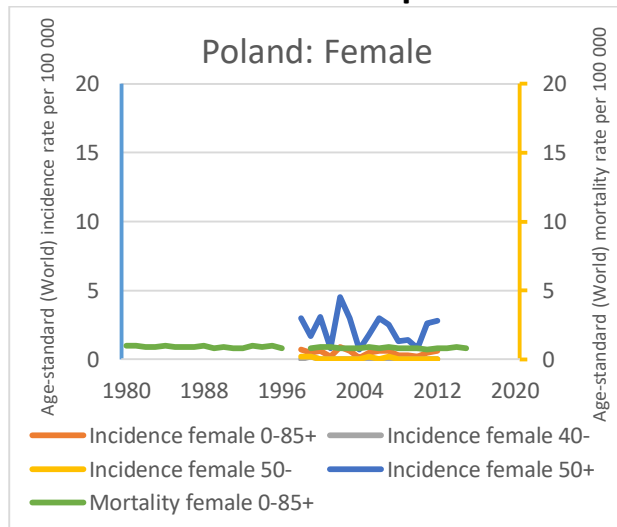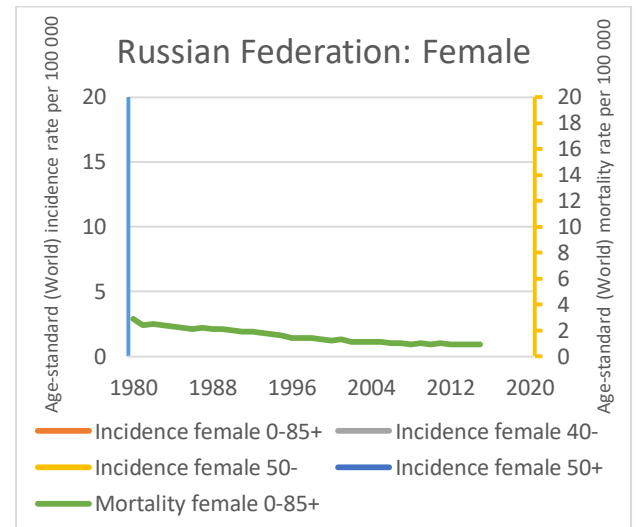

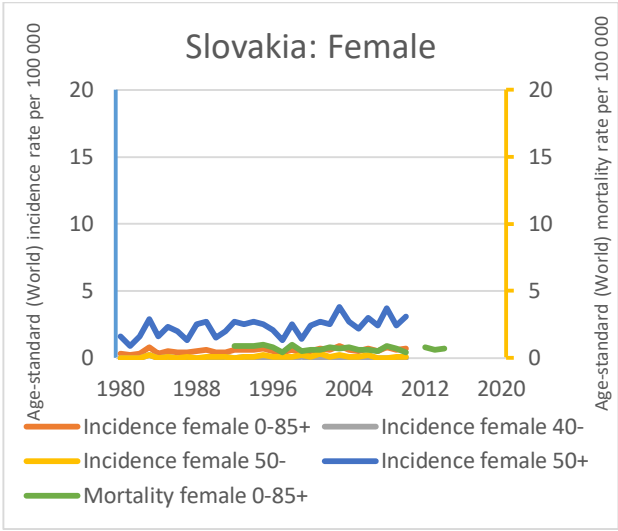

## Africa

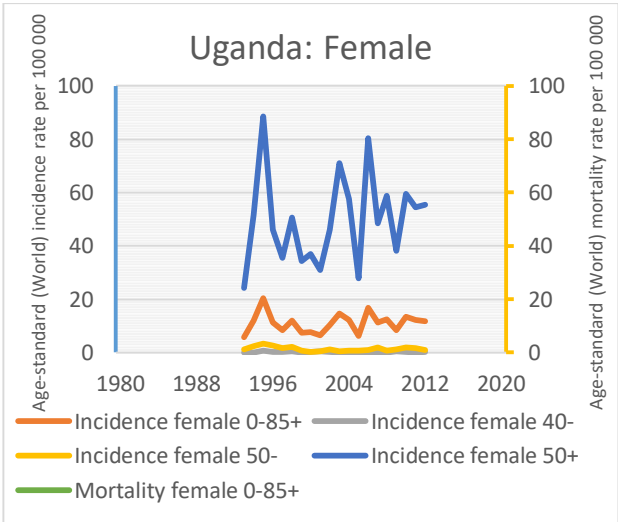

**Figure S2. The joinpoint regression analysis of esophageal cancer**

a.) Incidence male aged 0 to 85 years old

**Asia**

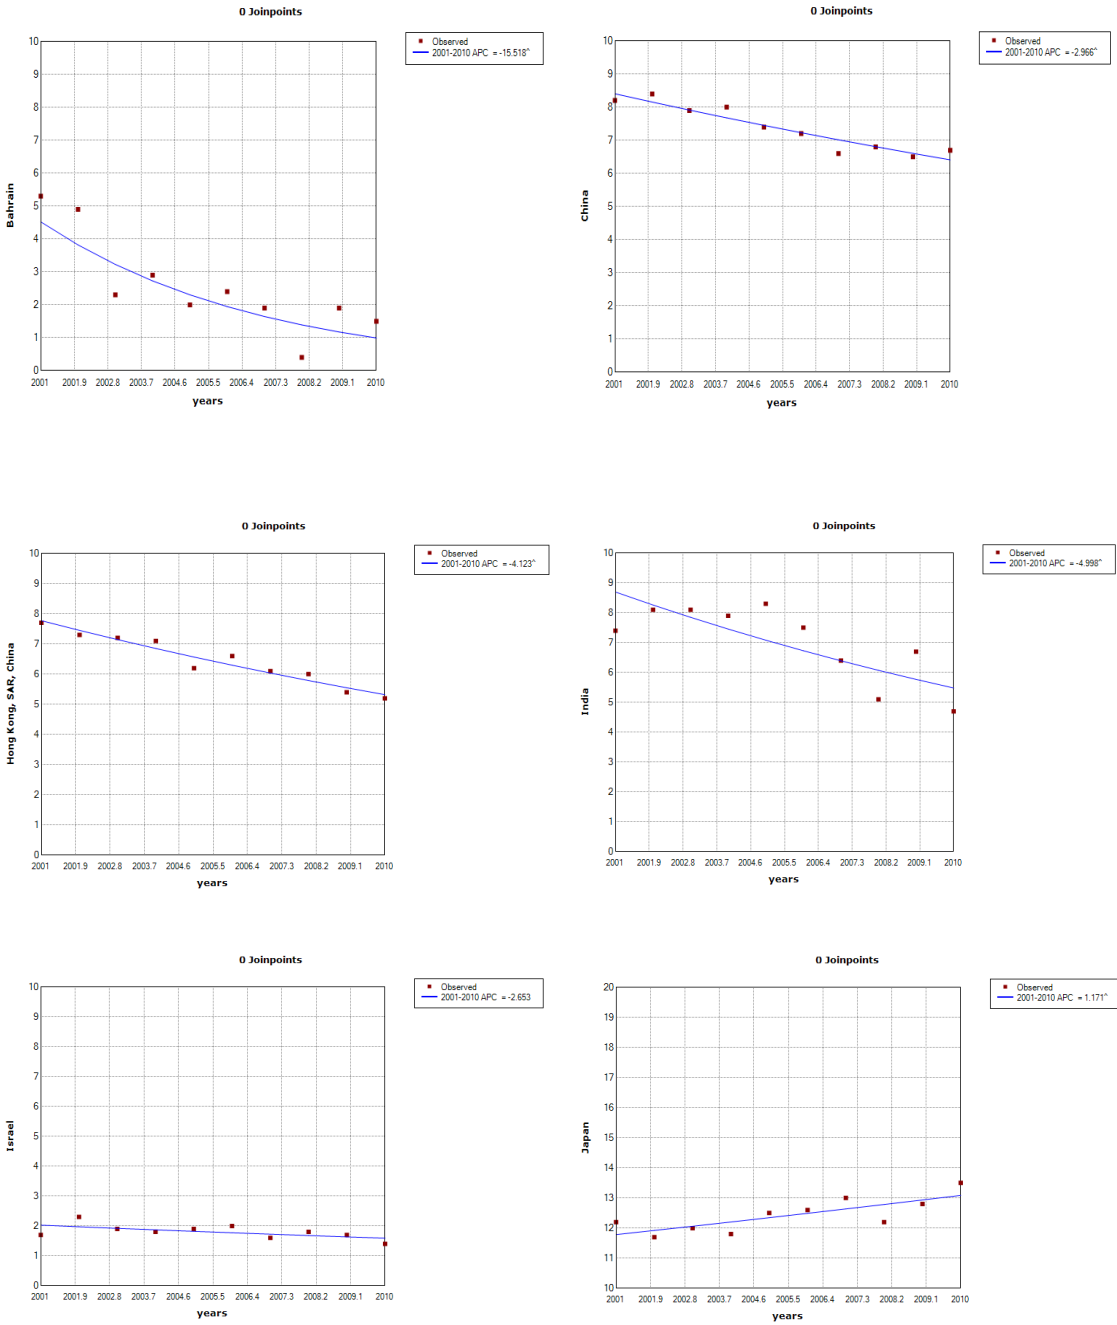

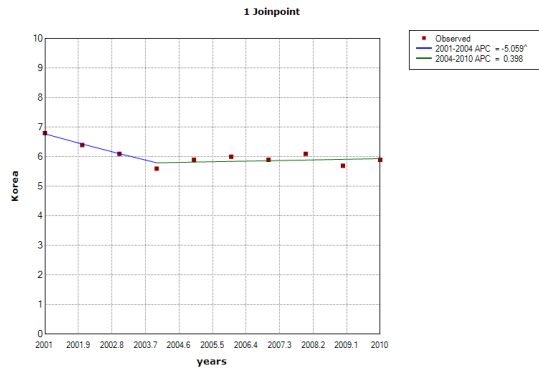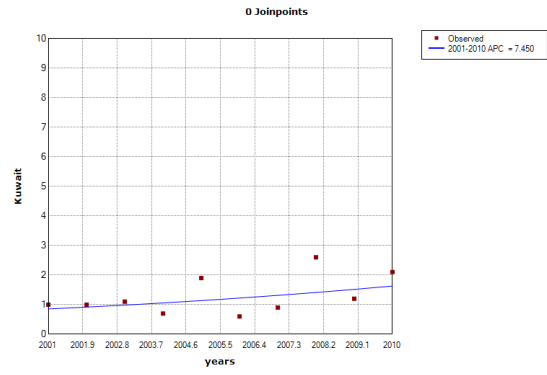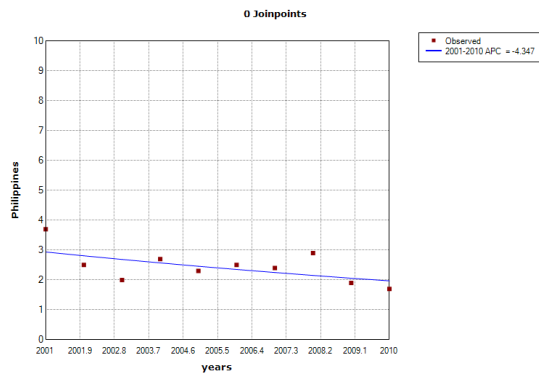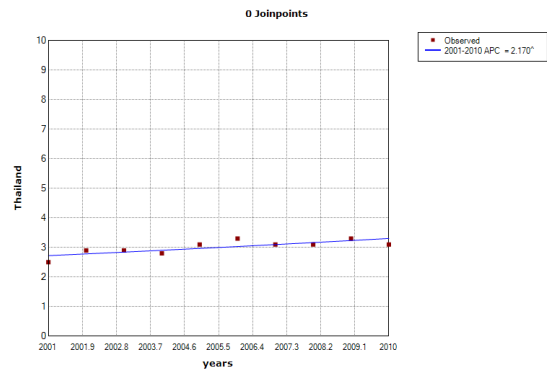

## Oceania

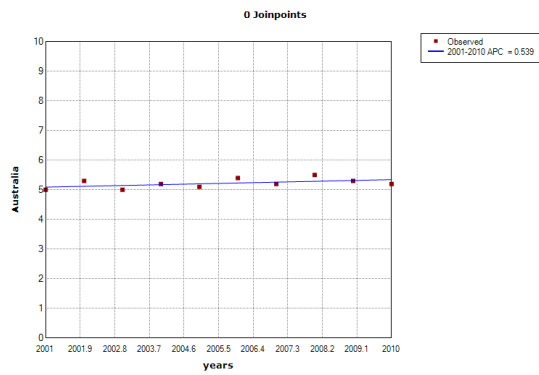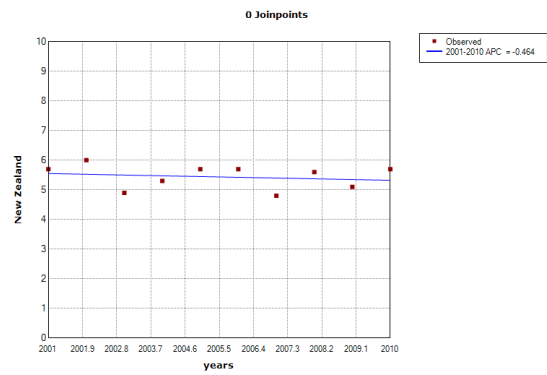



## Northern America

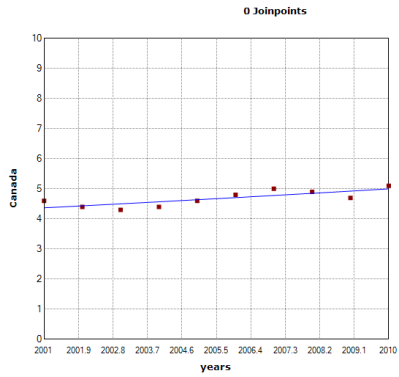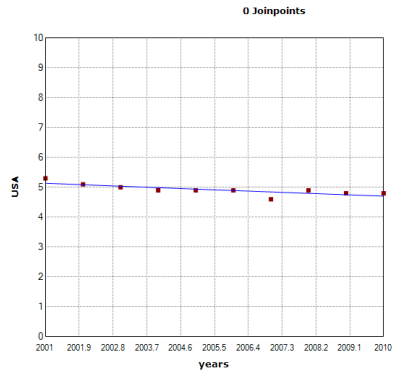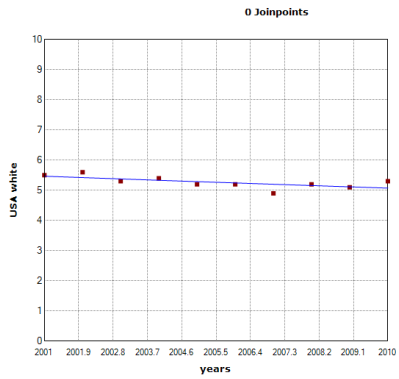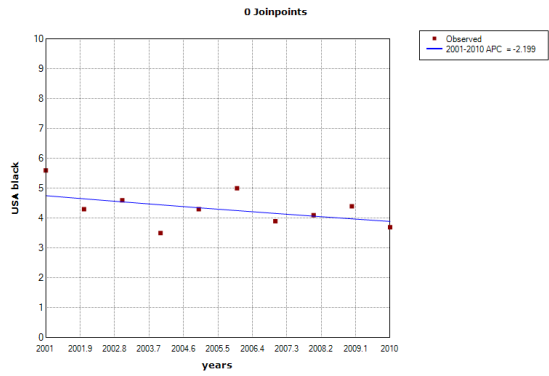

## Southern America

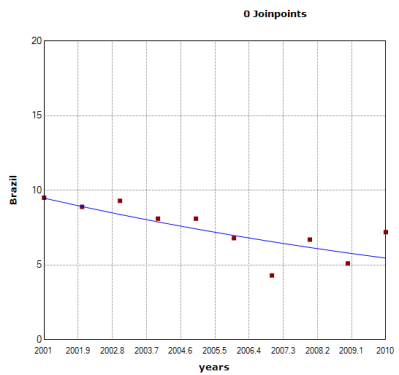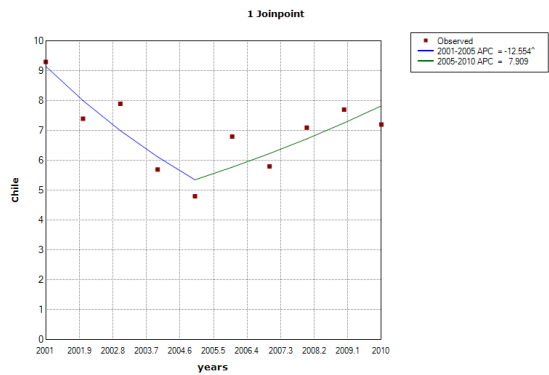

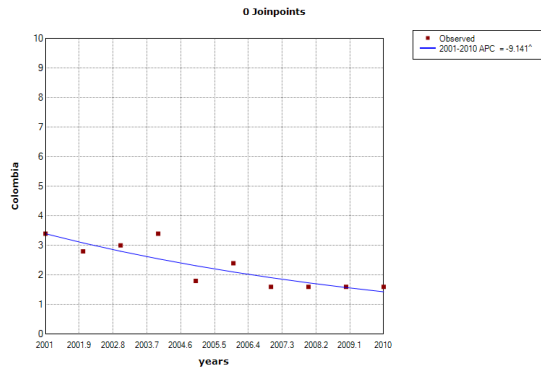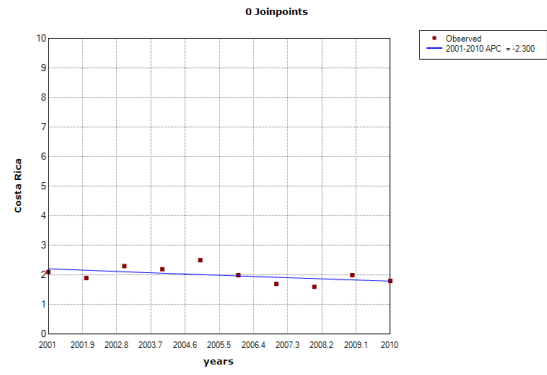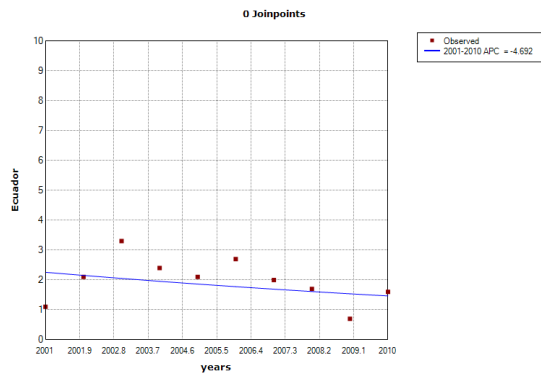

## Northern Europe

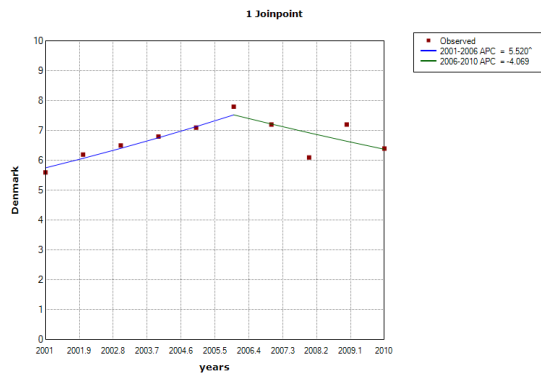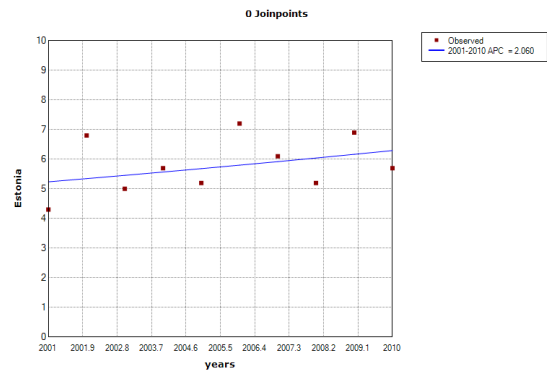

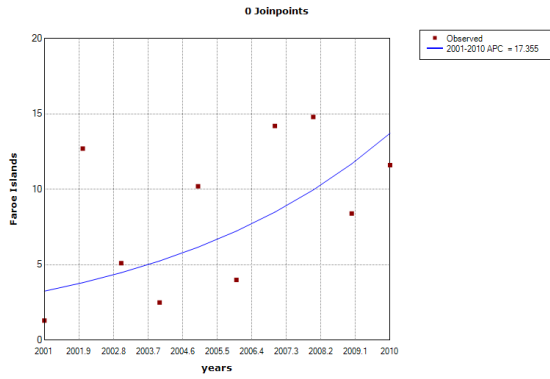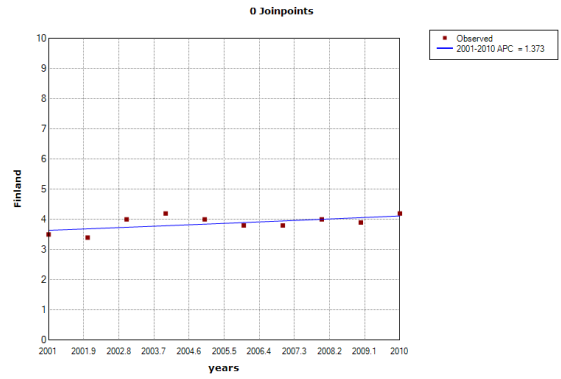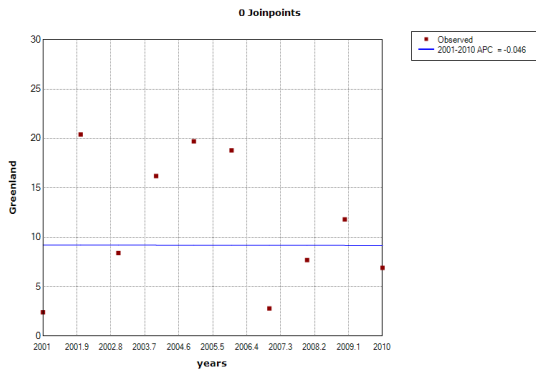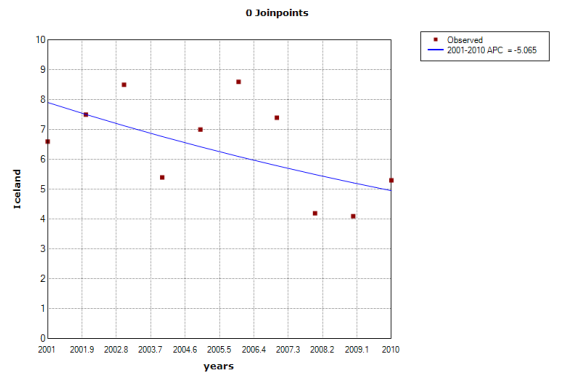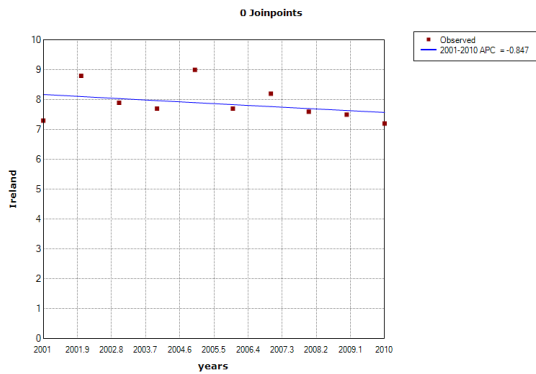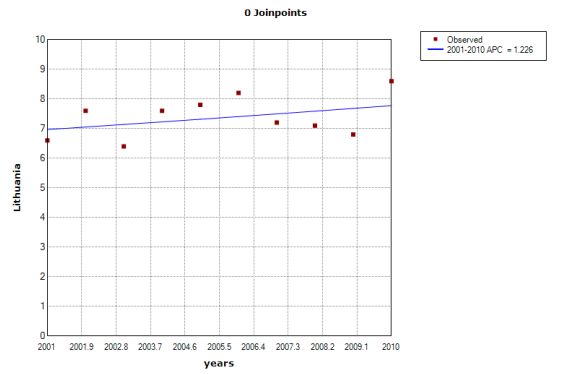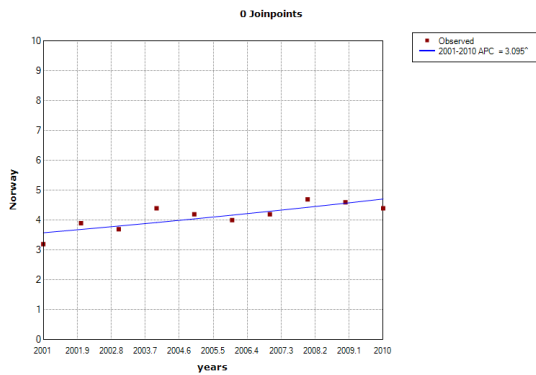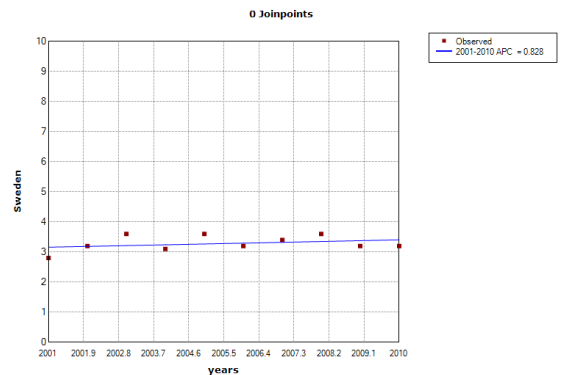

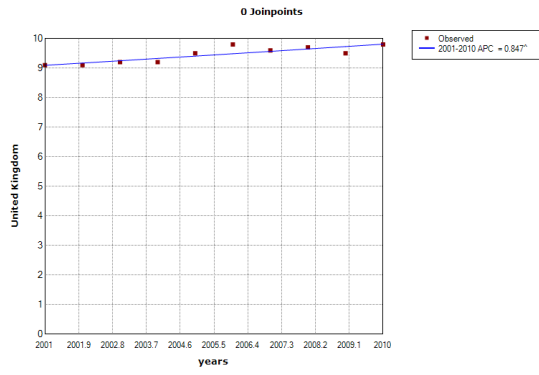

## Western Europe

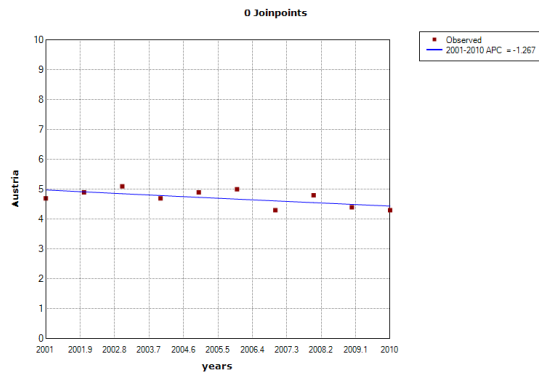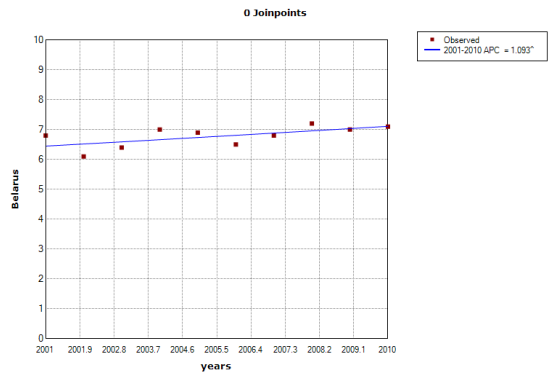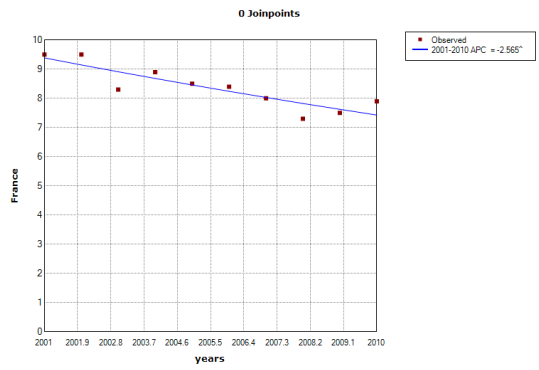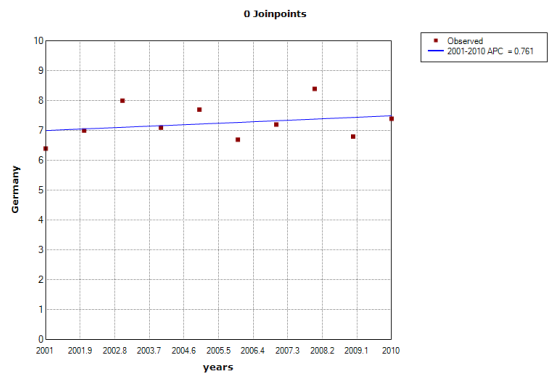

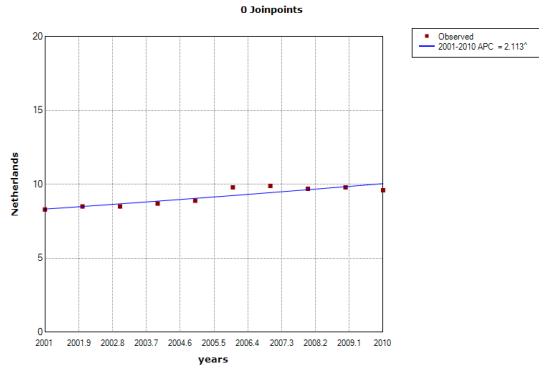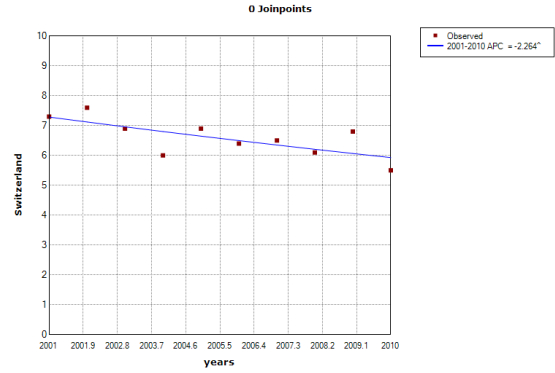

## Southern Europe

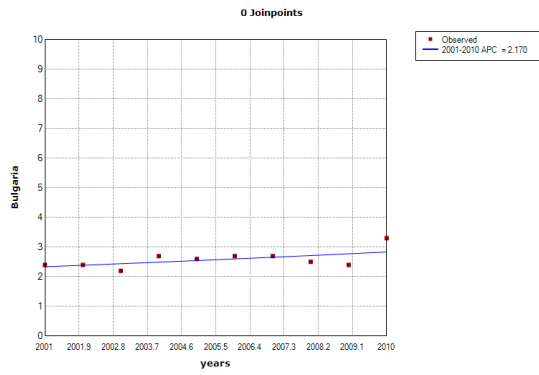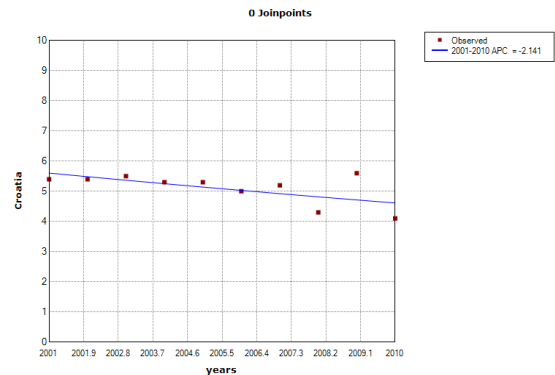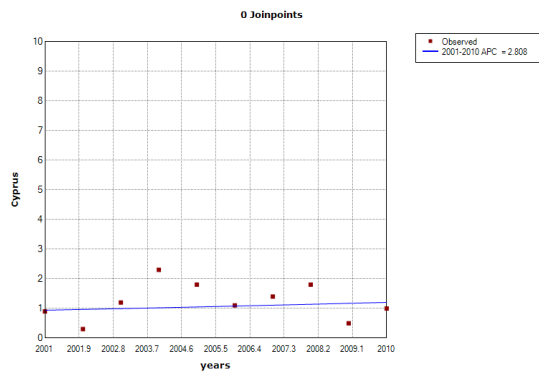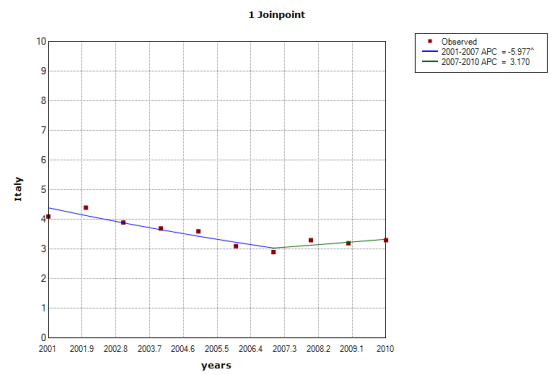

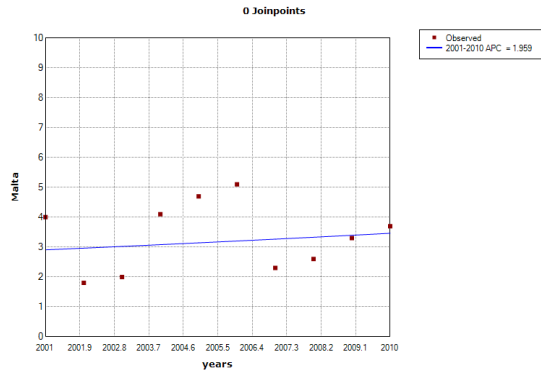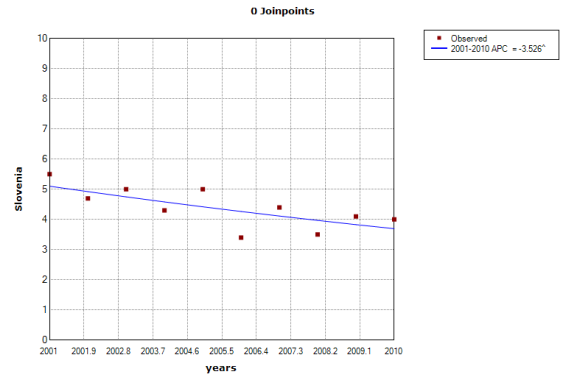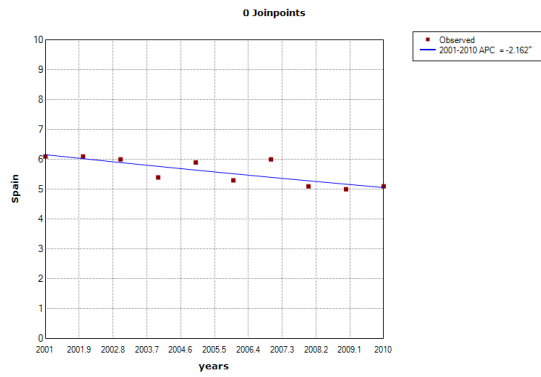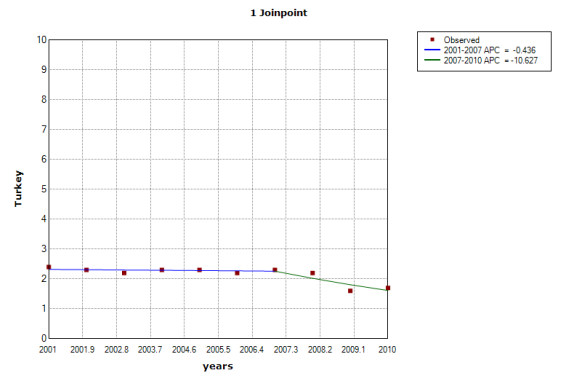

## Eastern Europe

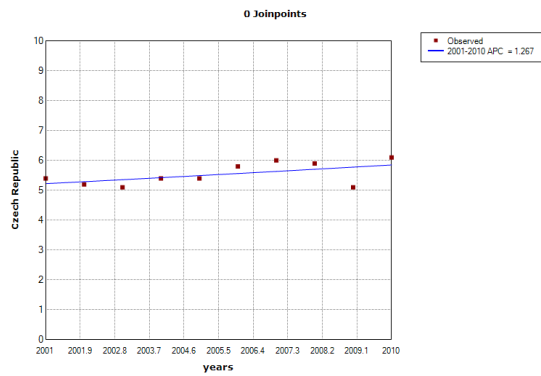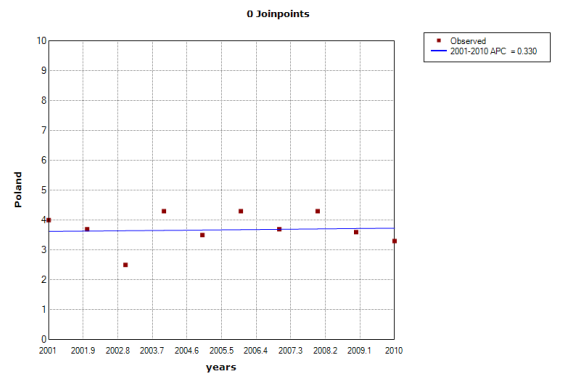

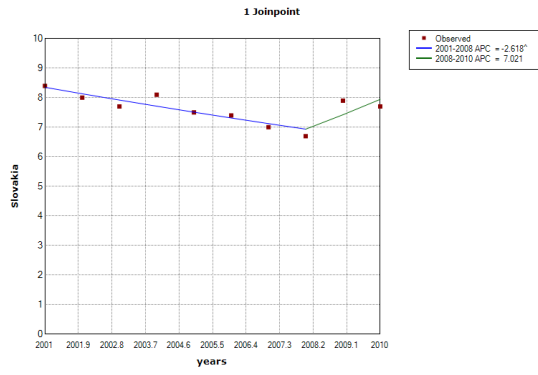

## Africa

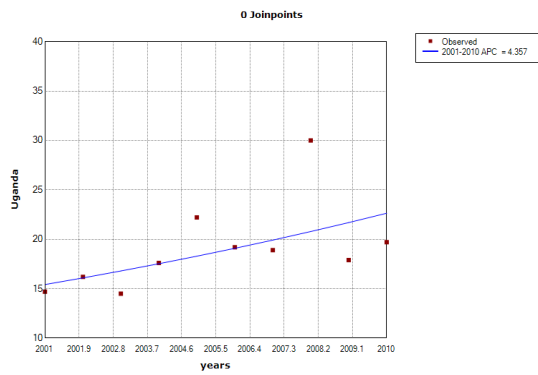

b.) Incidence female aged 0 to 85 years old

## Asia

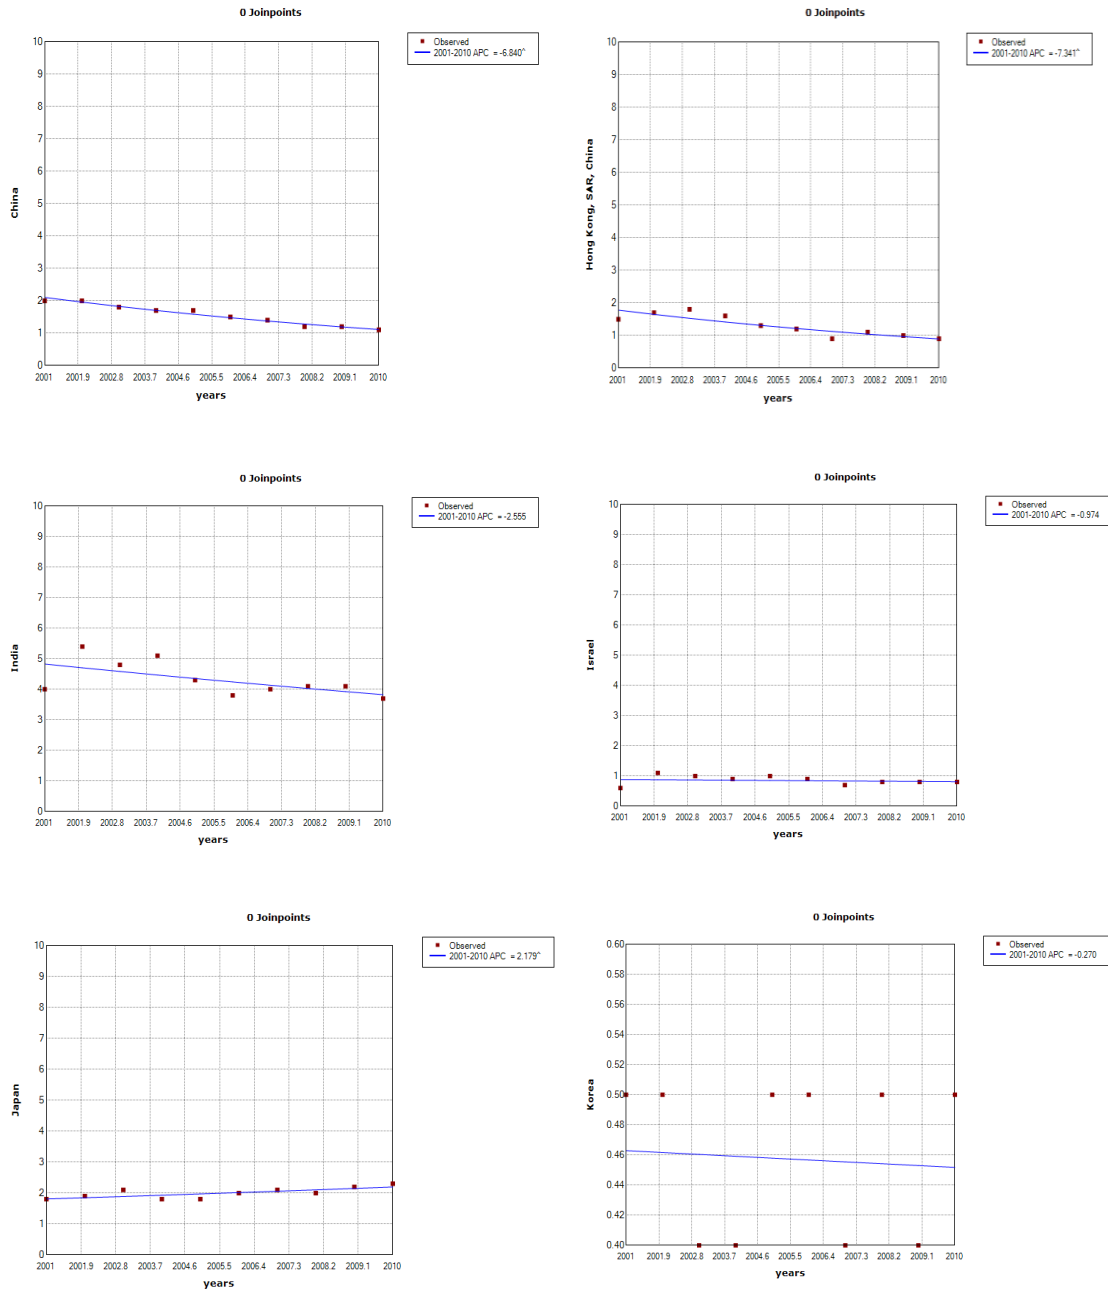



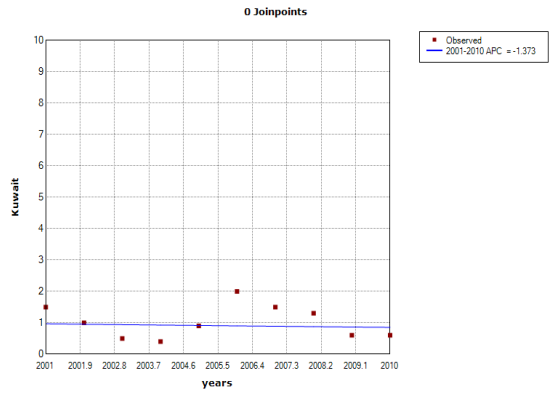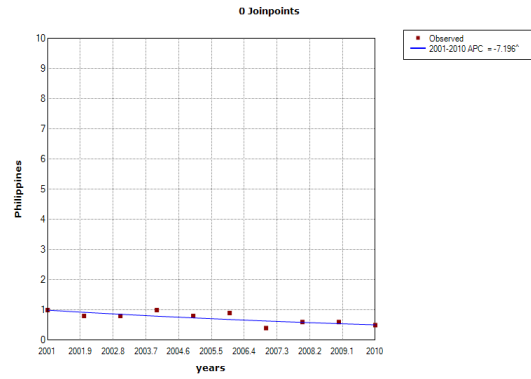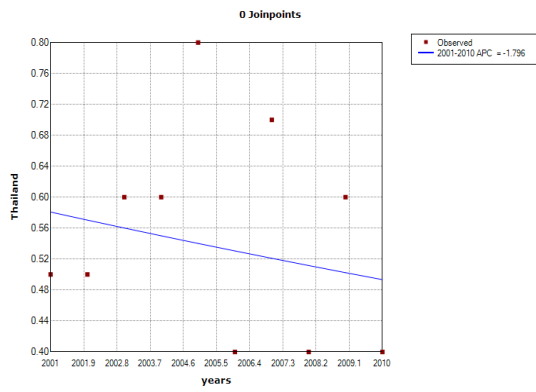

## Oceania

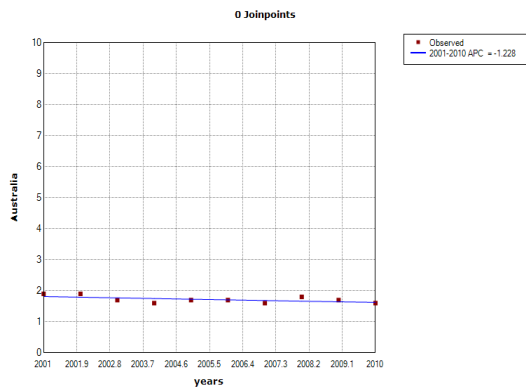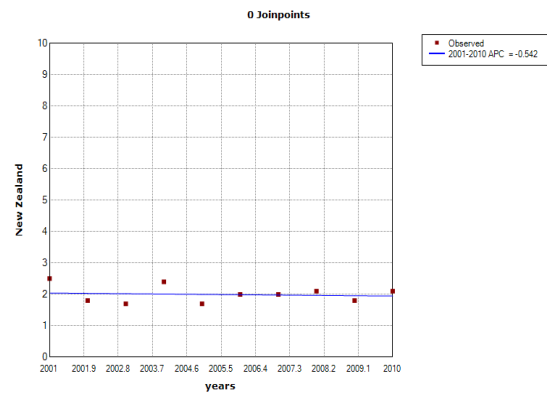

## Northern America

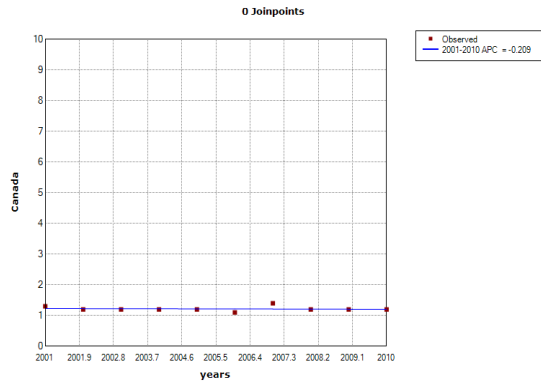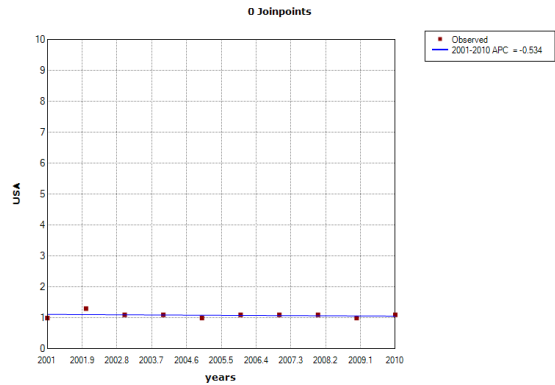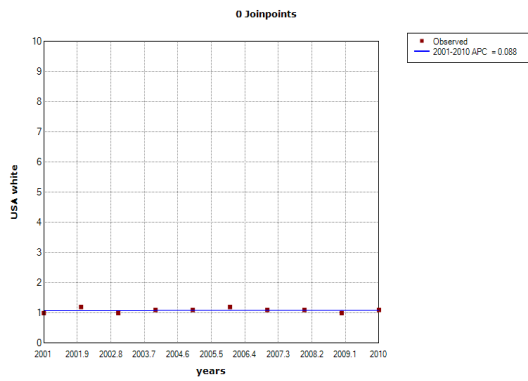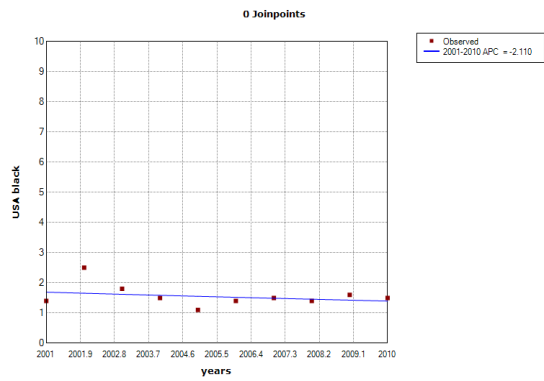

## Southern America

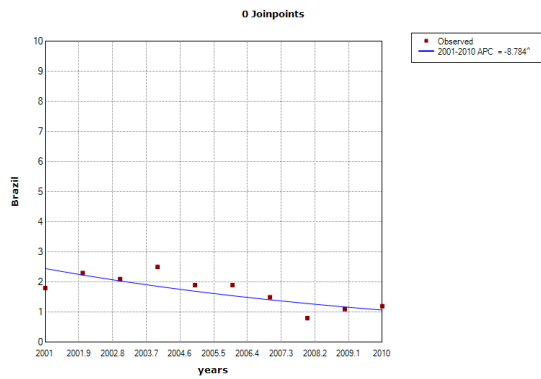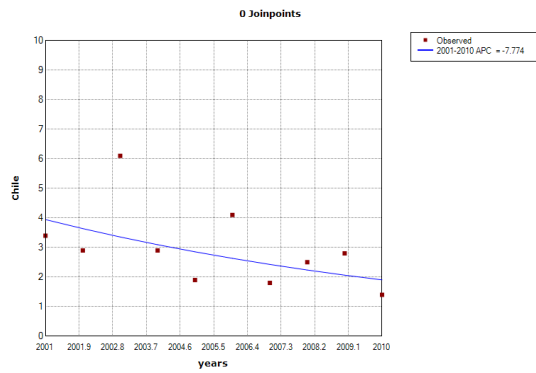

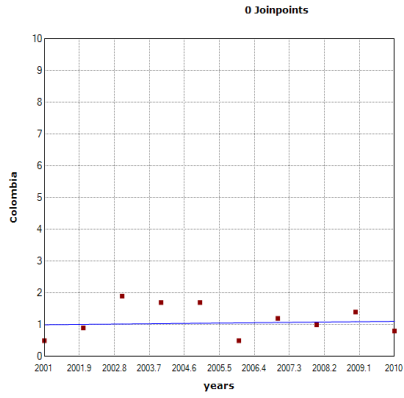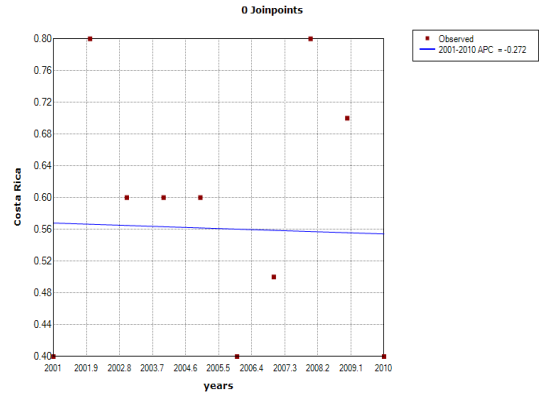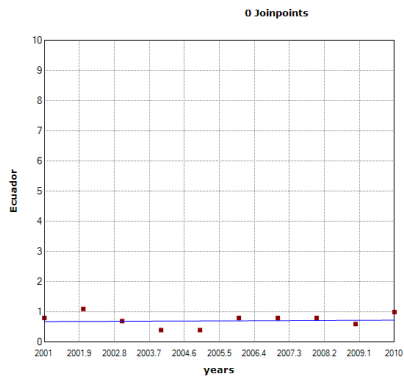

## Northern Europe

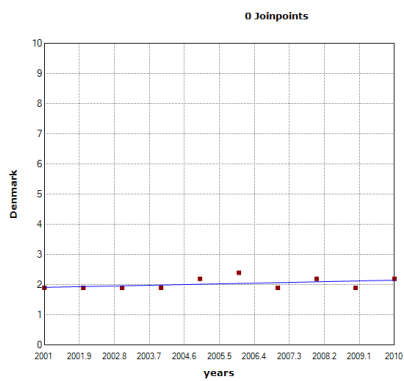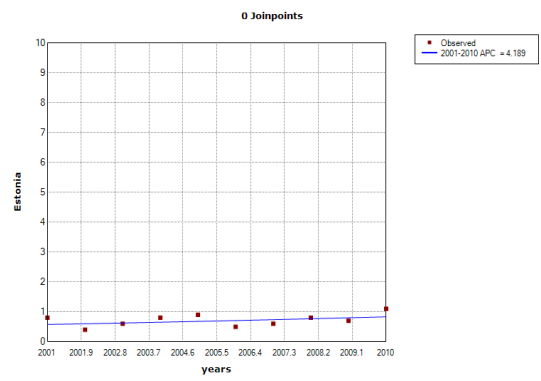

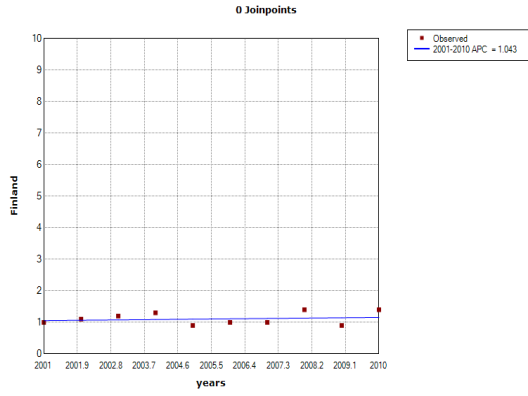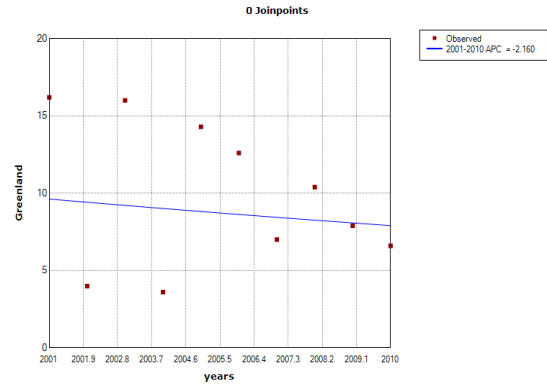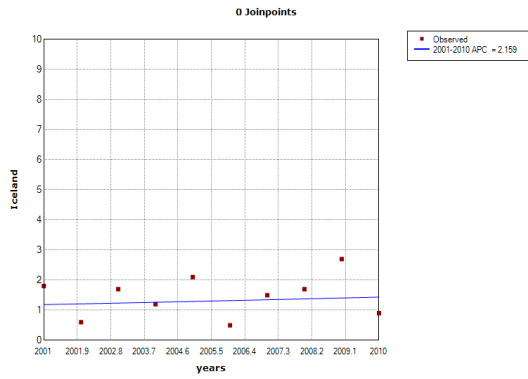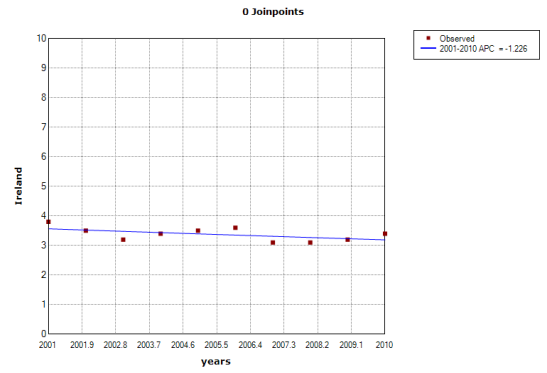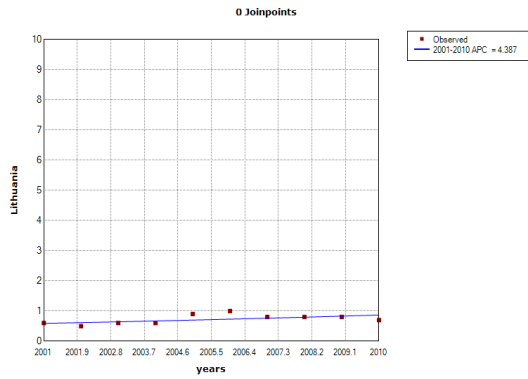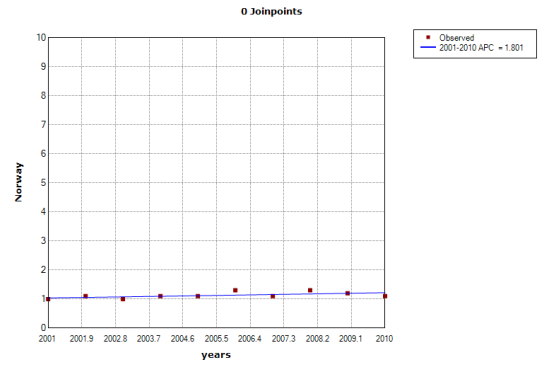

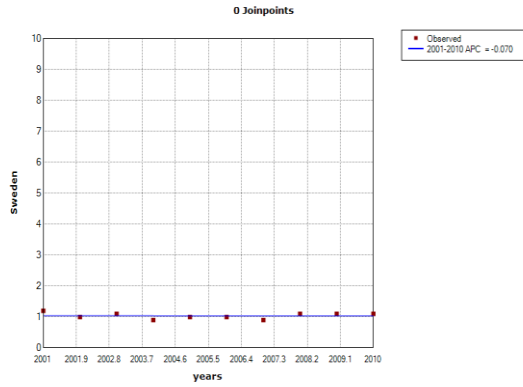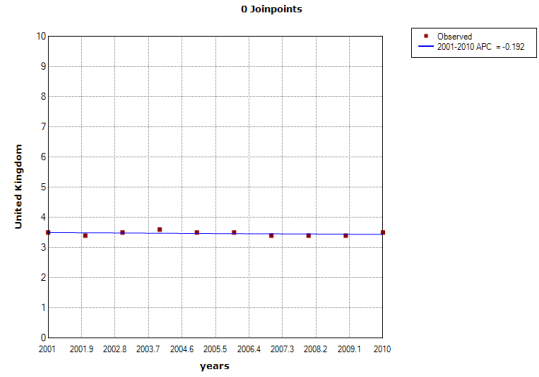

## Western Europe

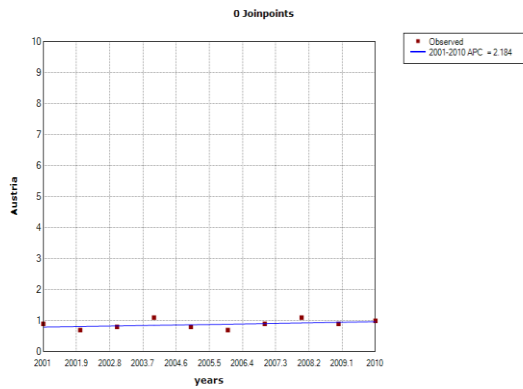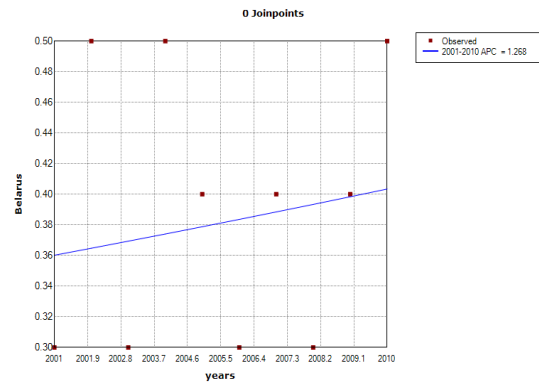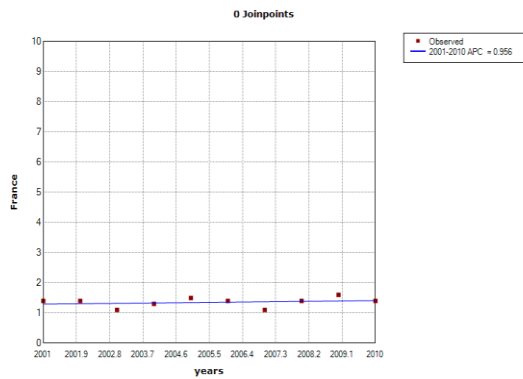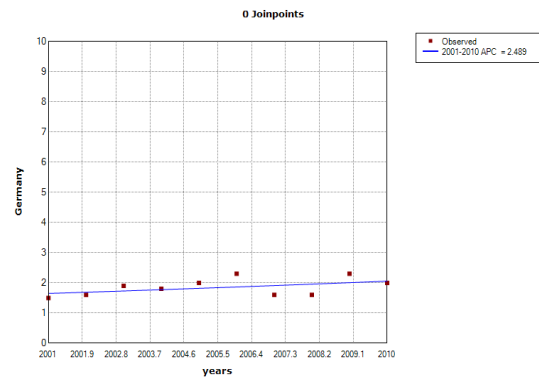

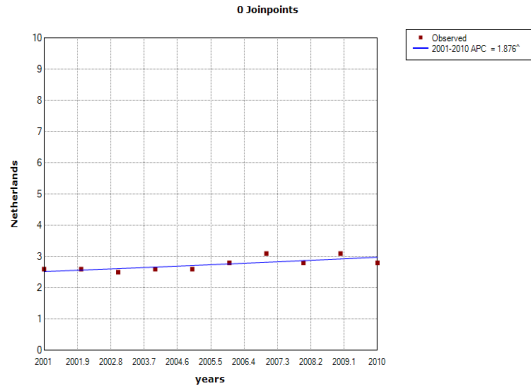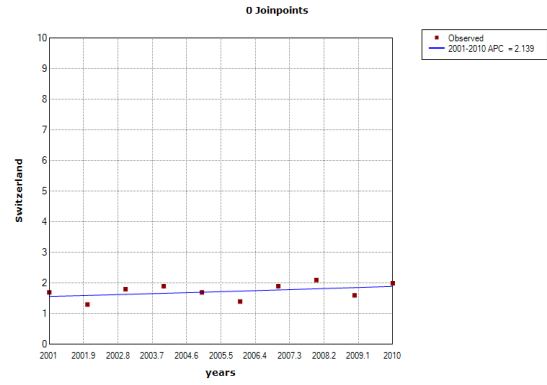

## Southern Europe

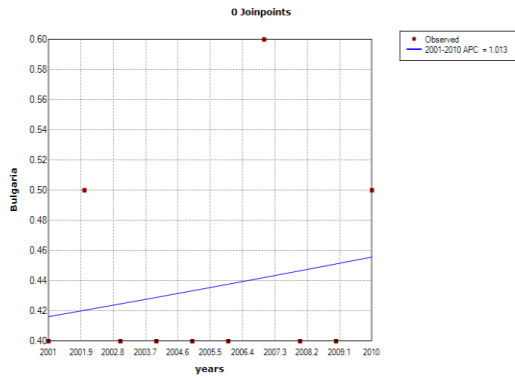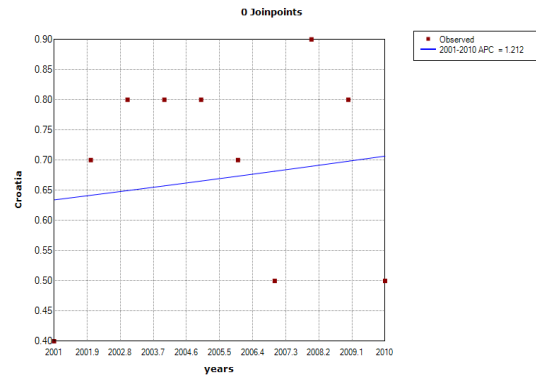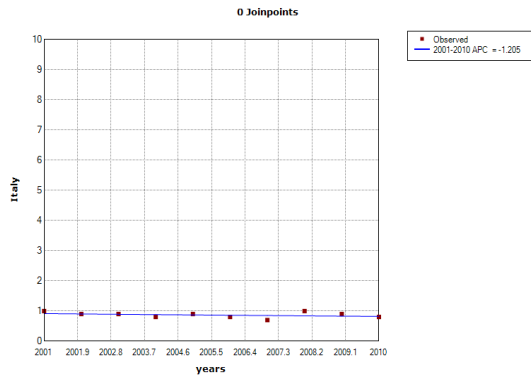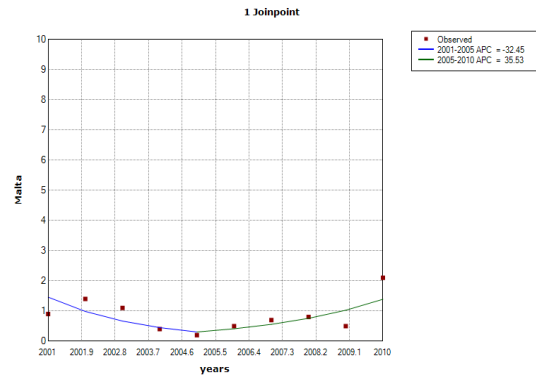

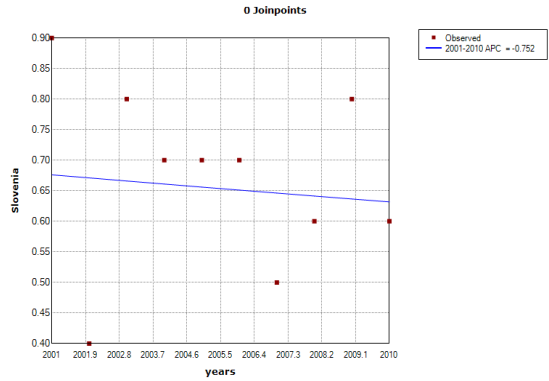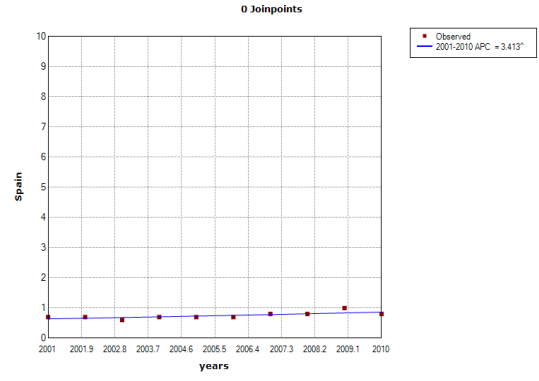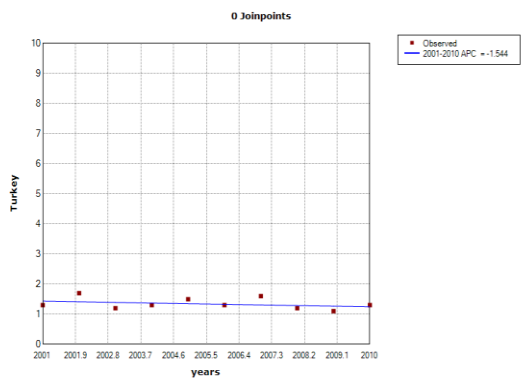

## Eastern Europe

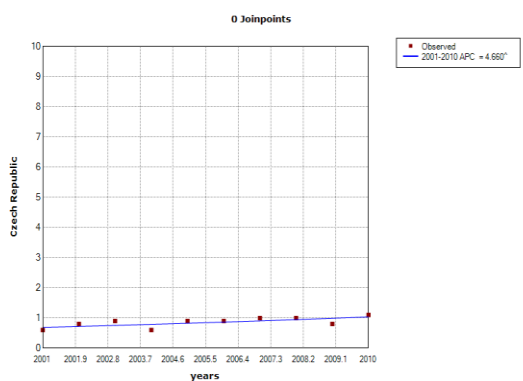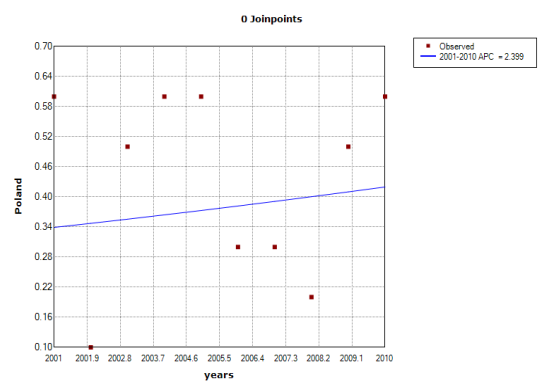

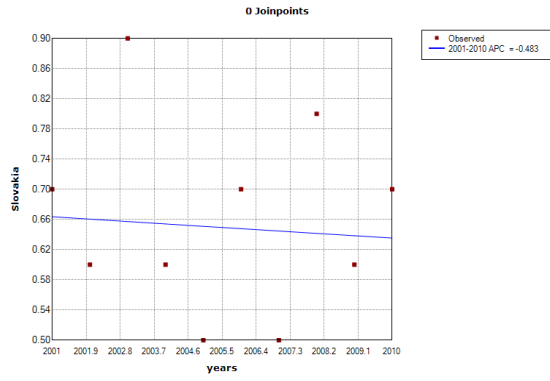

## Africa

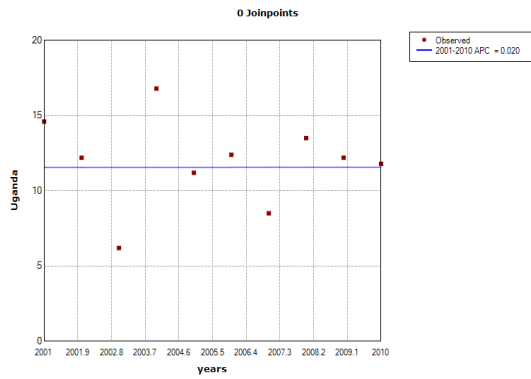



c.) Incidence male aged below 40 years old

## Asia

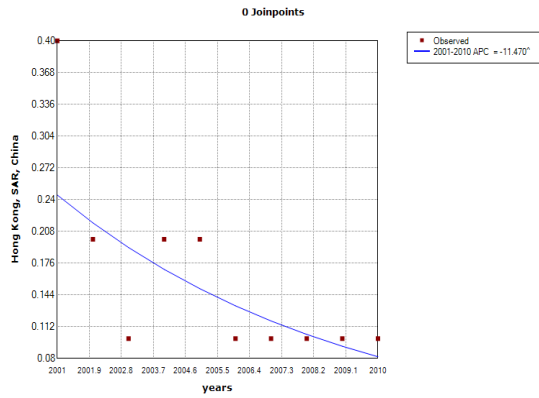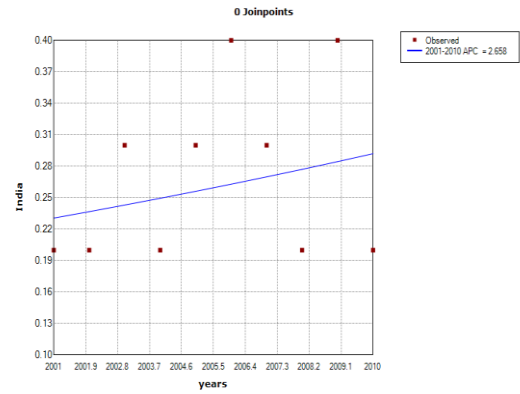

## Northern America

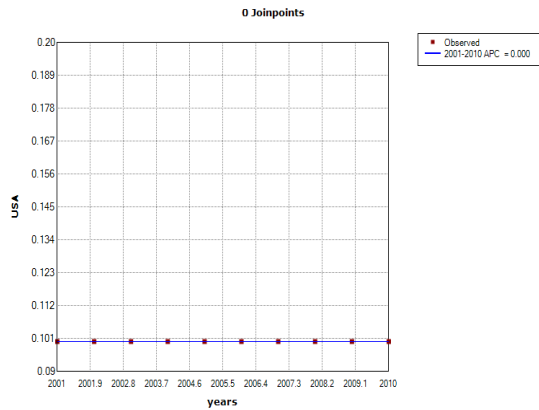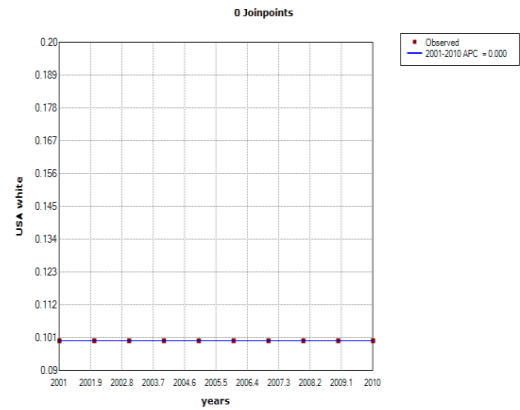

## Northern Europe

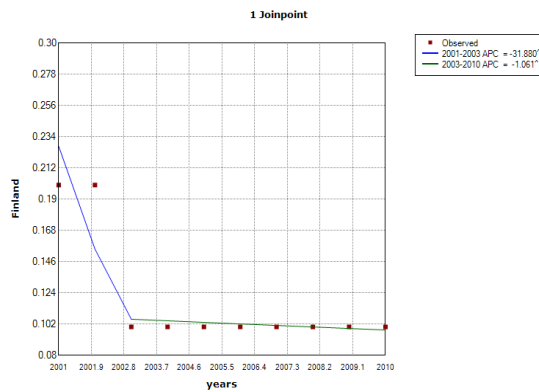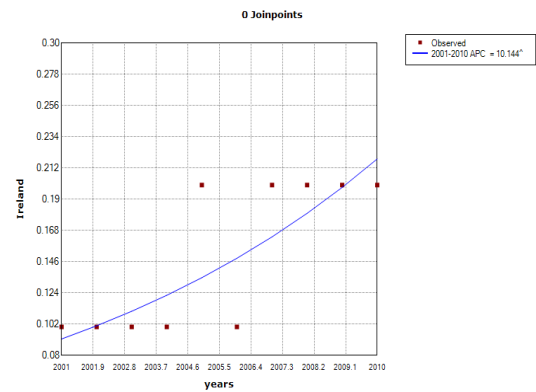

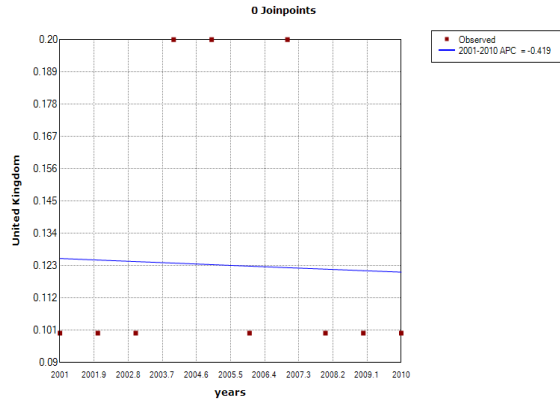

## Western Europe

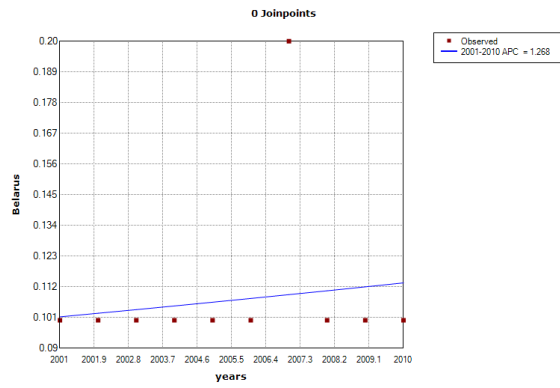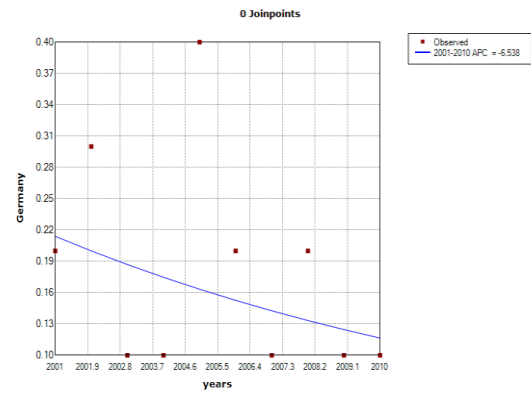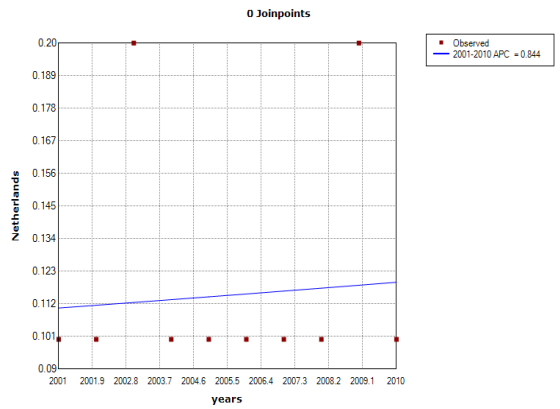

## Southern Europe

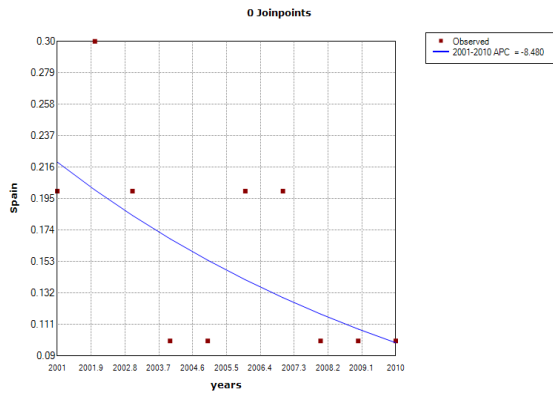

## Eastern Europe

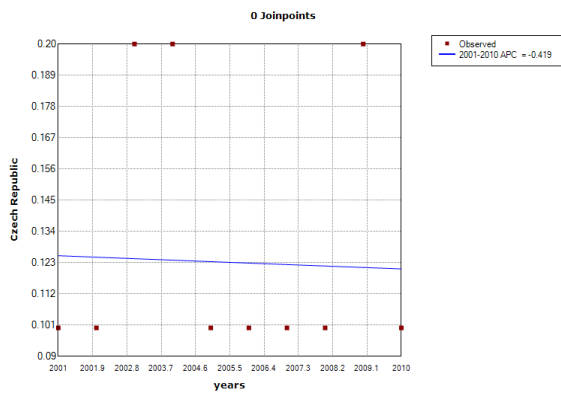

## Africa

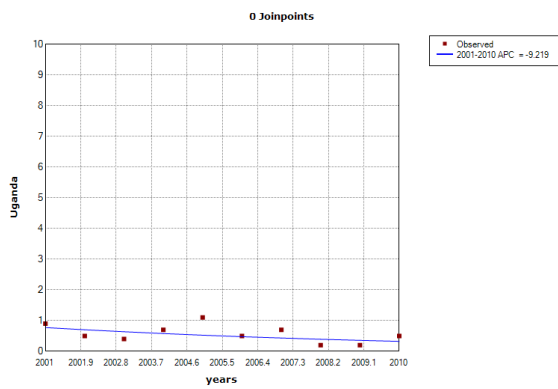



d.) Incidence female aged below 40 years old

## Asia

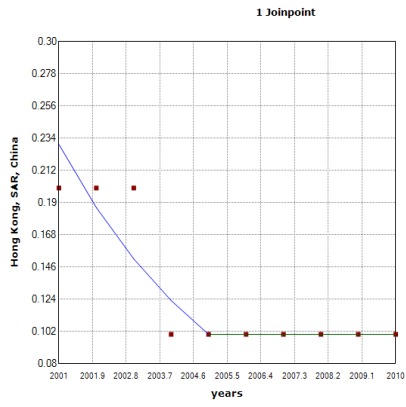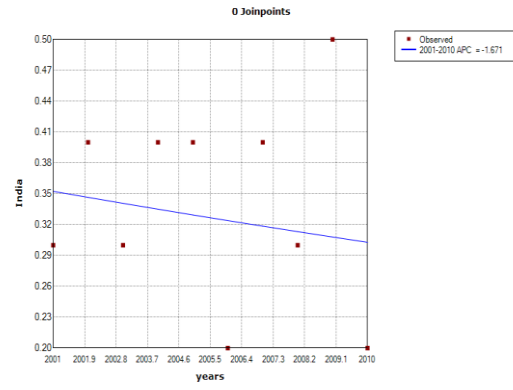

## Southern Europe

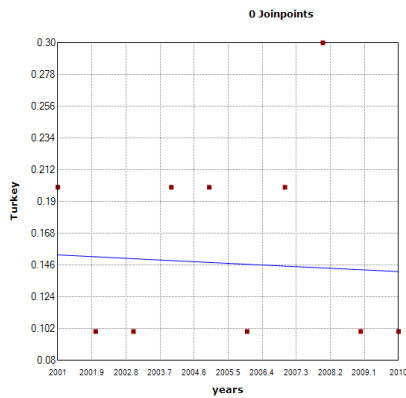

e.) Incidence male aged below 50 years old

## Asia

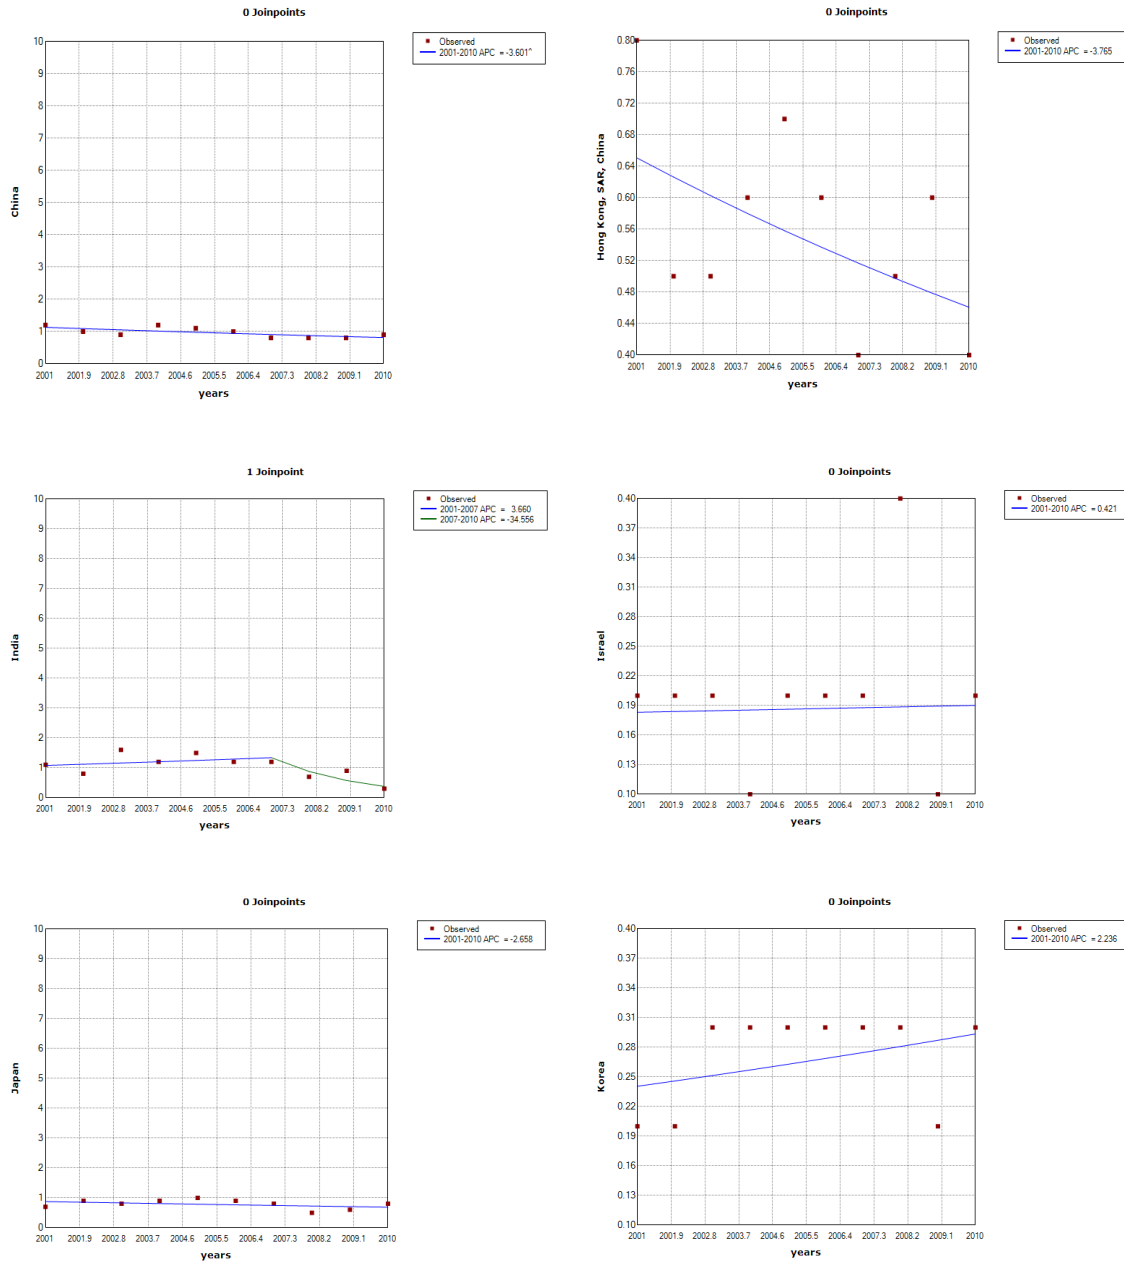

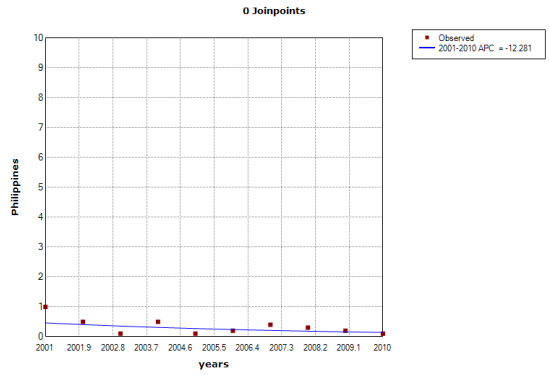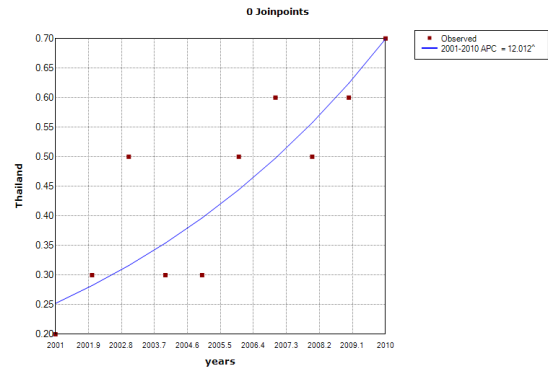

## Oceania

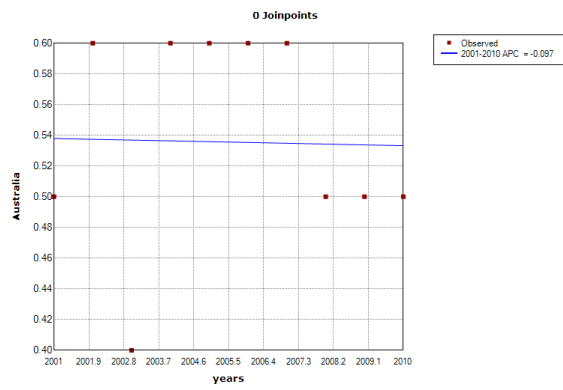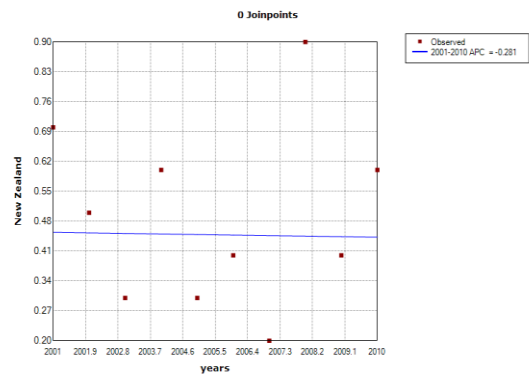

## Northern America

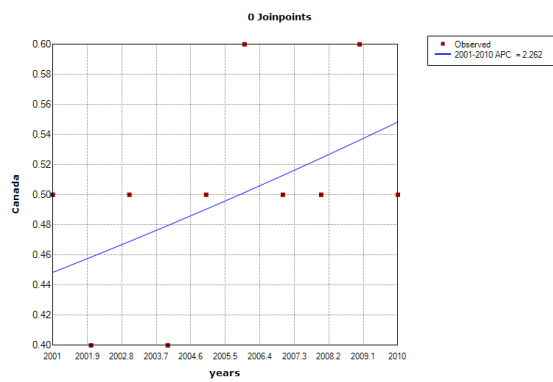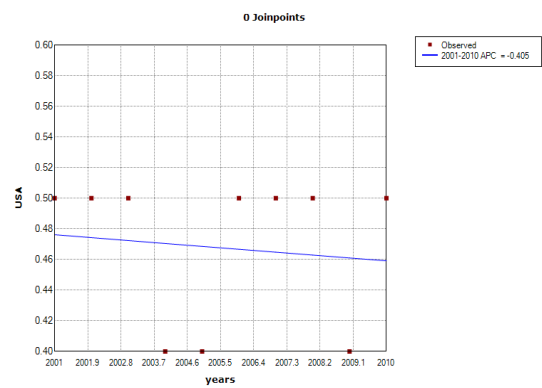

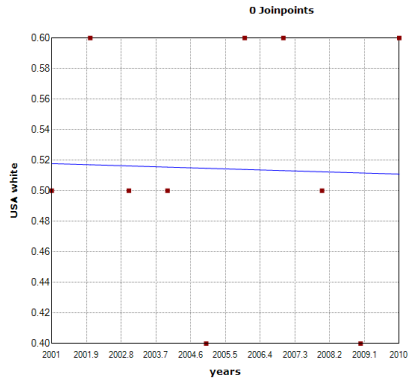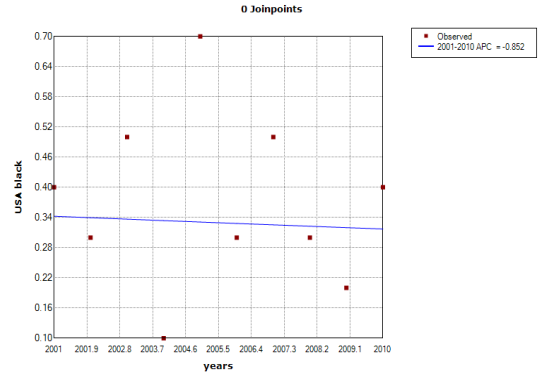

## Southern America

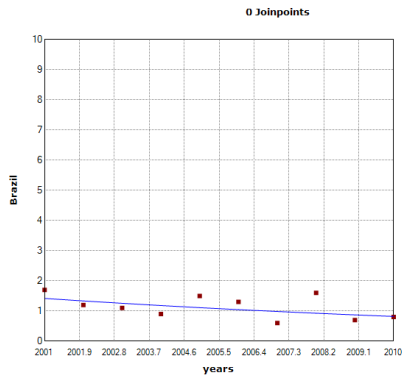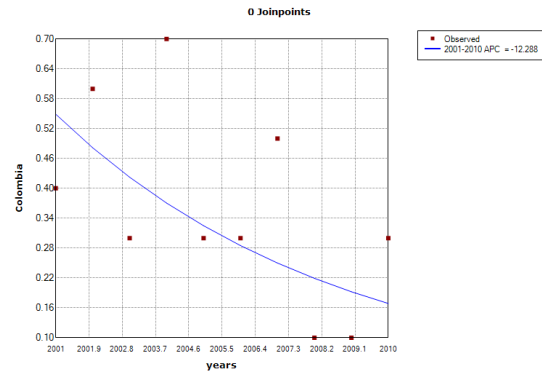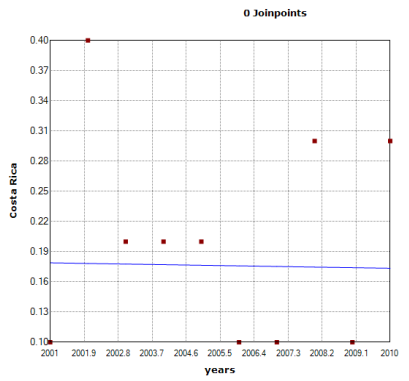



# Northern Europe

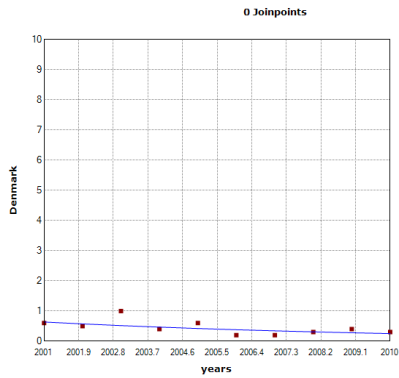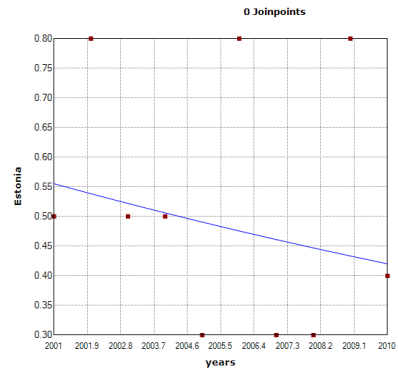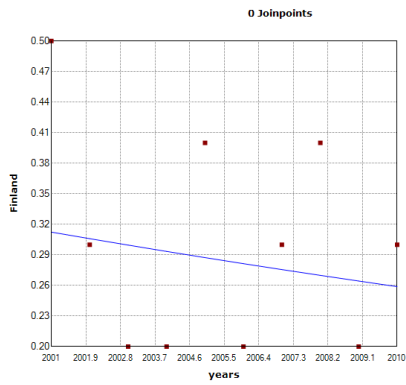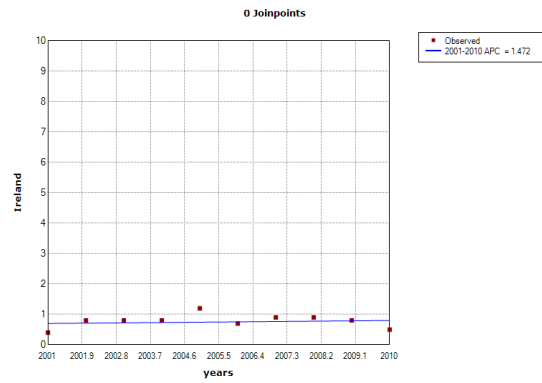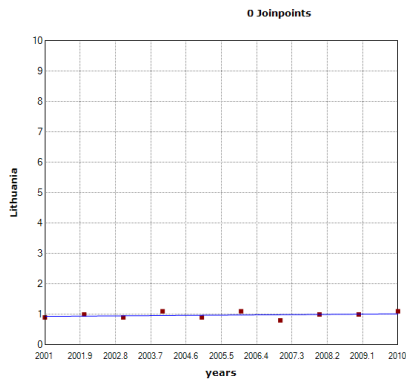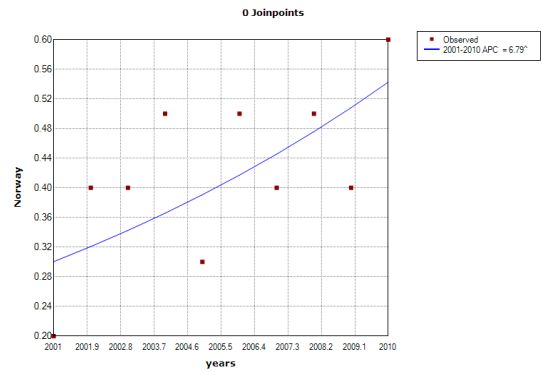

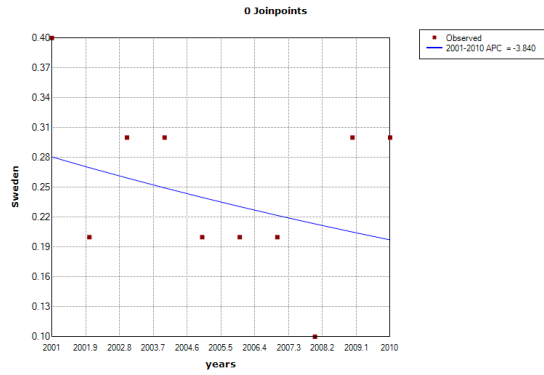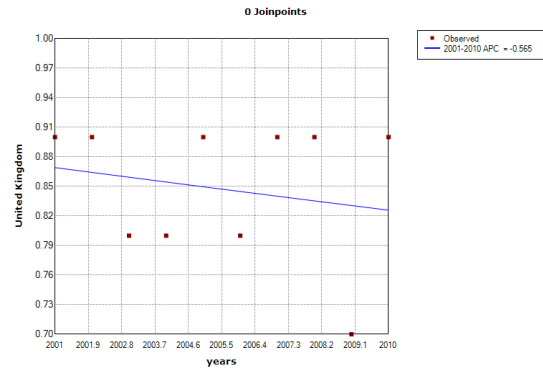

## Western Europe

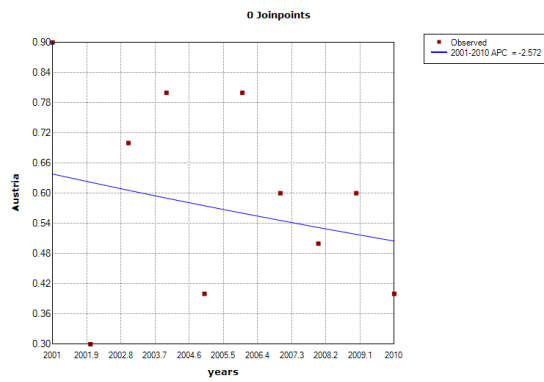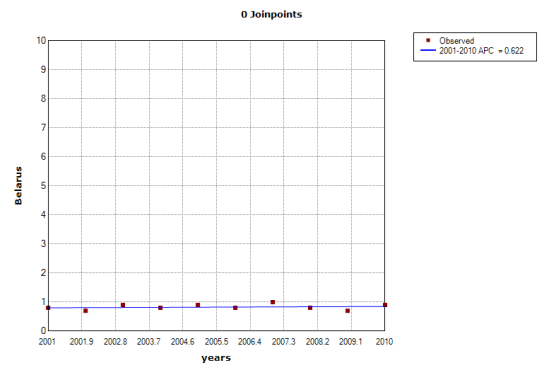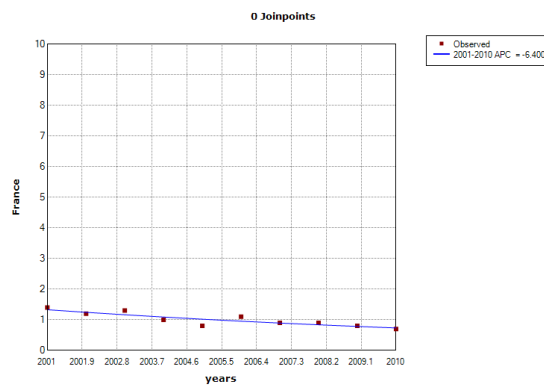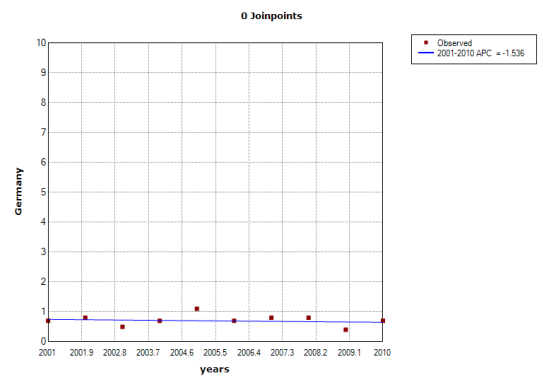

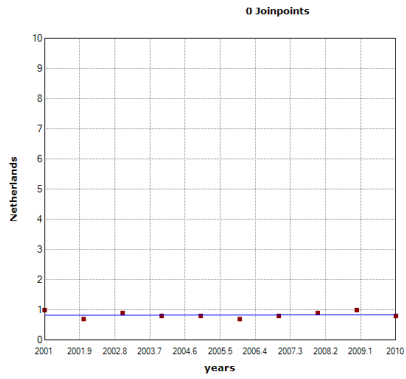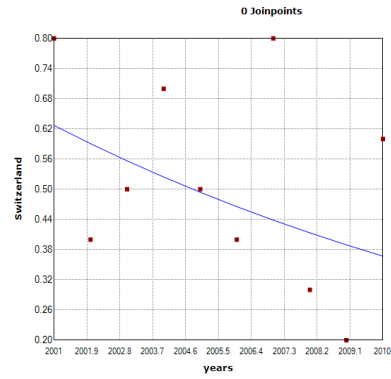

## Southern Europe

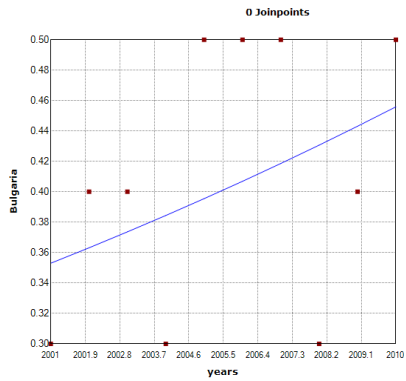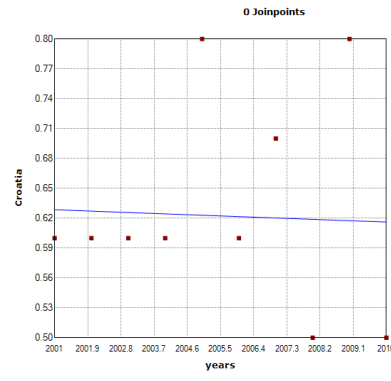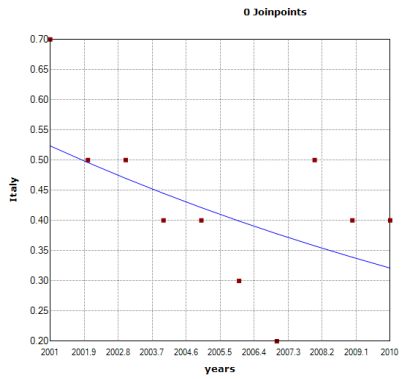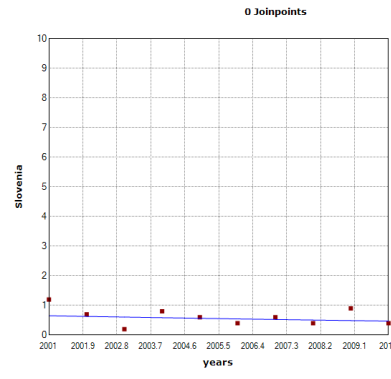

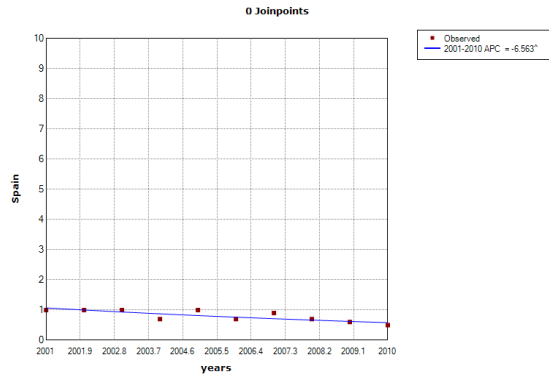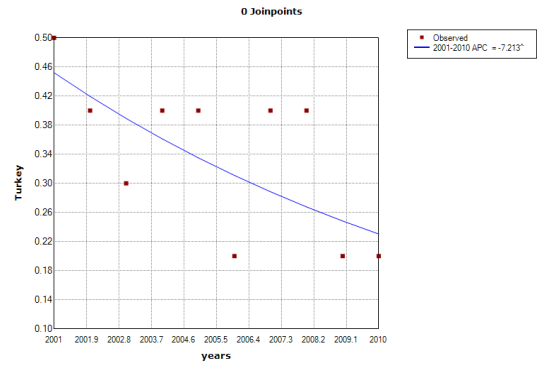

## Eastern Europe

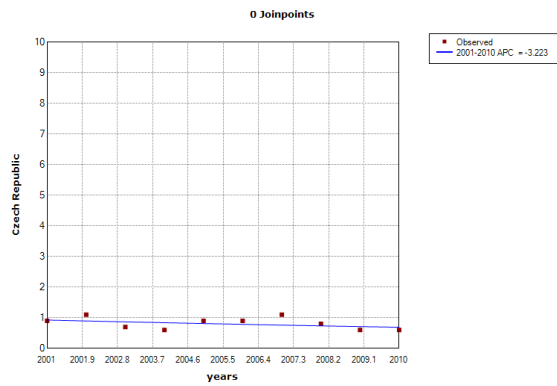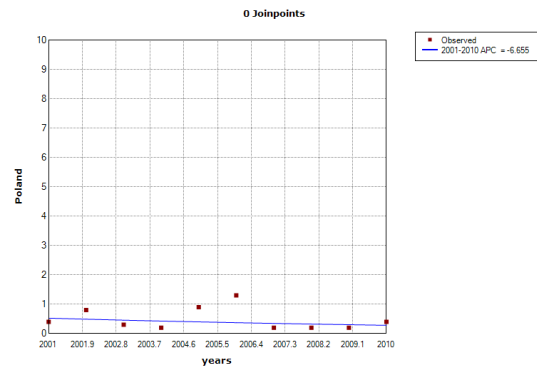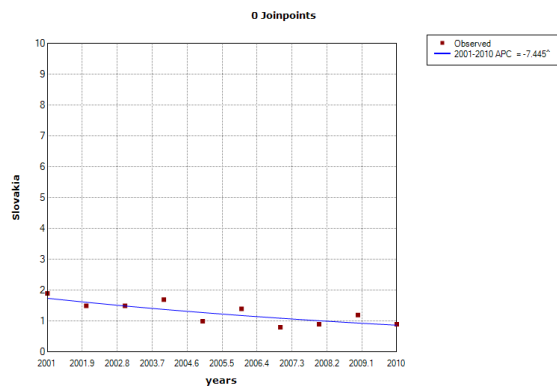

# Africa

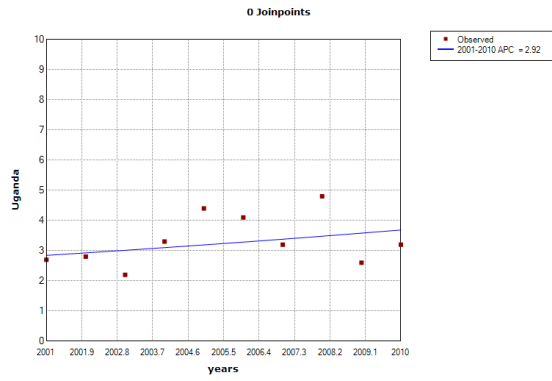

f.) Incidence female aged below 50 years old

## Asia

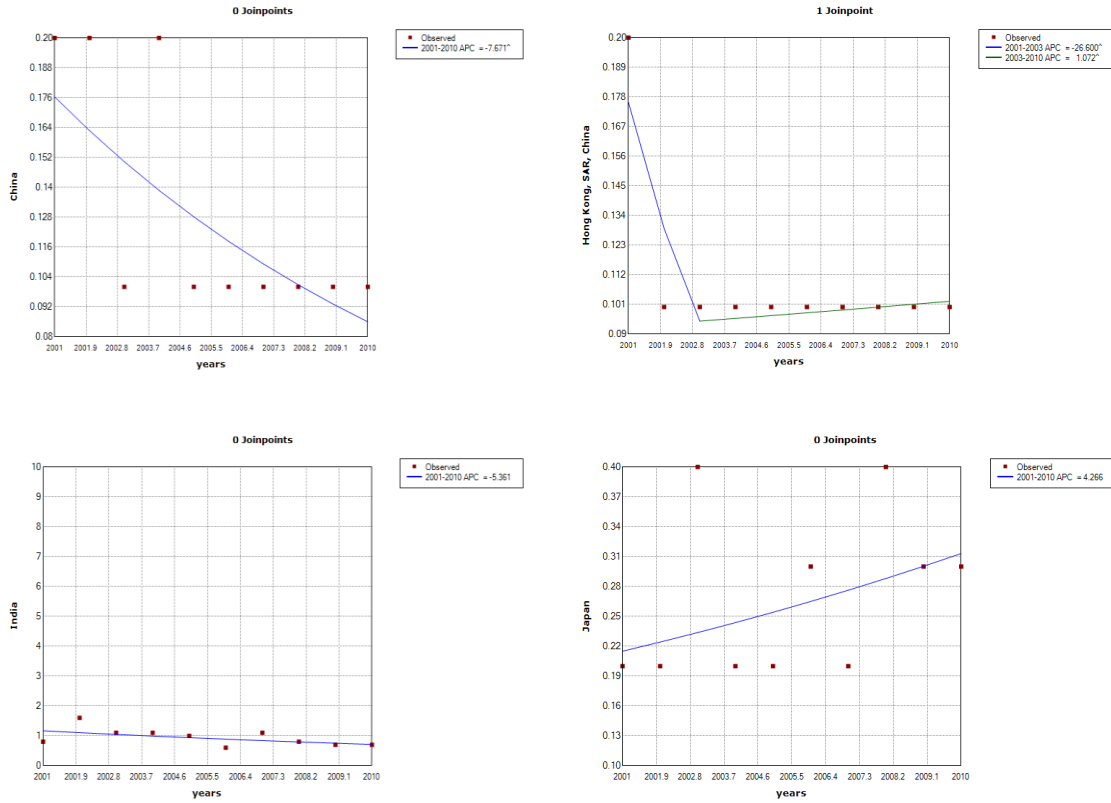

## Oceania

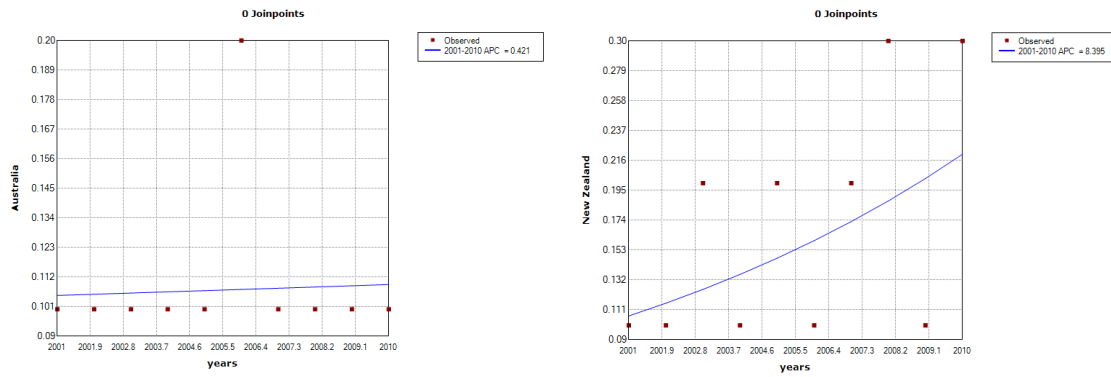

# Northern America

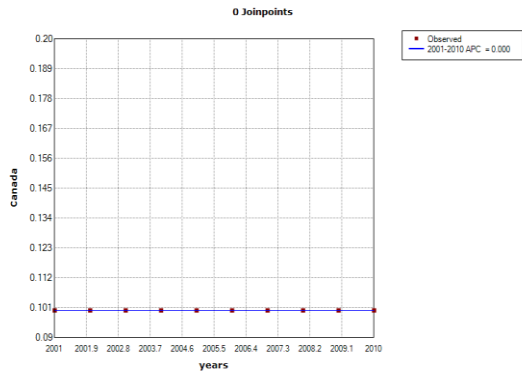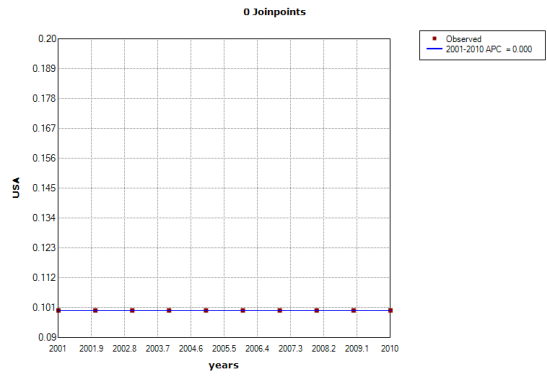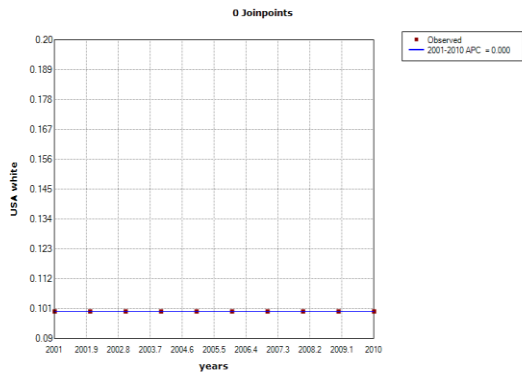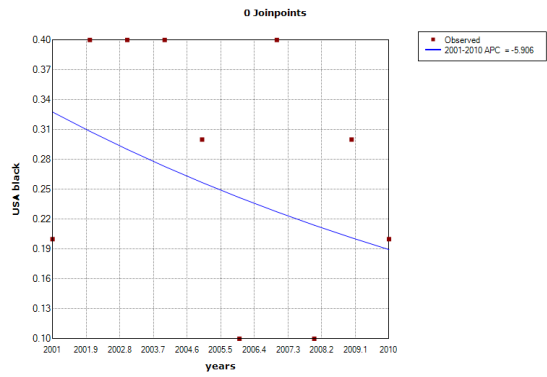

# Northern Europe

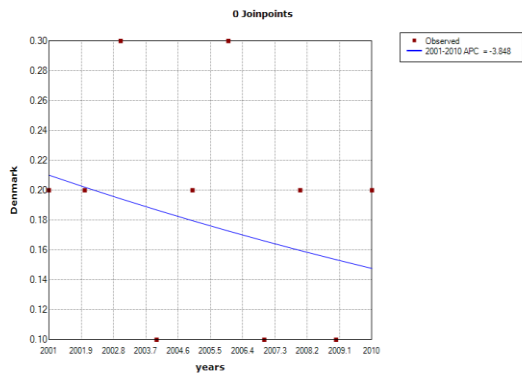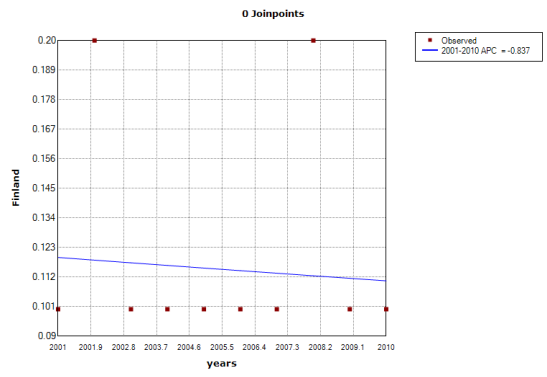

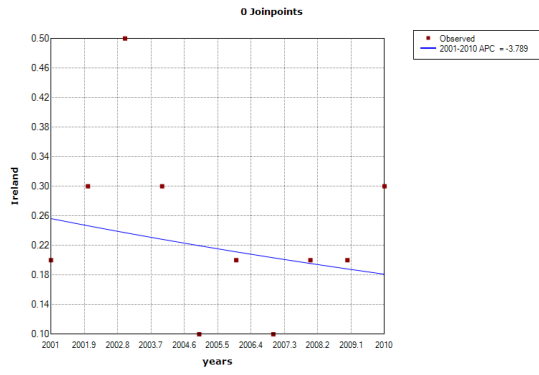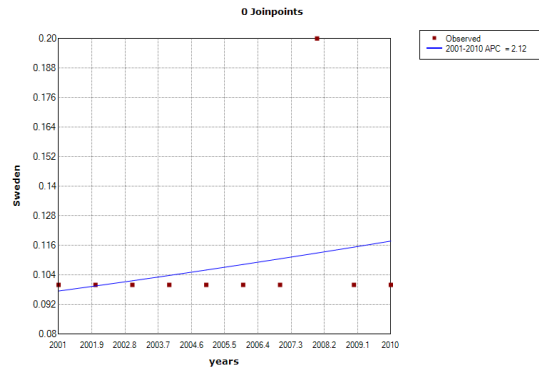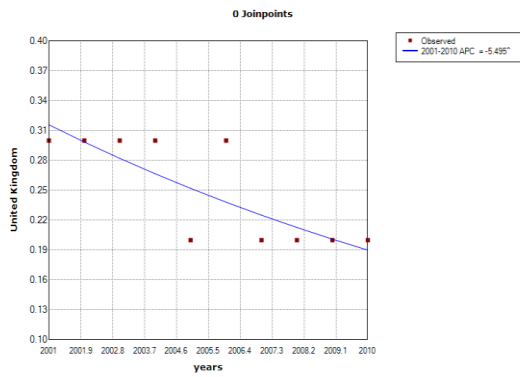

## Western Europe

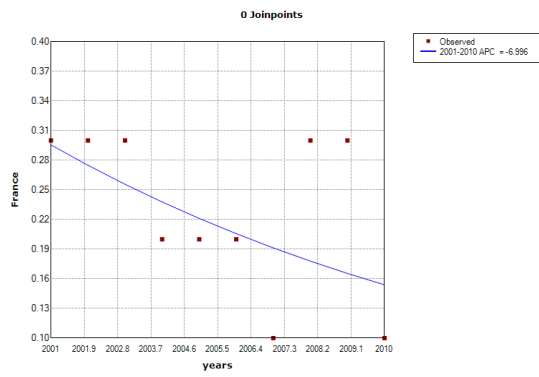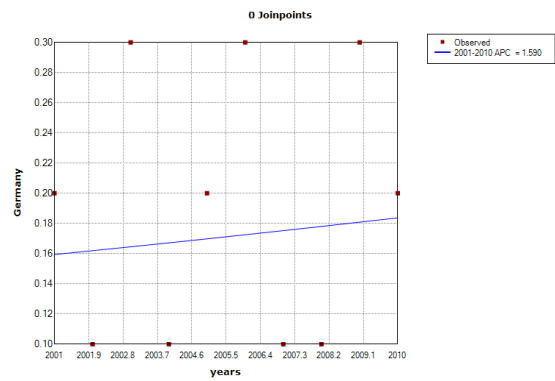



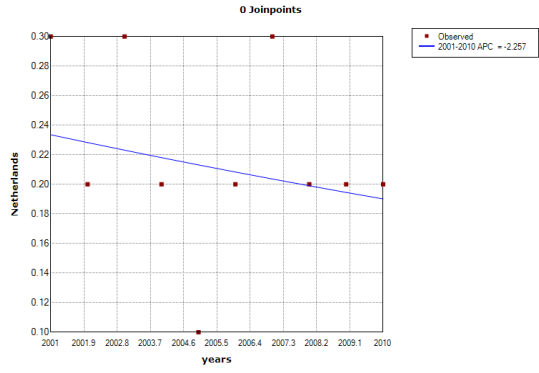

## Southern Europe

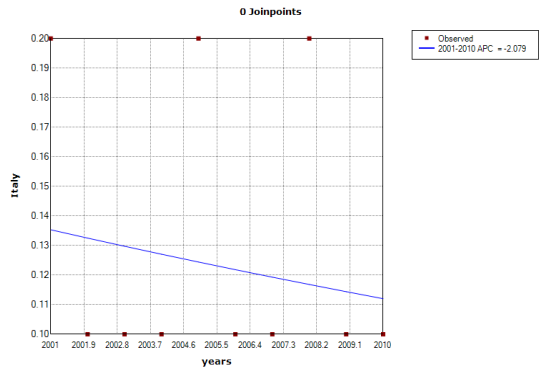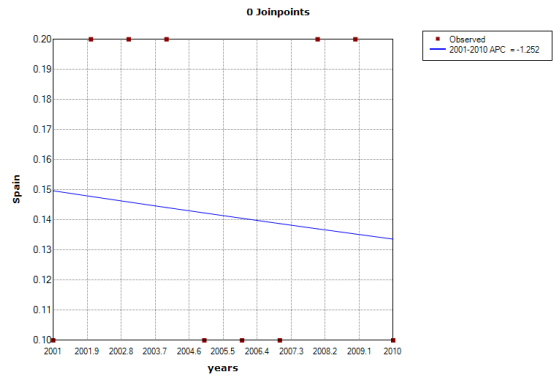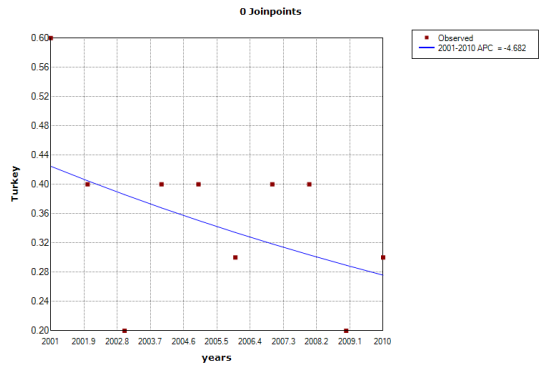

# Eastern Europe

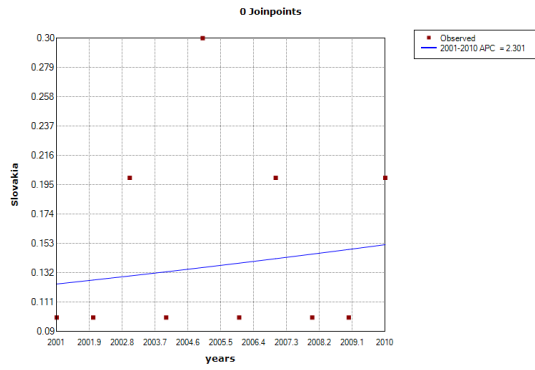

# Africa

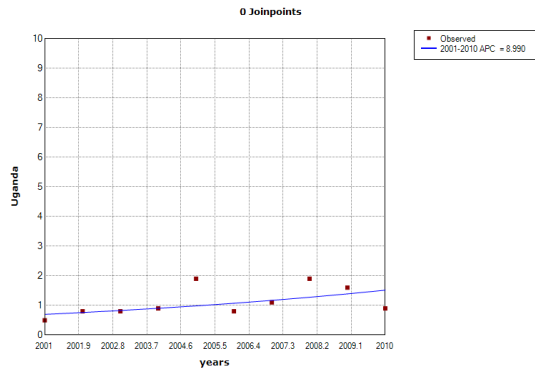

g.) Incidence male aged above 50 years old

## Asia

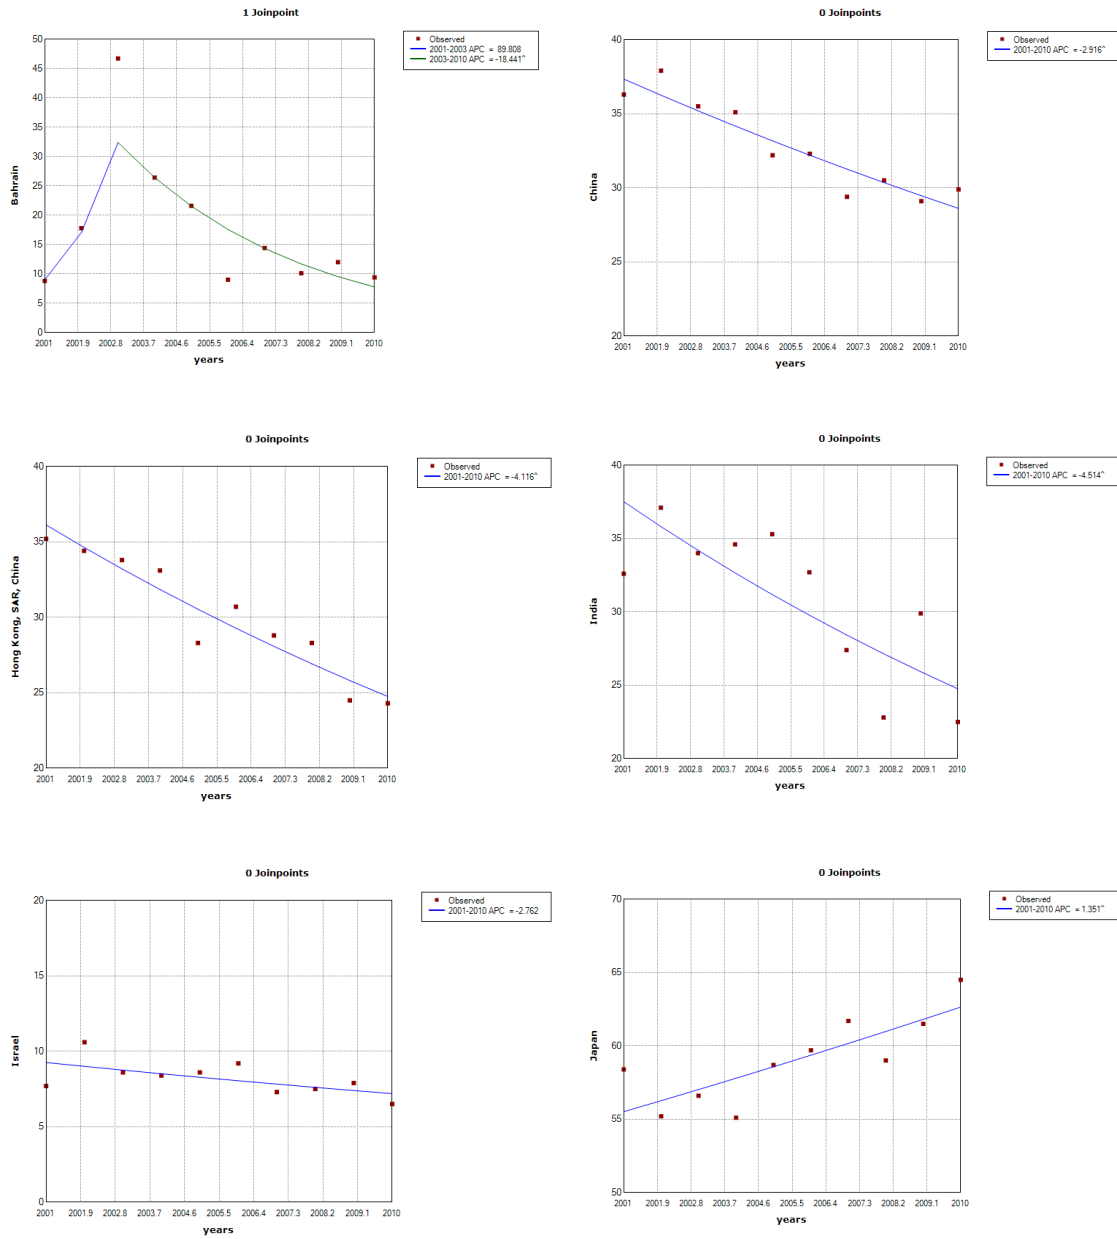

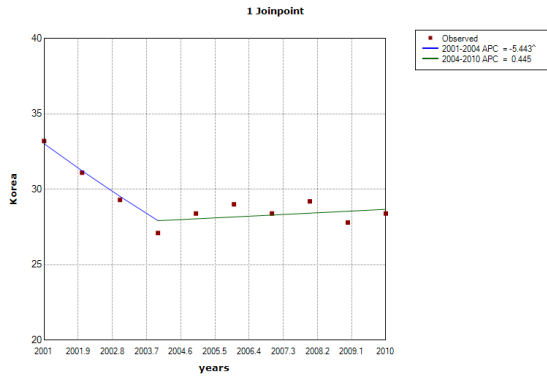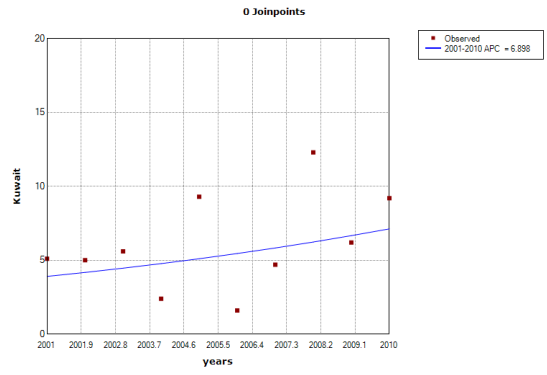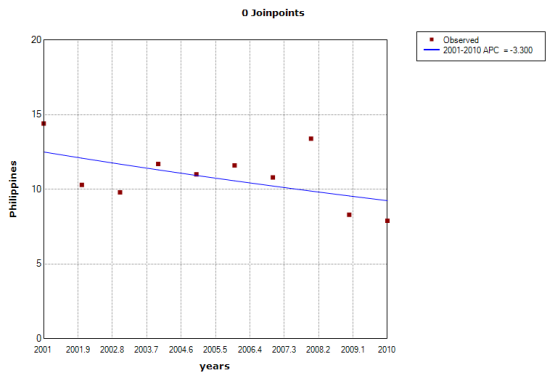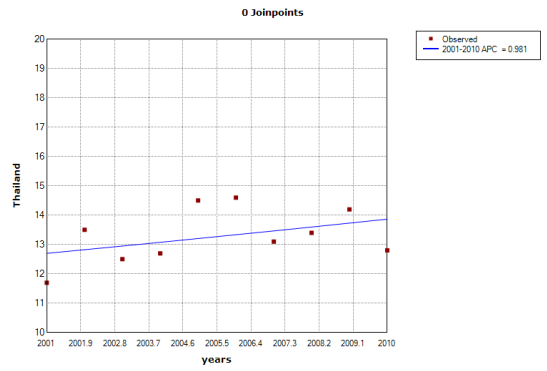

## Oceania

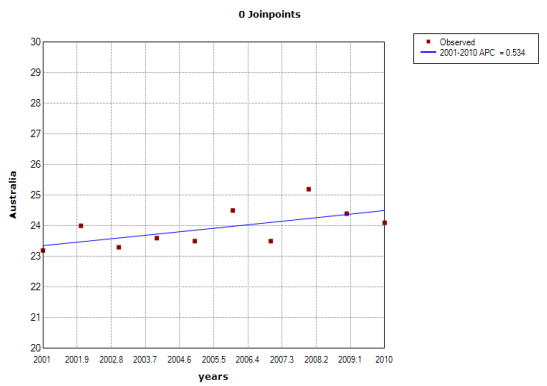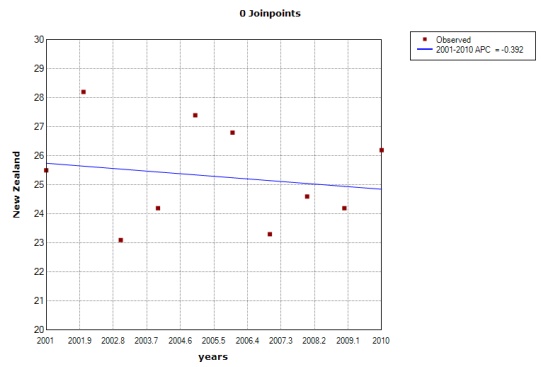

# Northern America

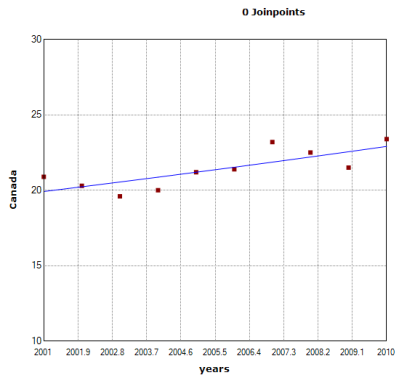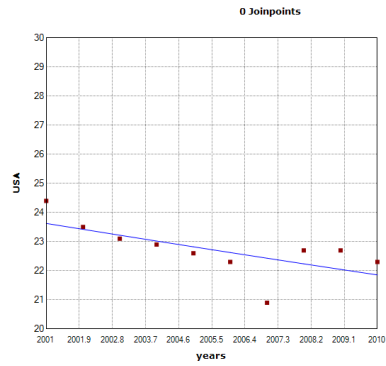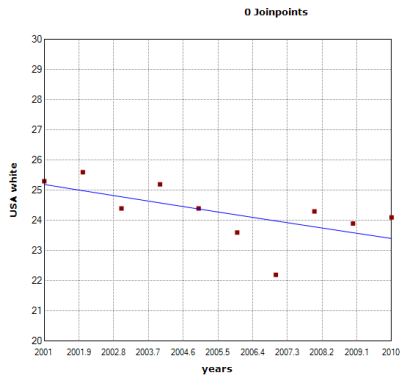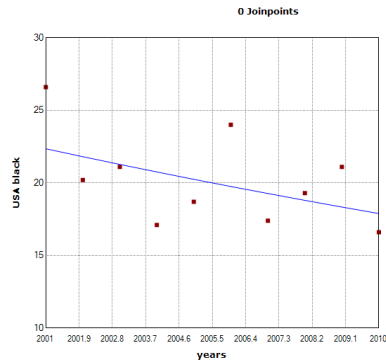

# Southern America

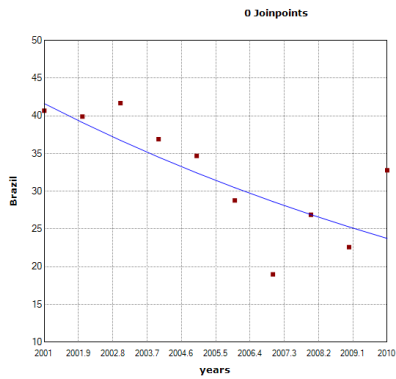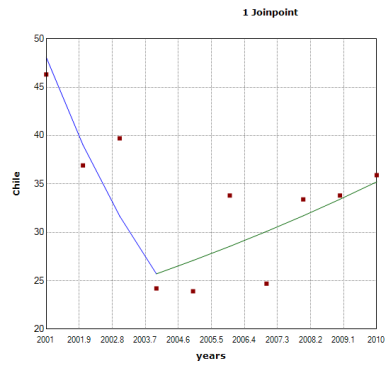

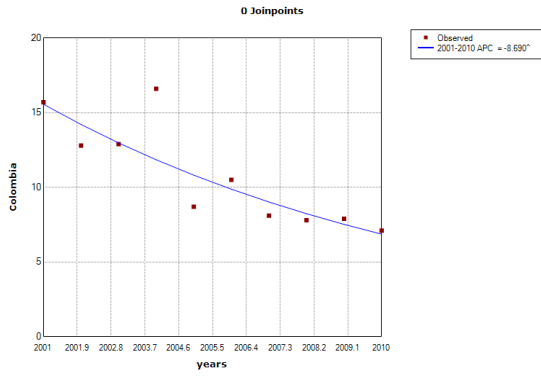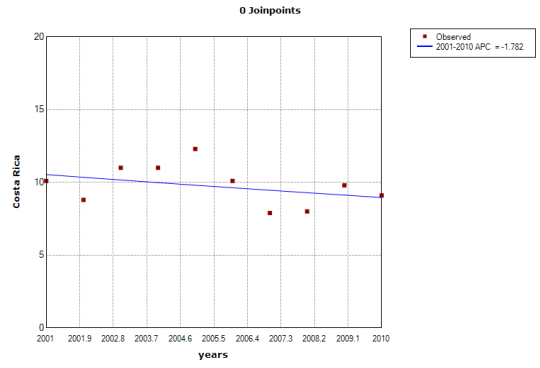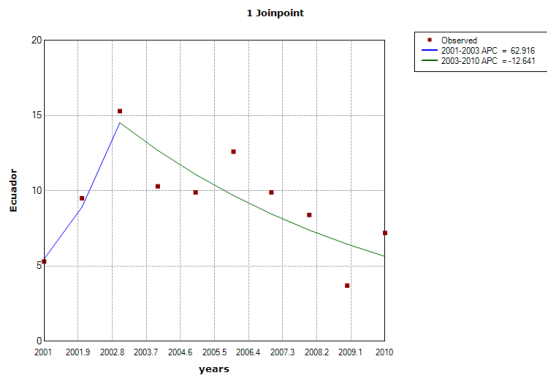

## Northern Europe

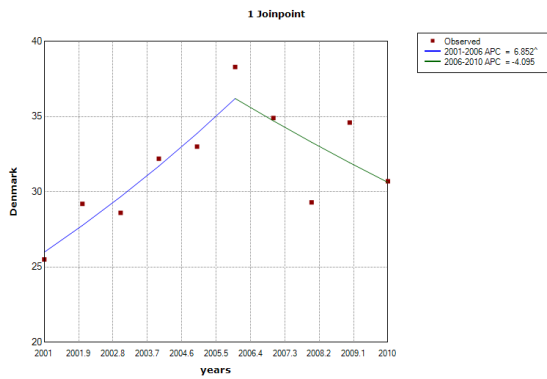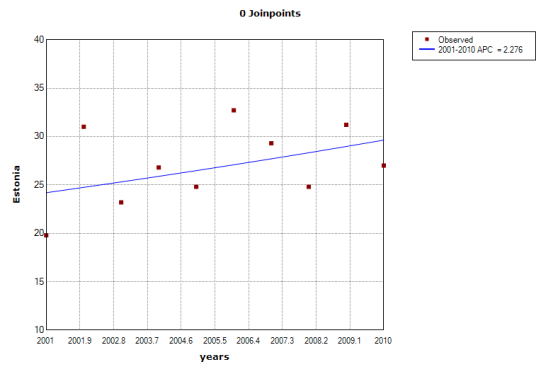

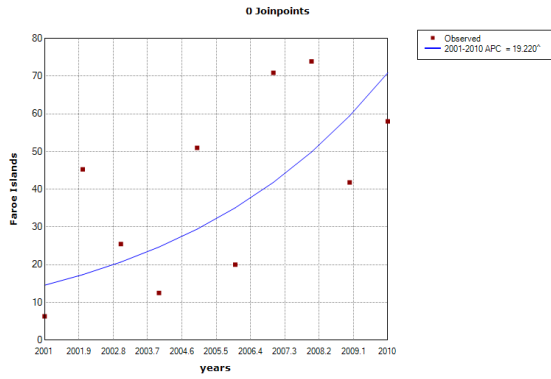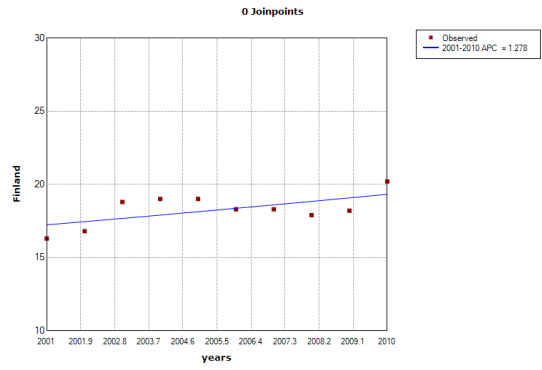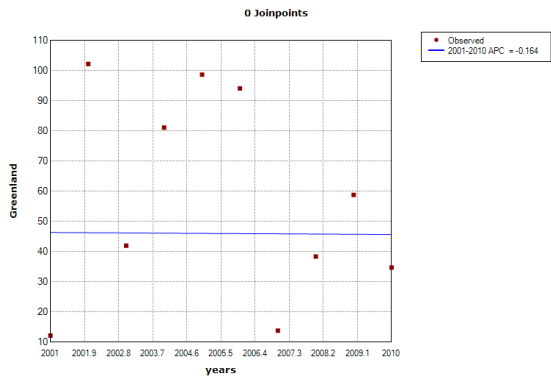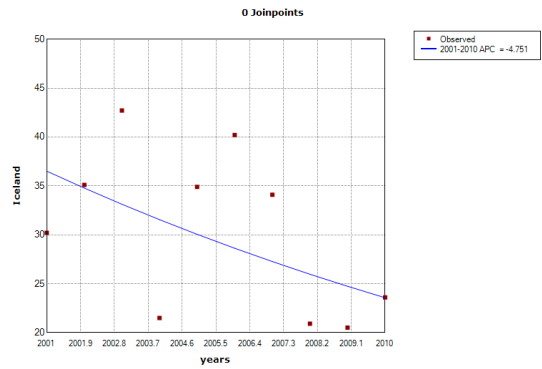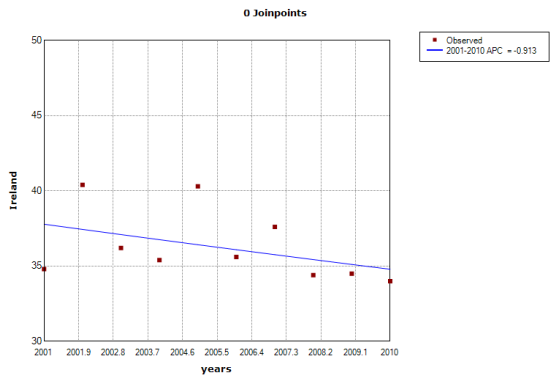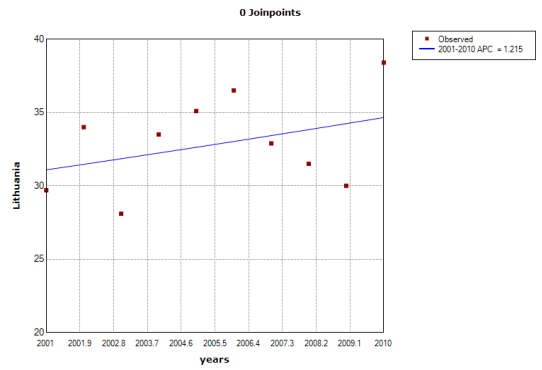

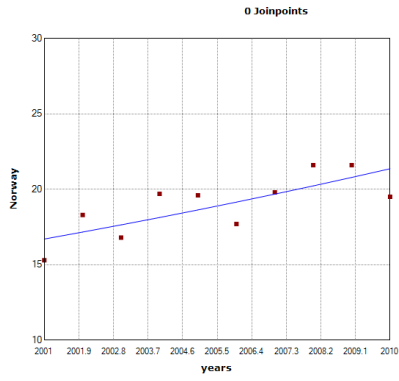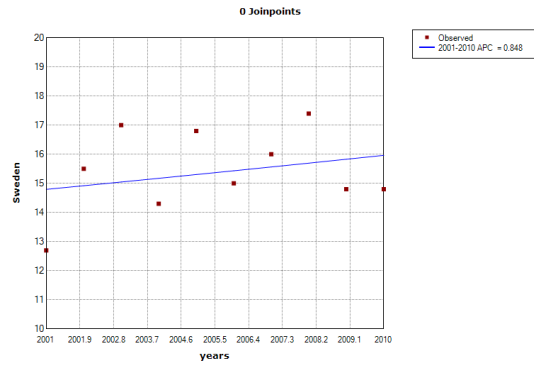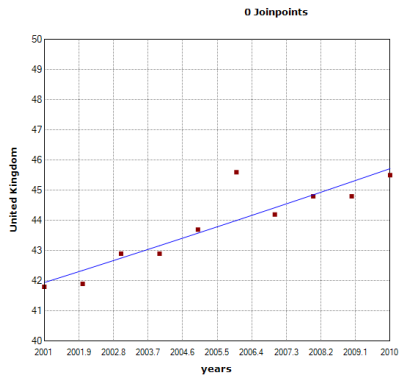

## Western Europe

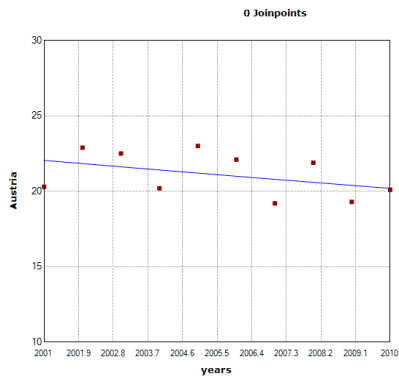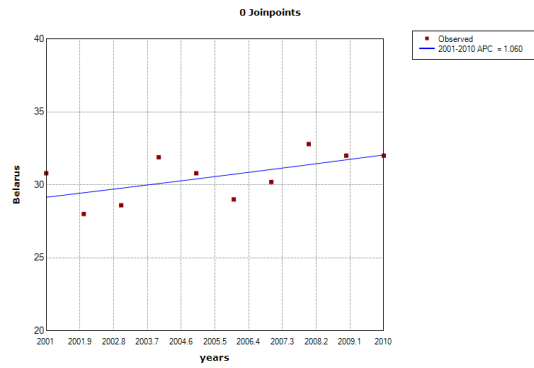



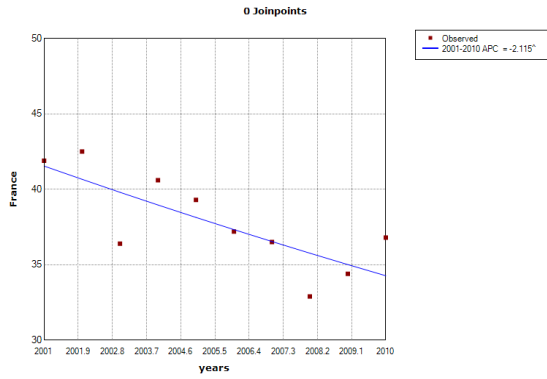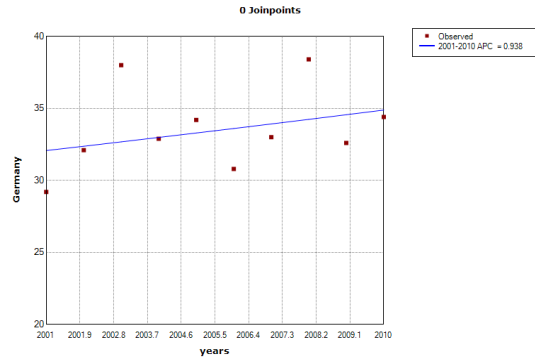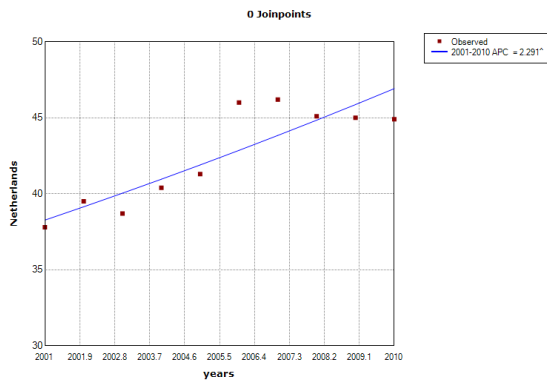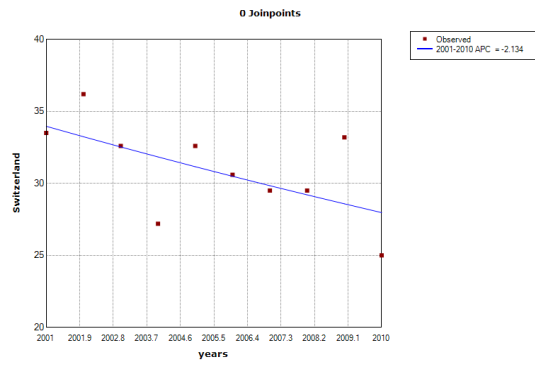

## Southern Europe

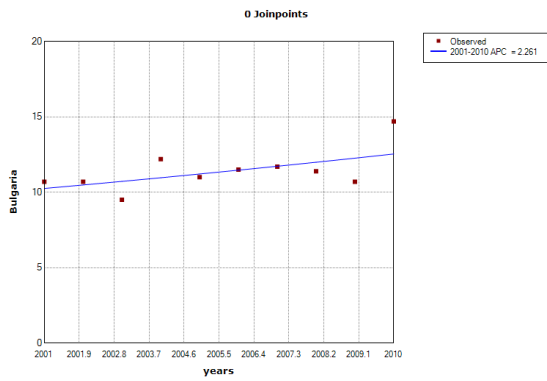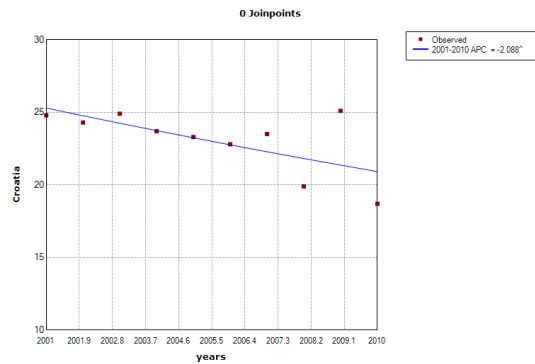

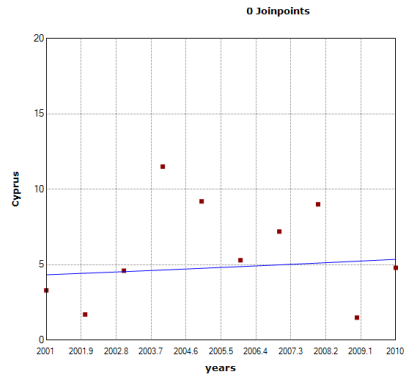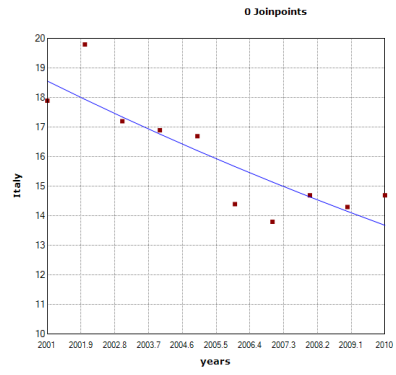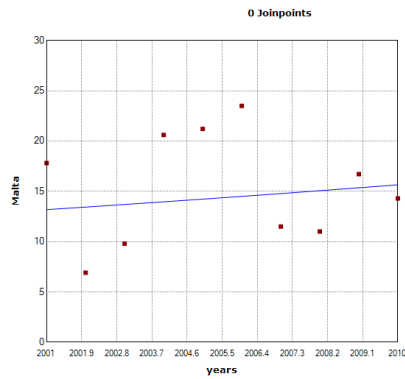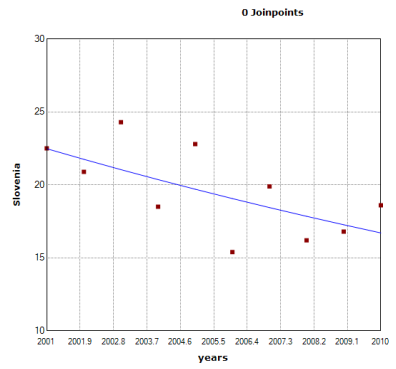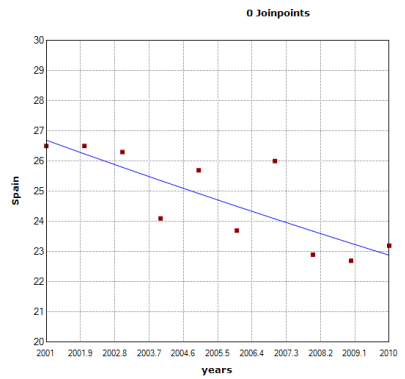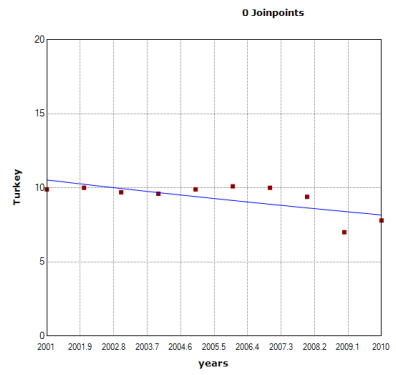

# Eastern Europe

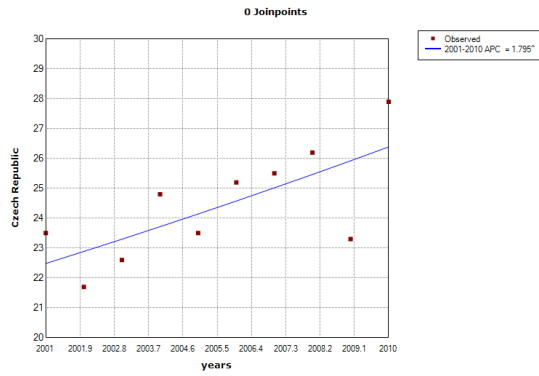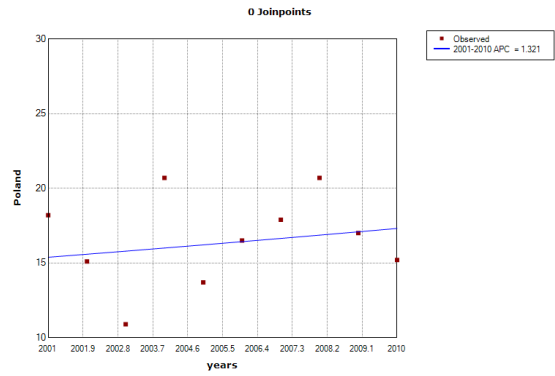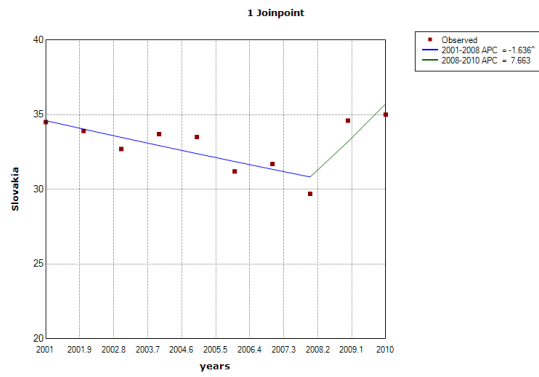

# Africa

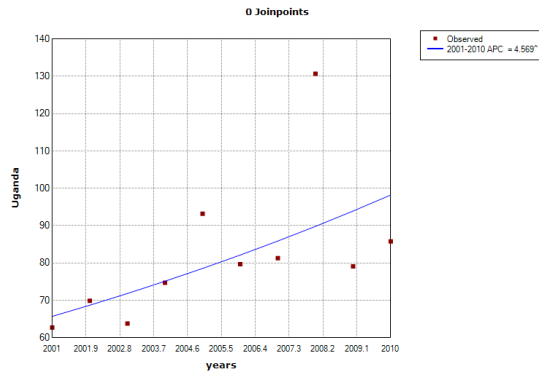

h.) Incidence female aged above 50 years old

Asia

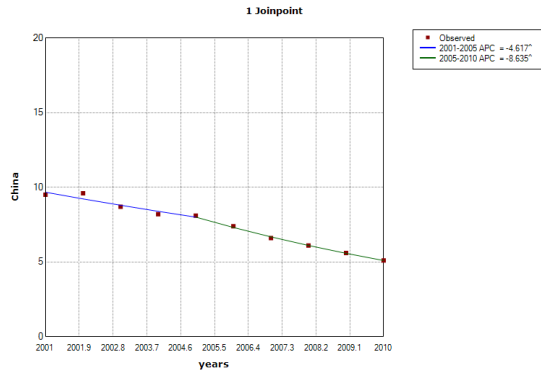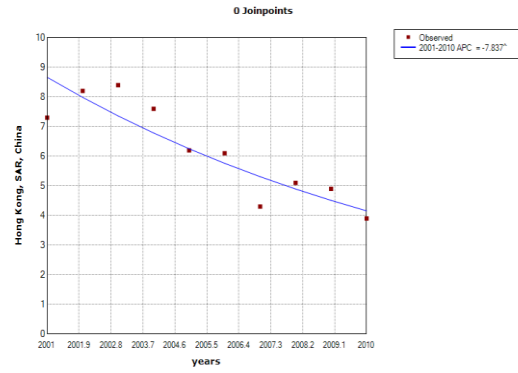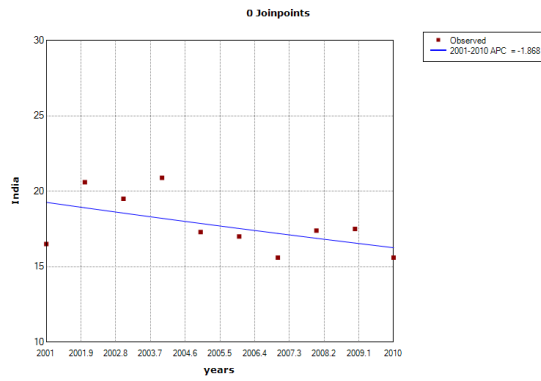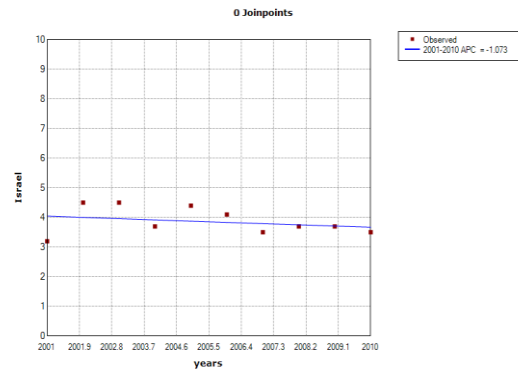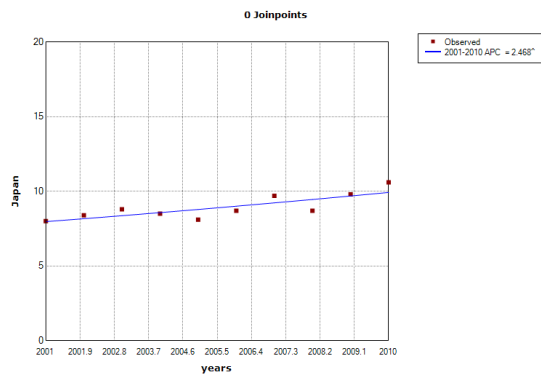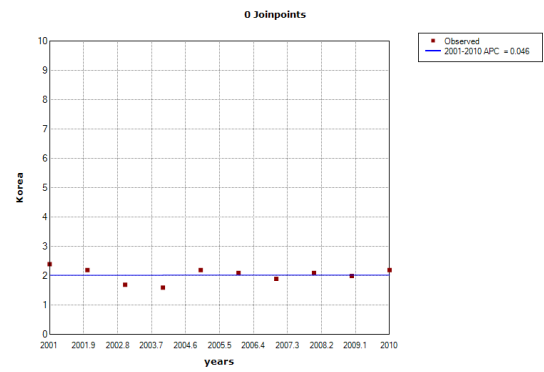

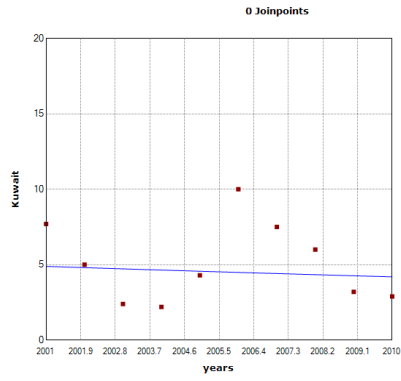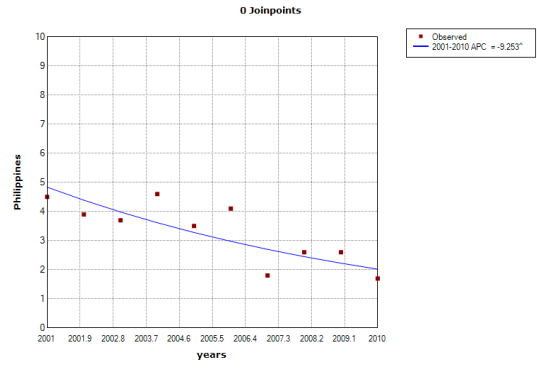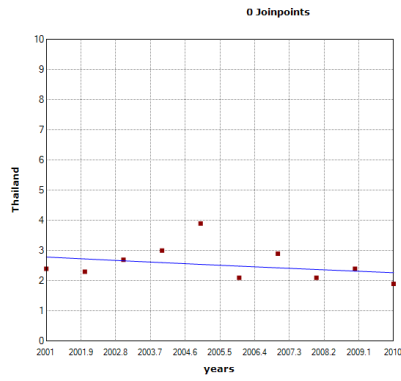

## Oceania

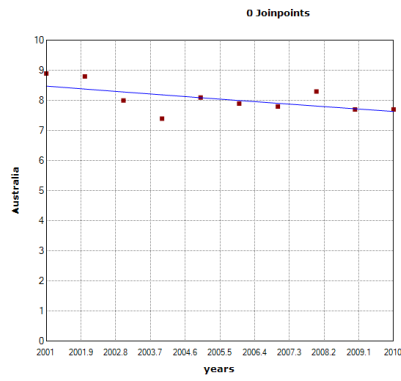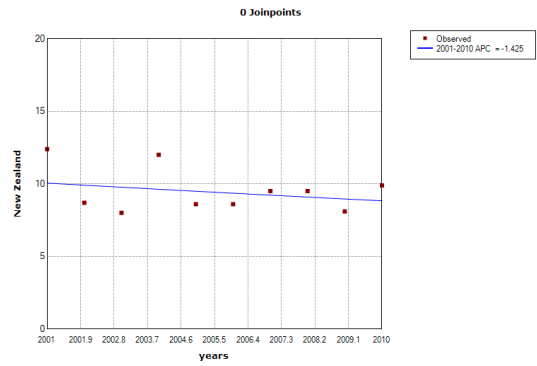

# Northern America

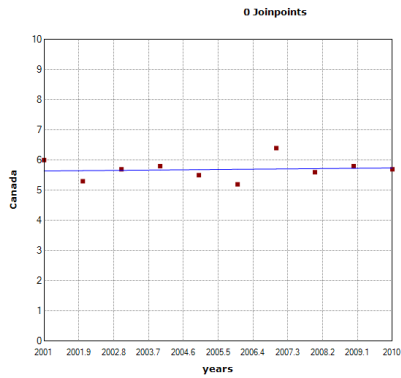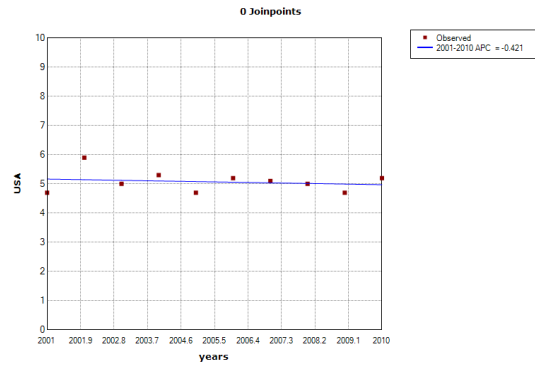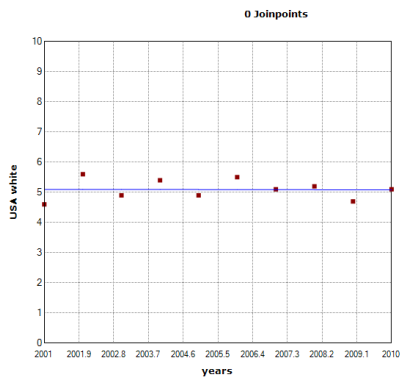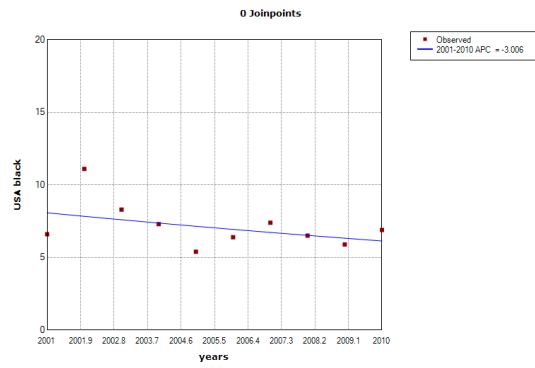

# Southern America

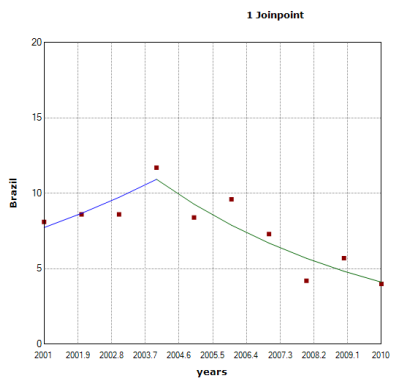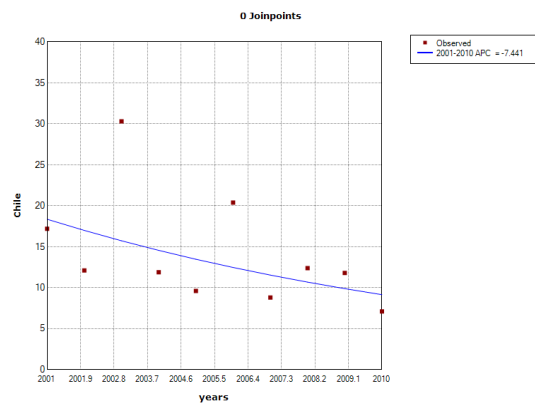

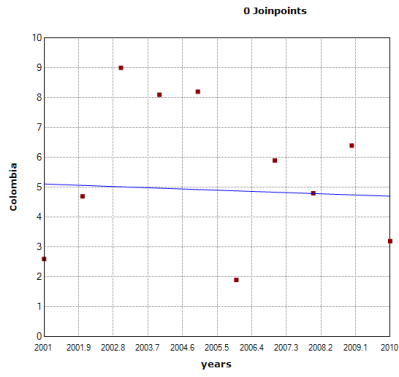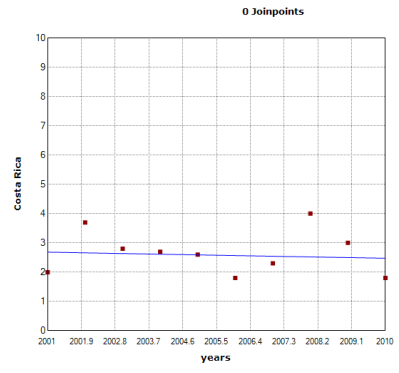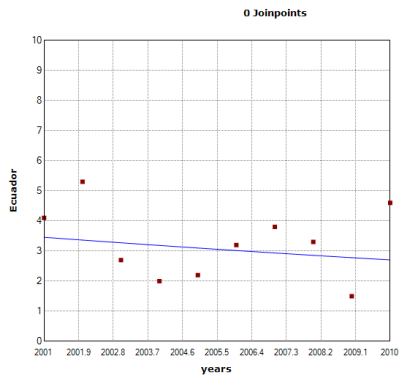

## Northern Europe

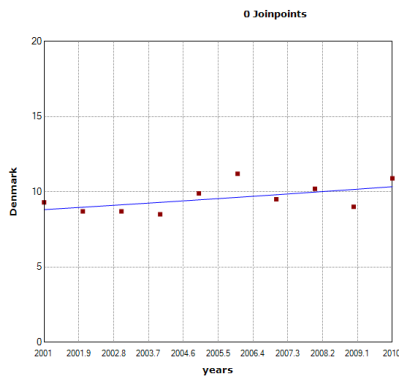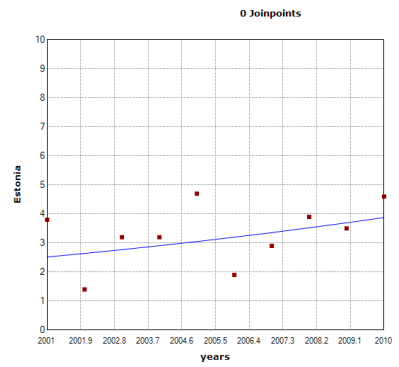

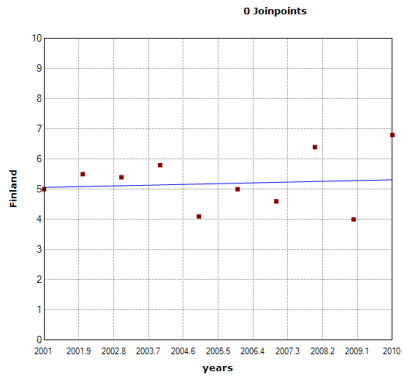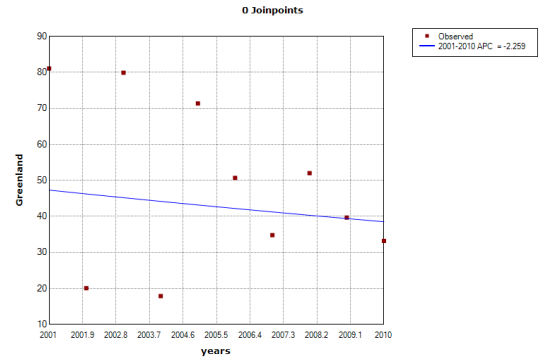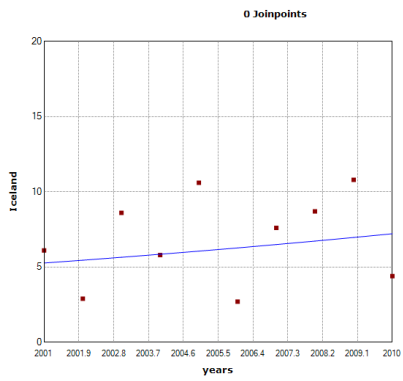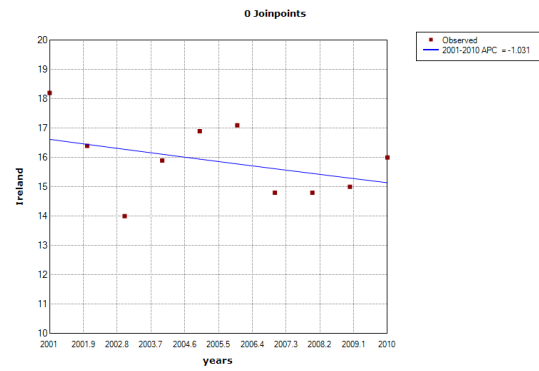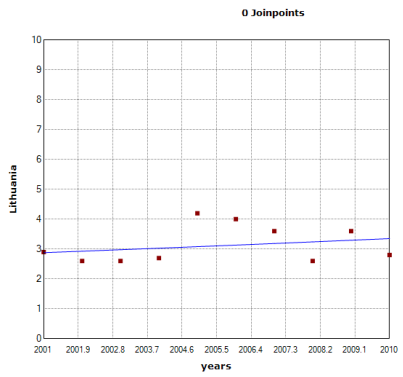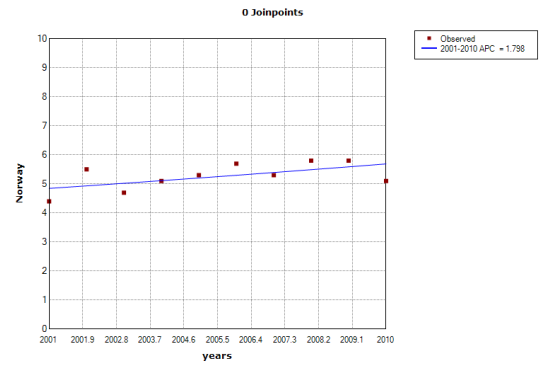



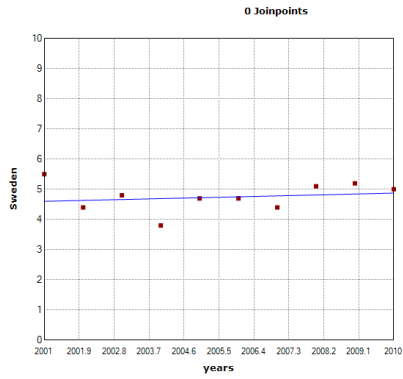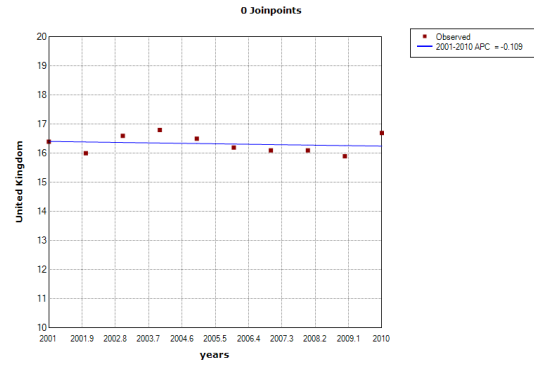

## Western Europe

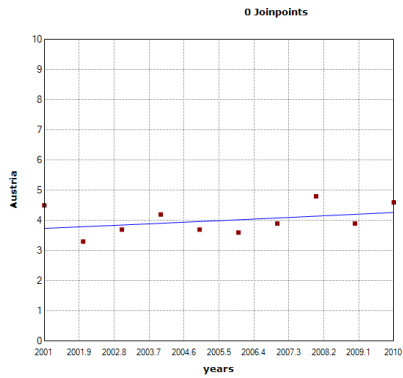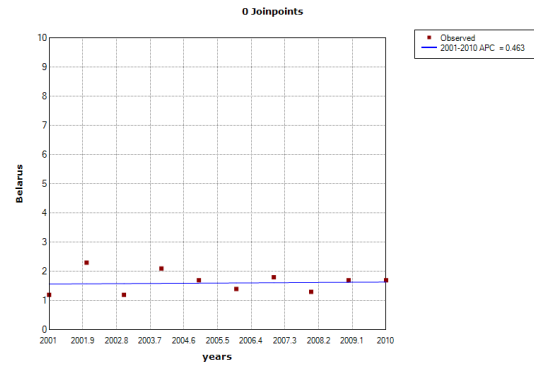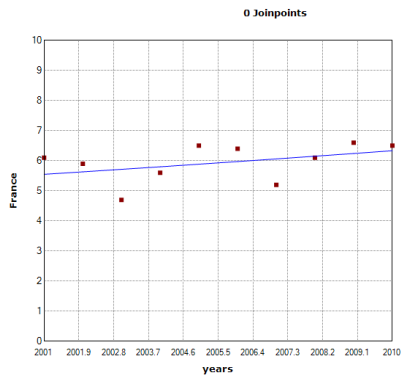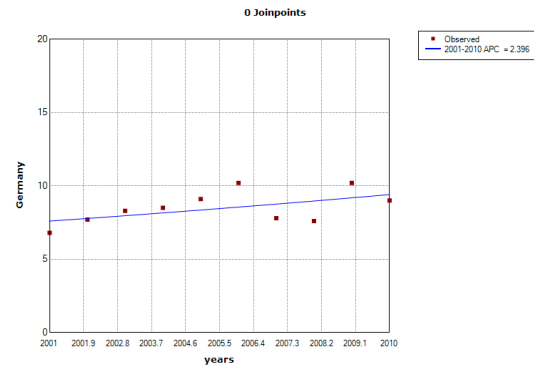

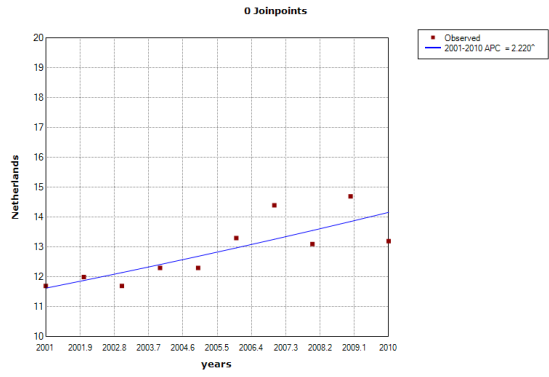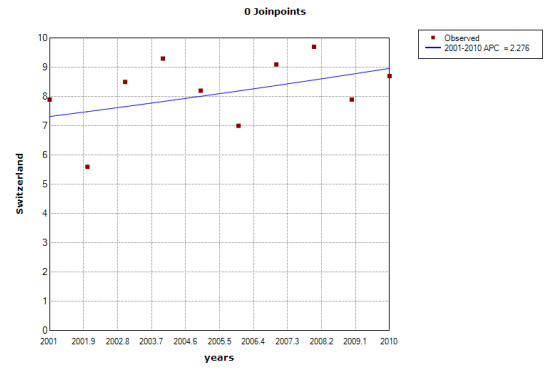

## Southern Europe

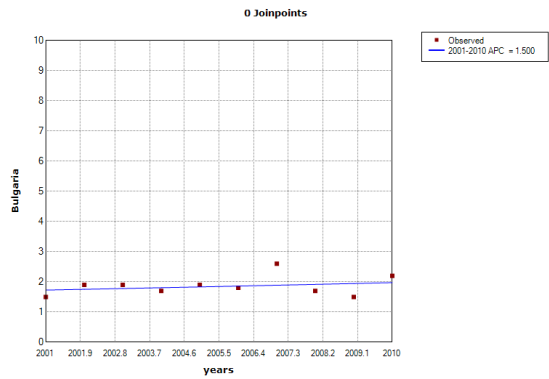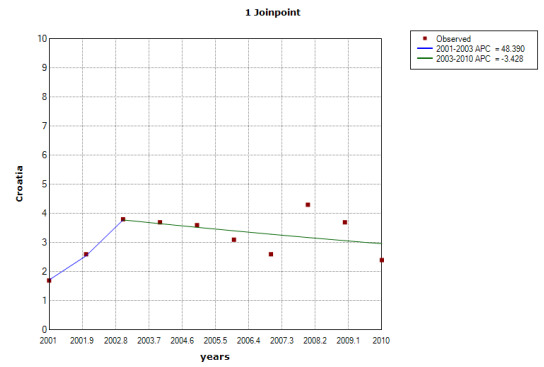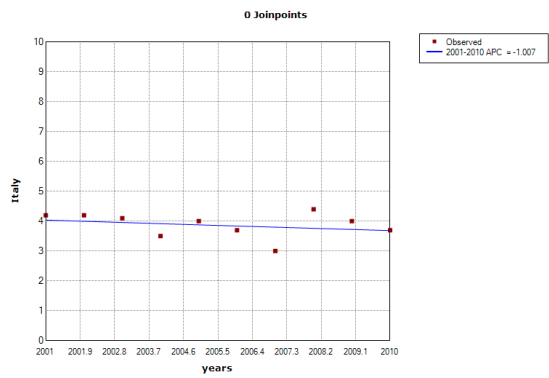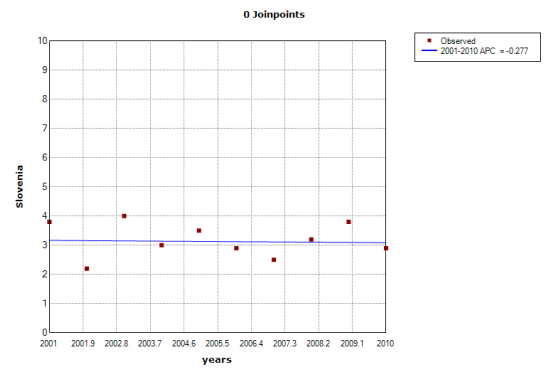

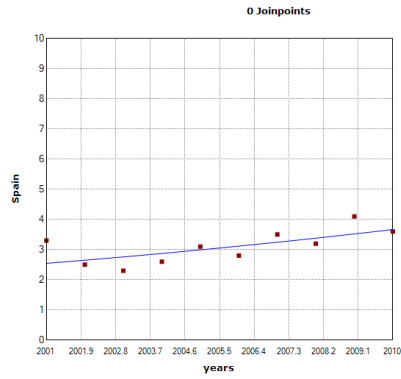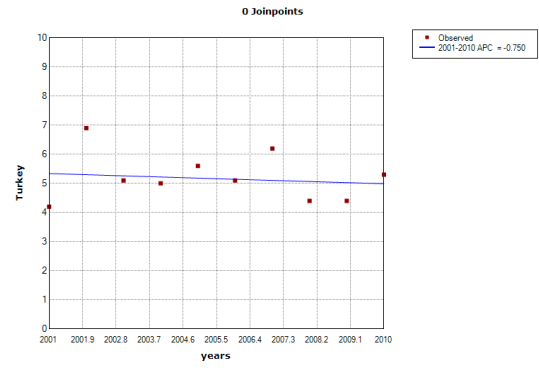

## Eastern Europe

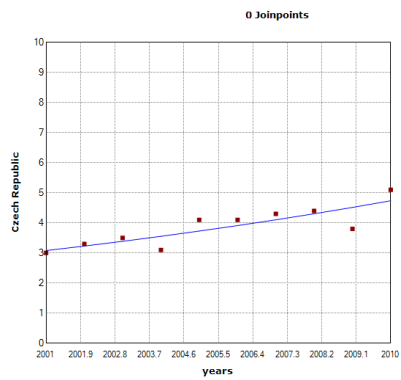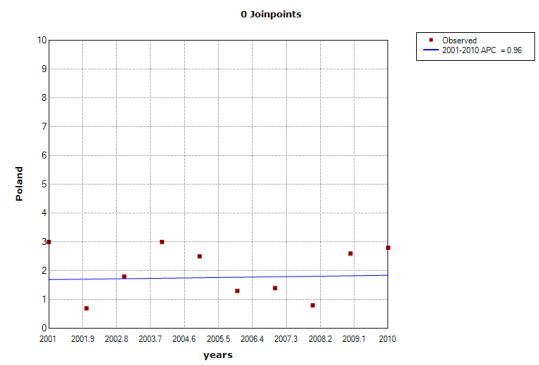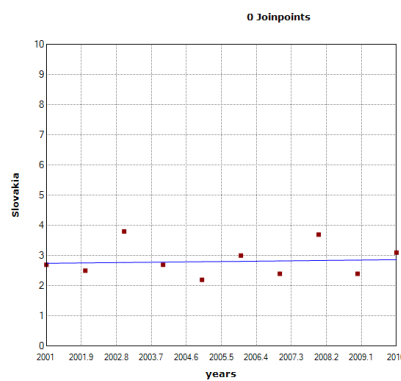

# Africa

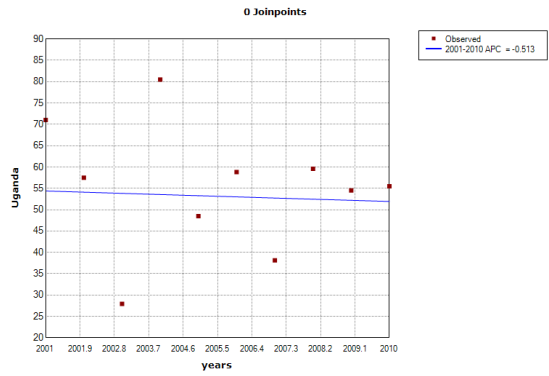

i.) mortality male aged from 0 to 85 years old

## Asia

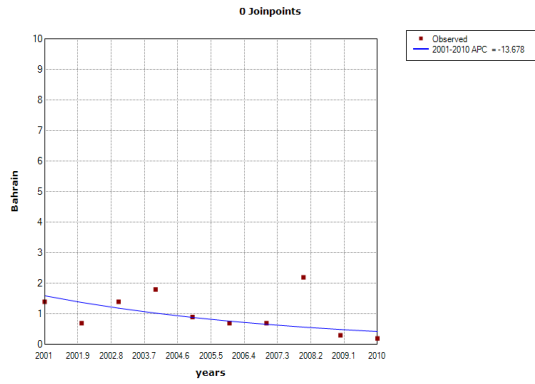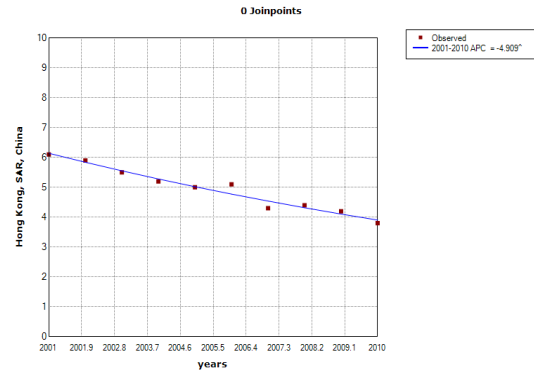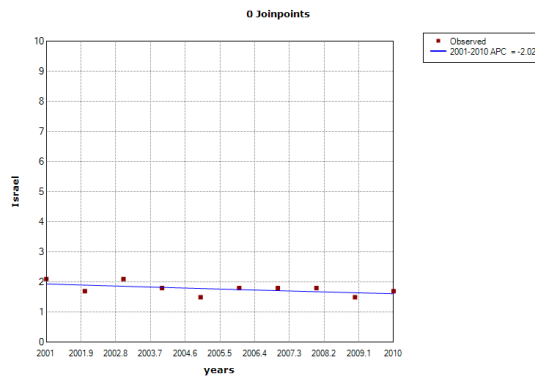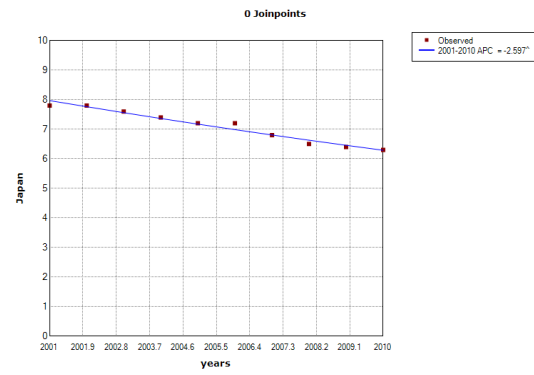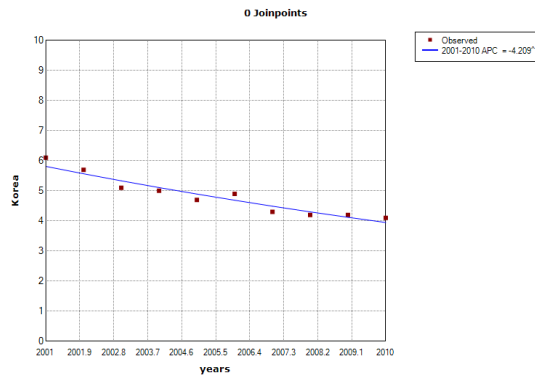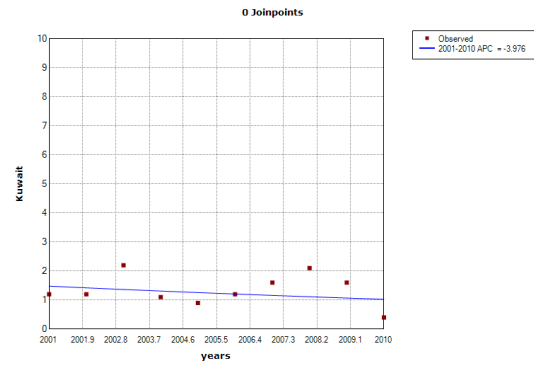

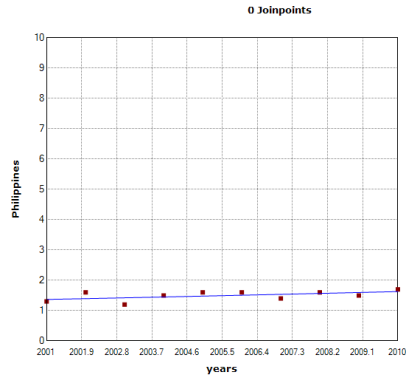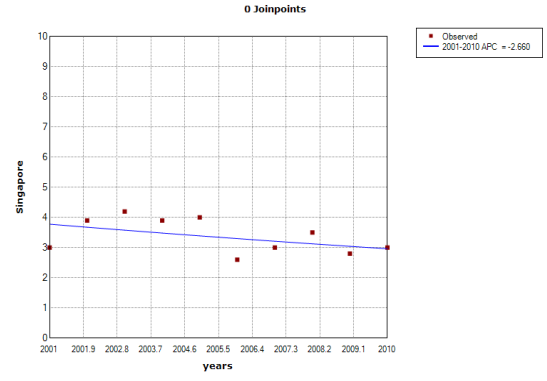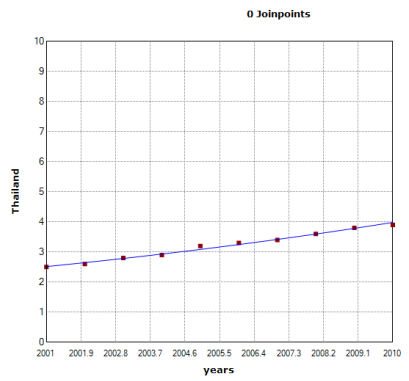

## Oceania

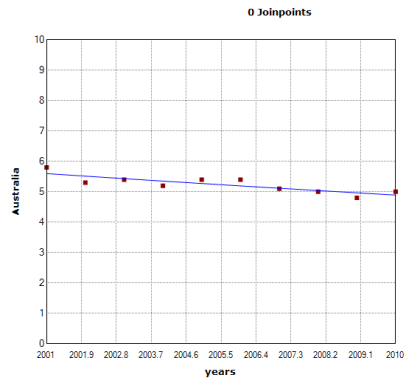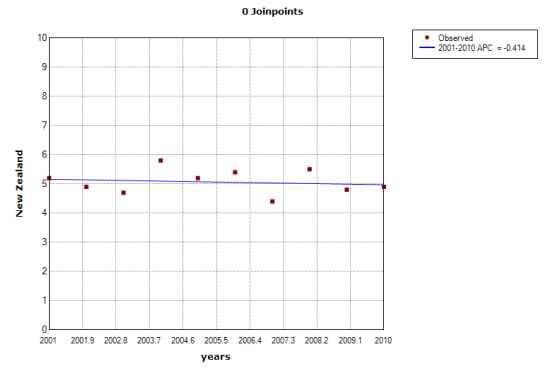

# Northern America

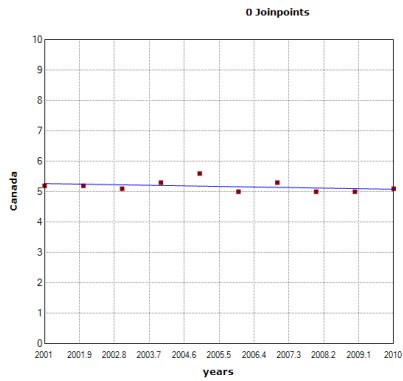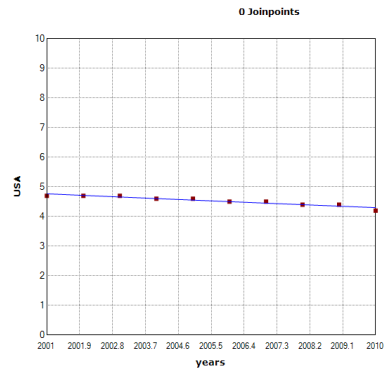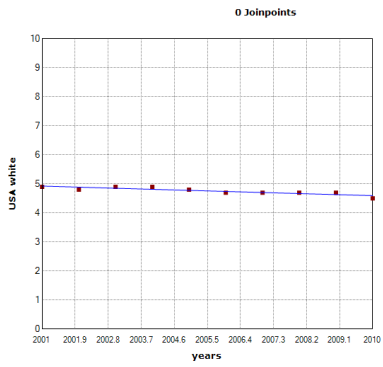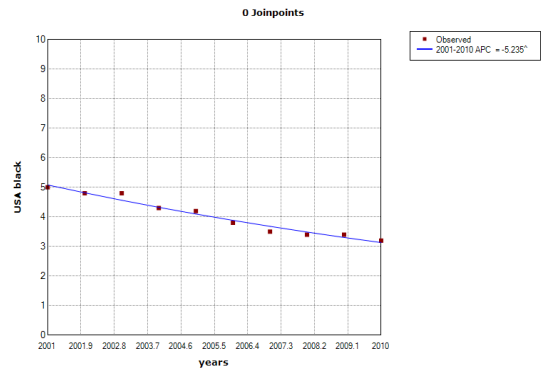

# Southern America

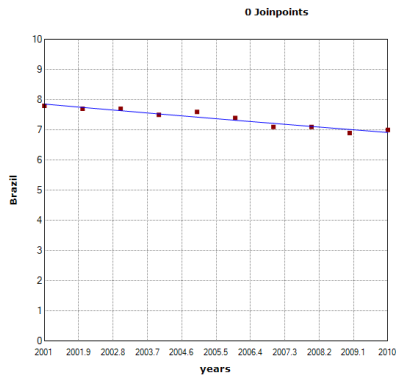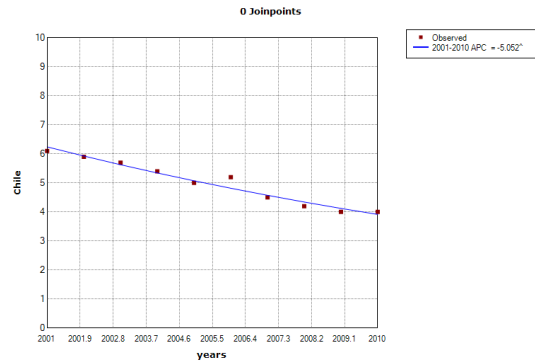

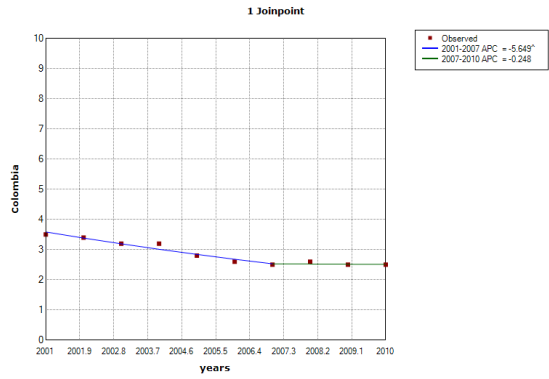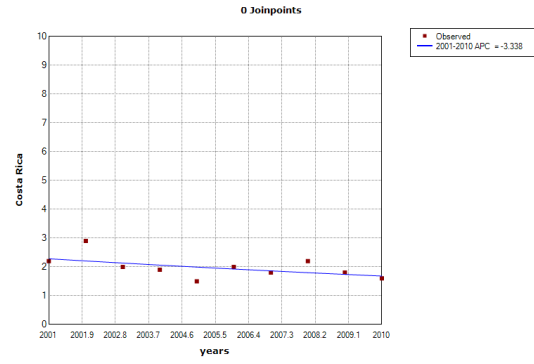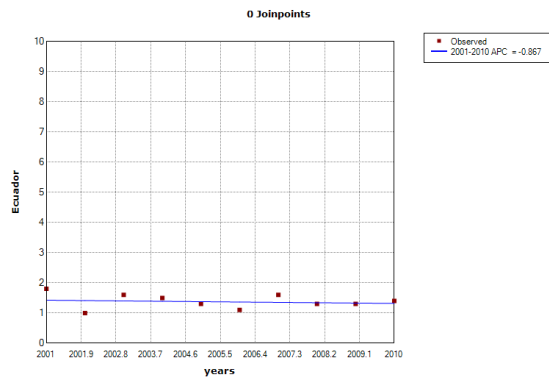

## Northern Europe

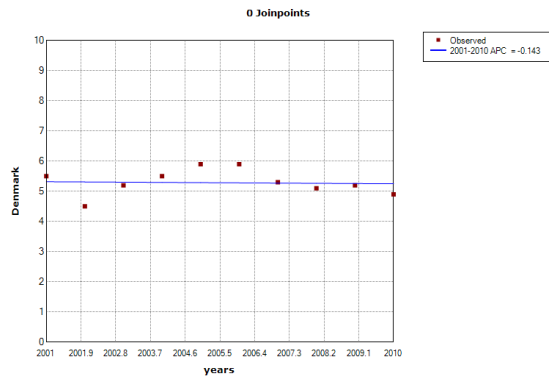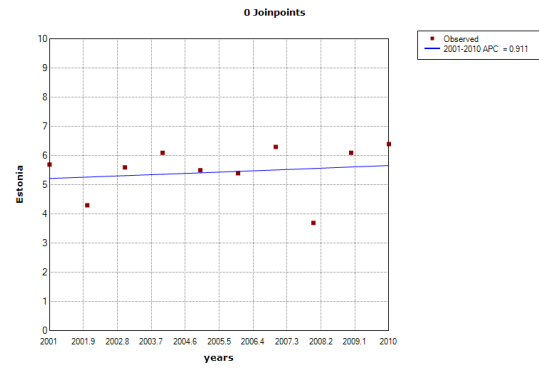



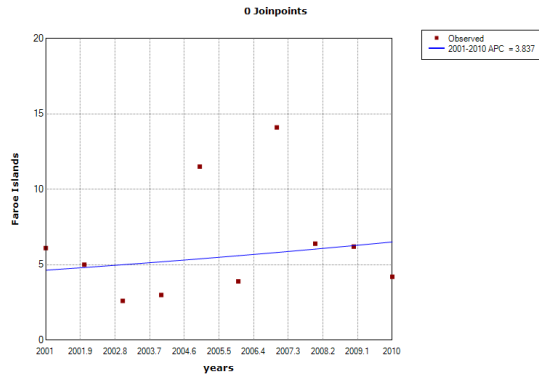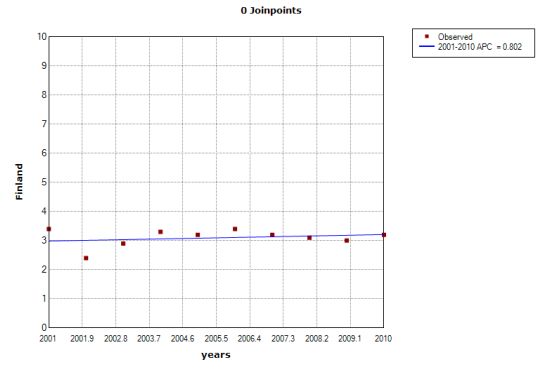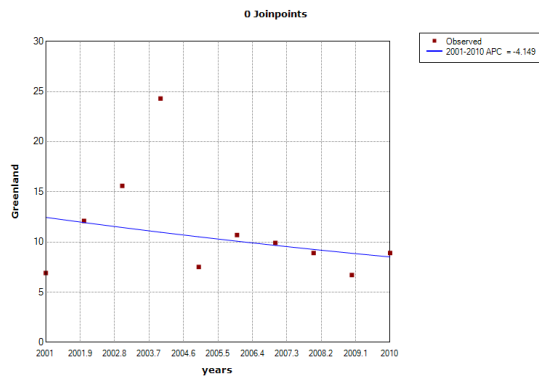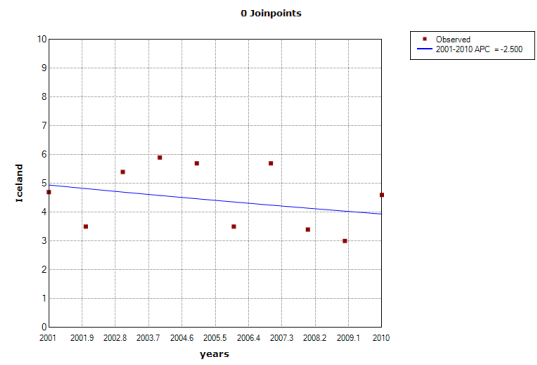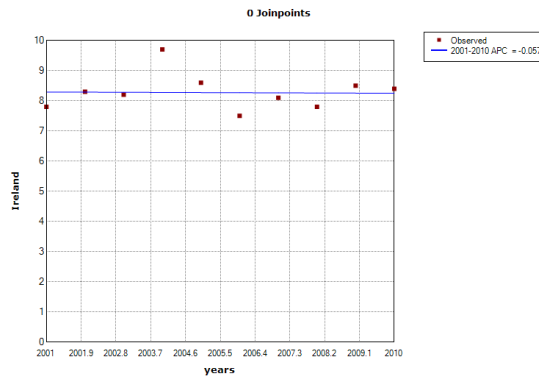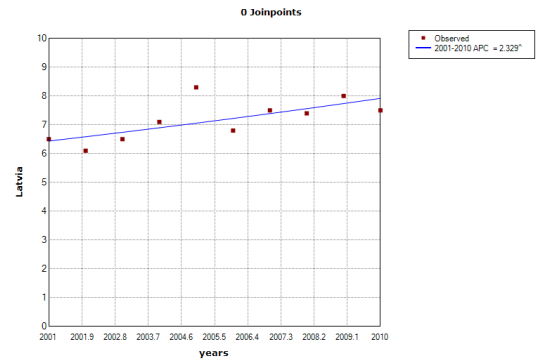

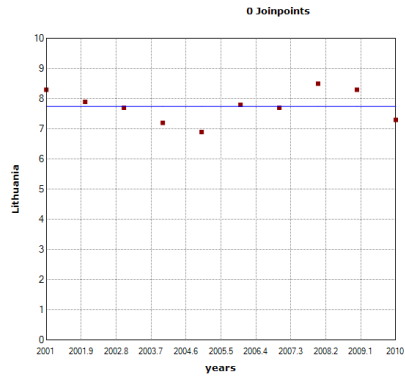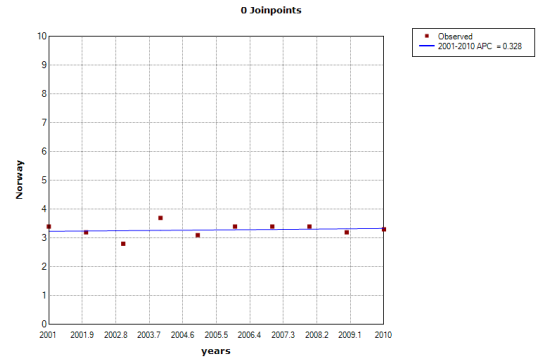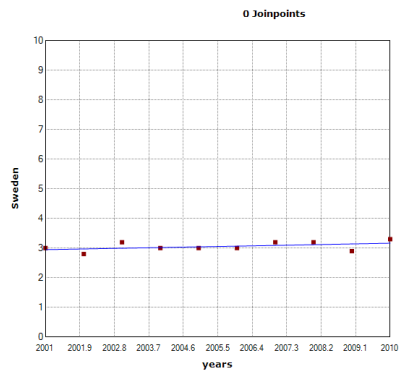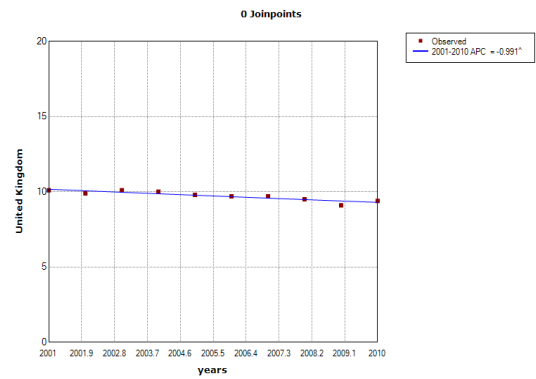

## Western Europe

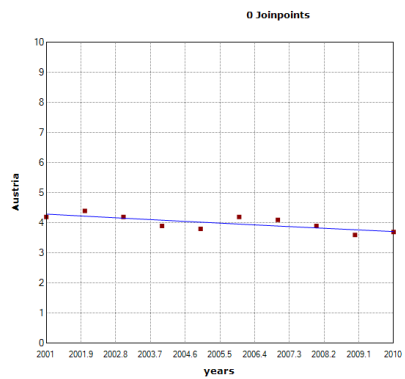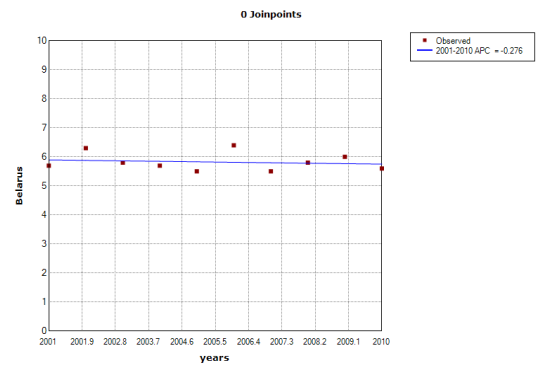

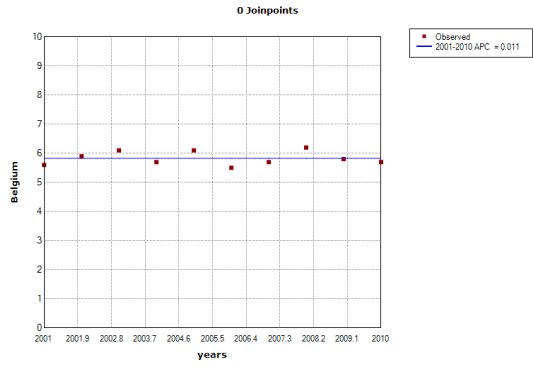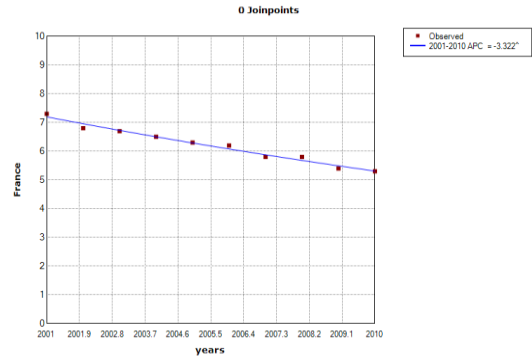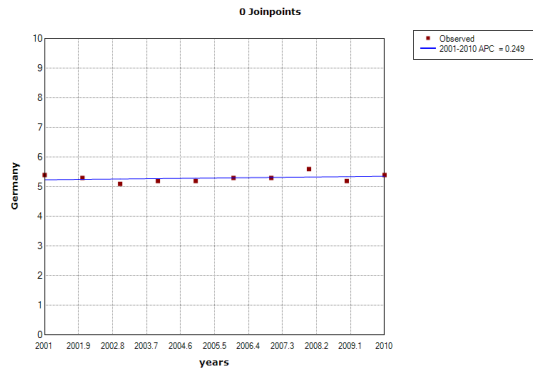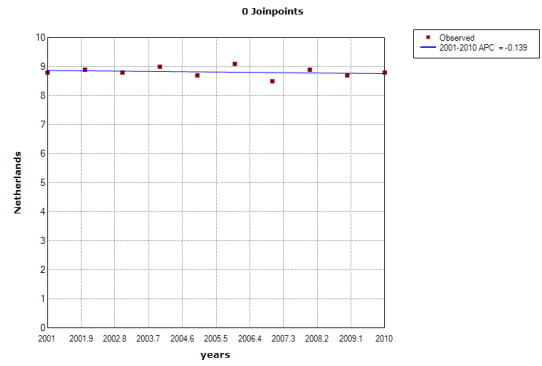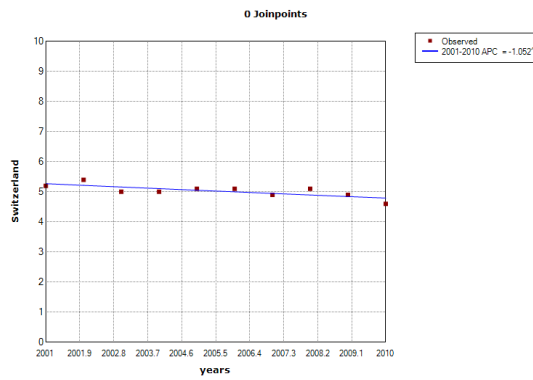

# Southern Europe

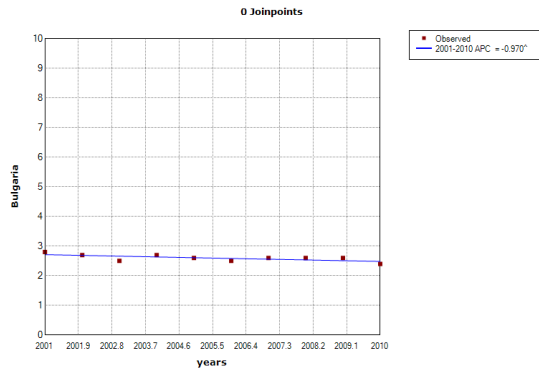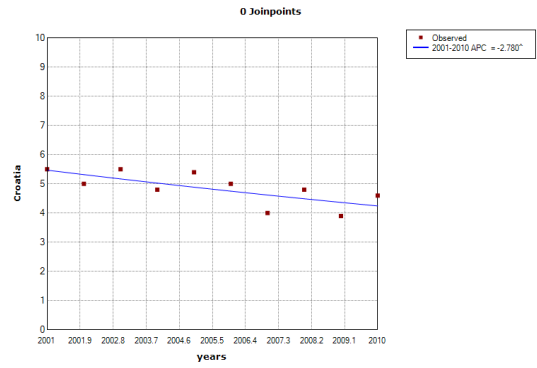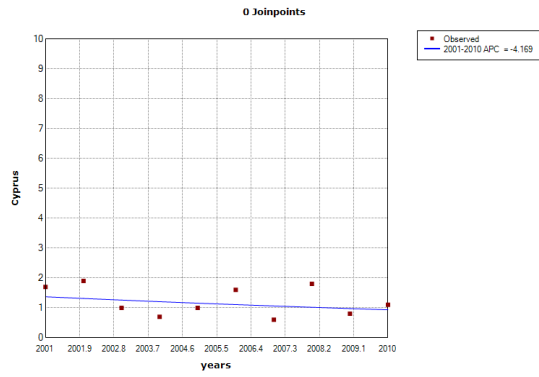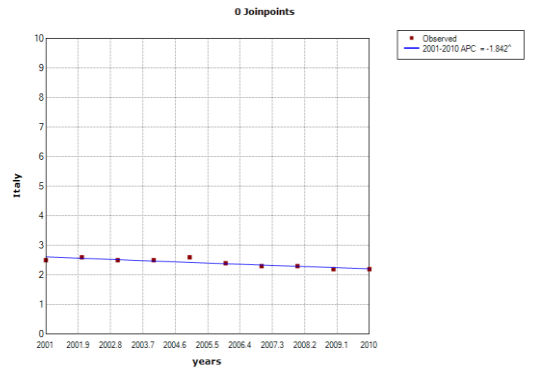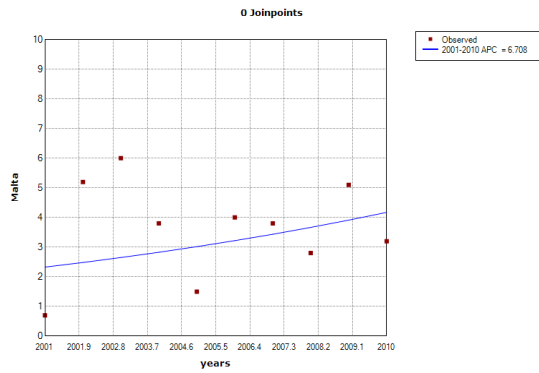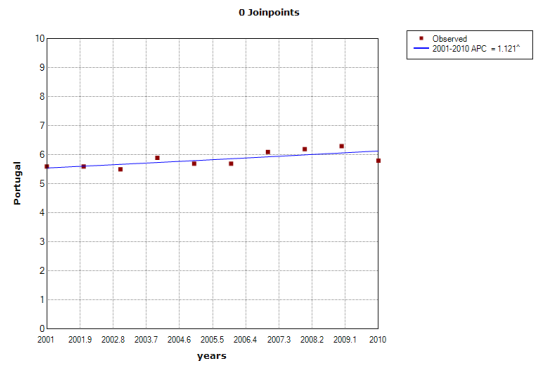

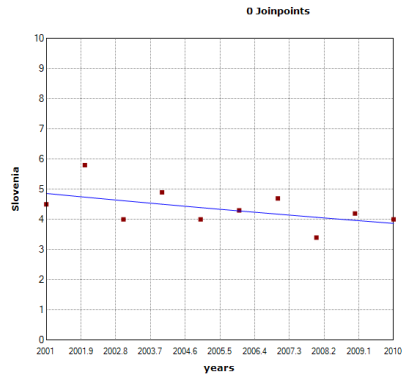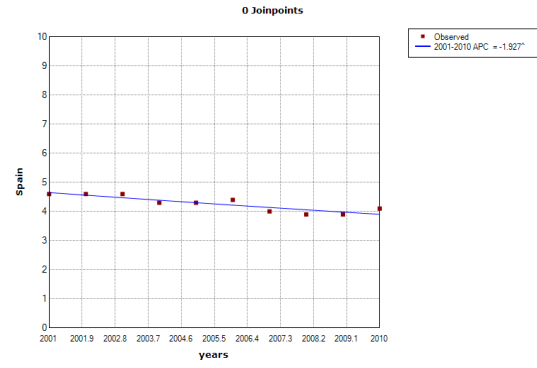

## Eastern Europe

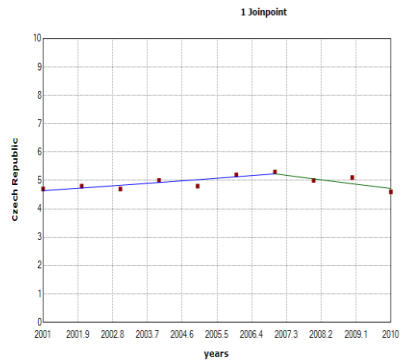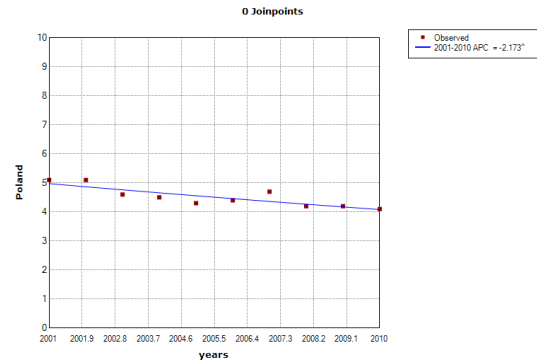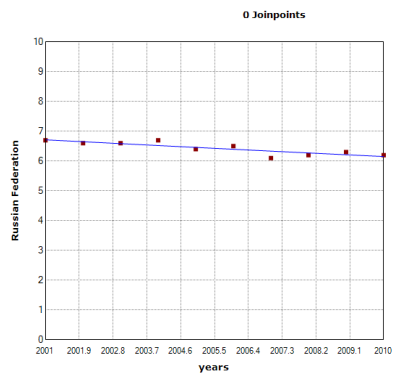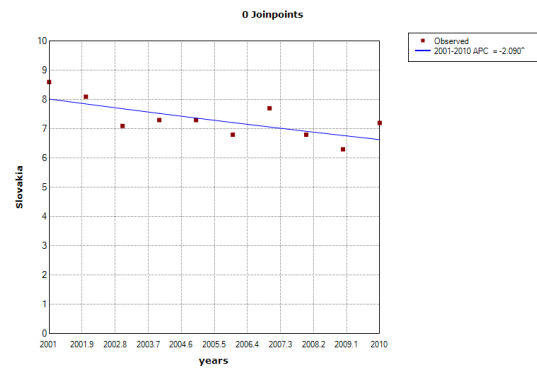

j.) mortality female aged from 0 to 85 years old

## Asia

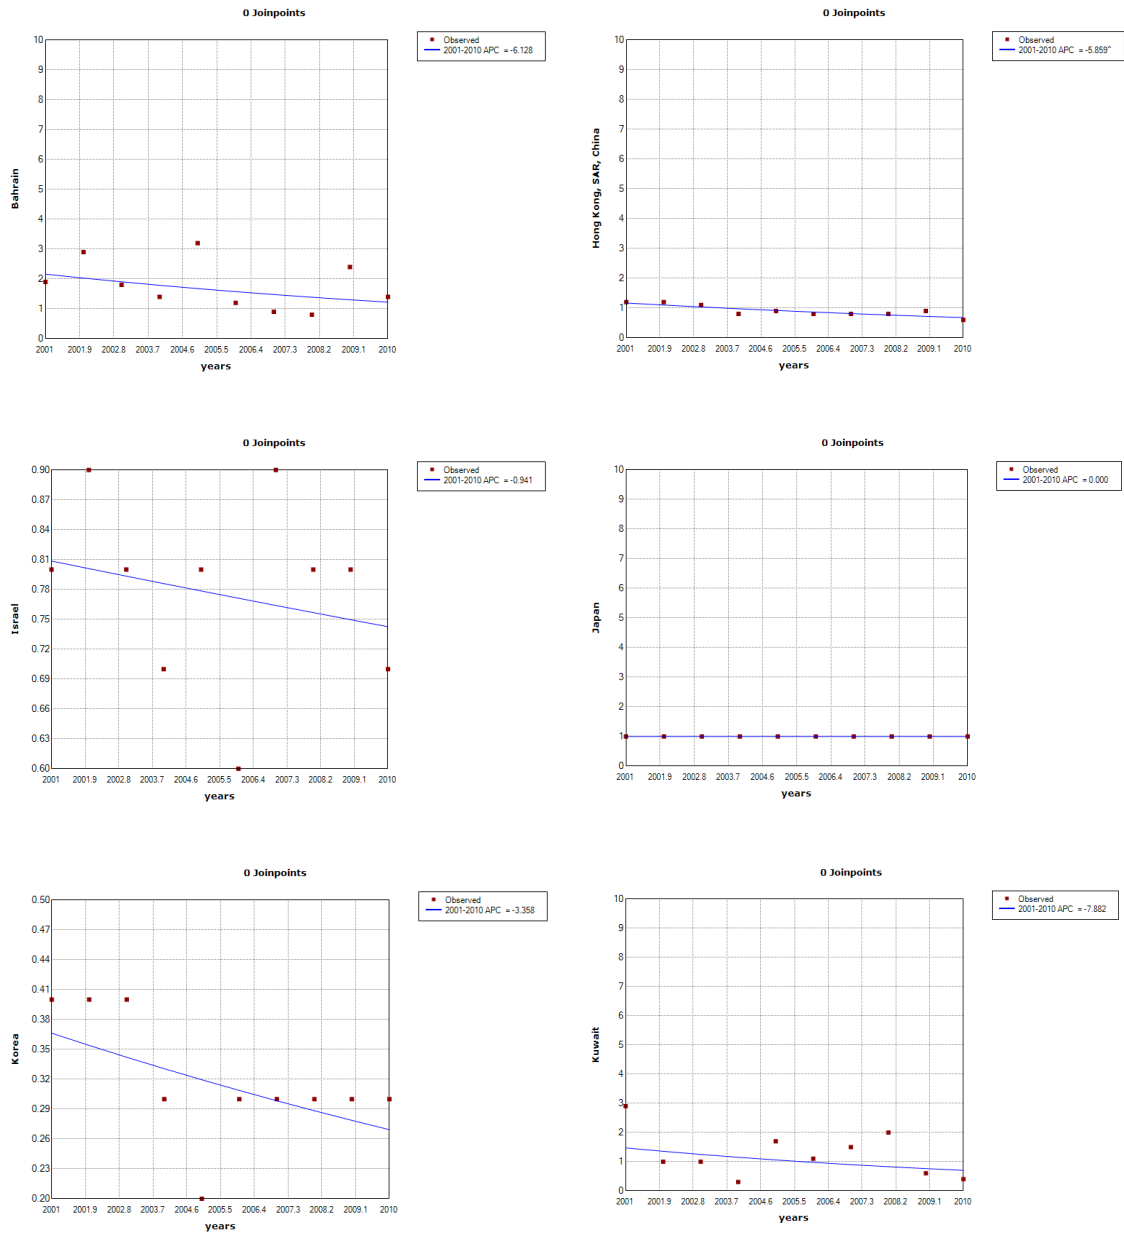

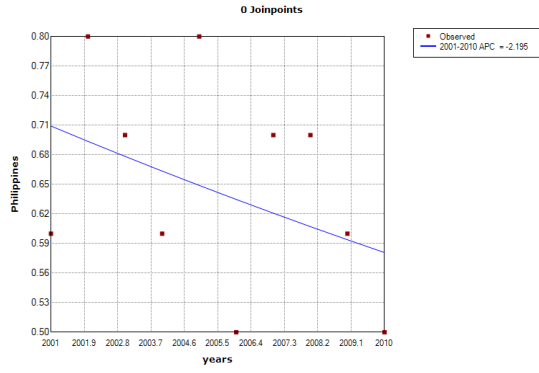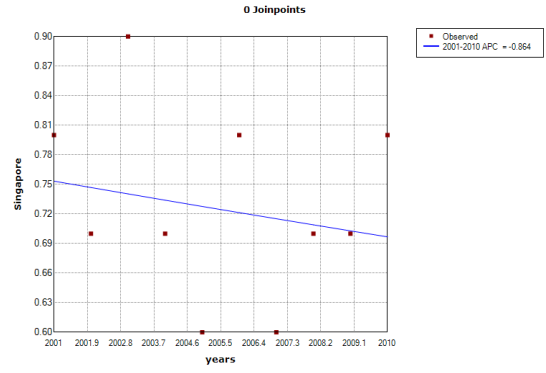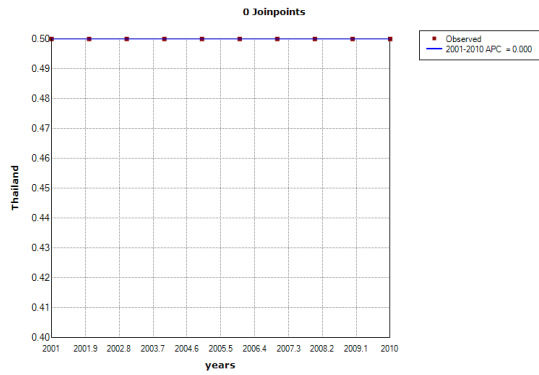

## Oceania

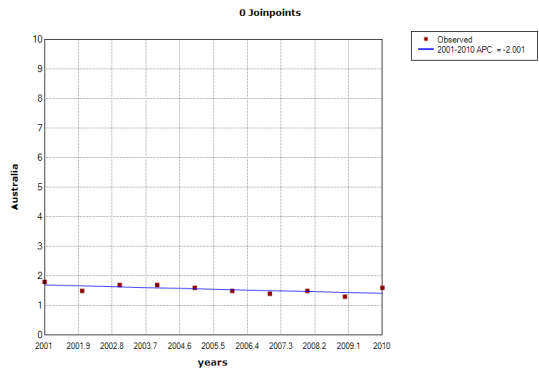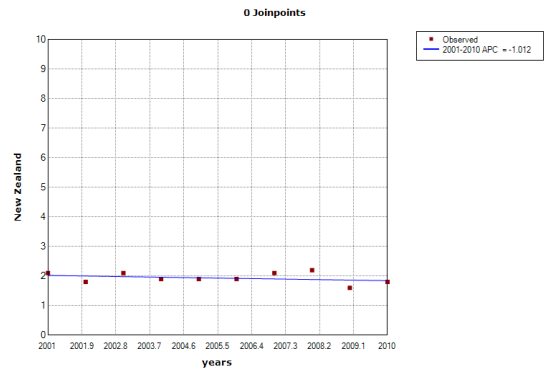

# Northern America

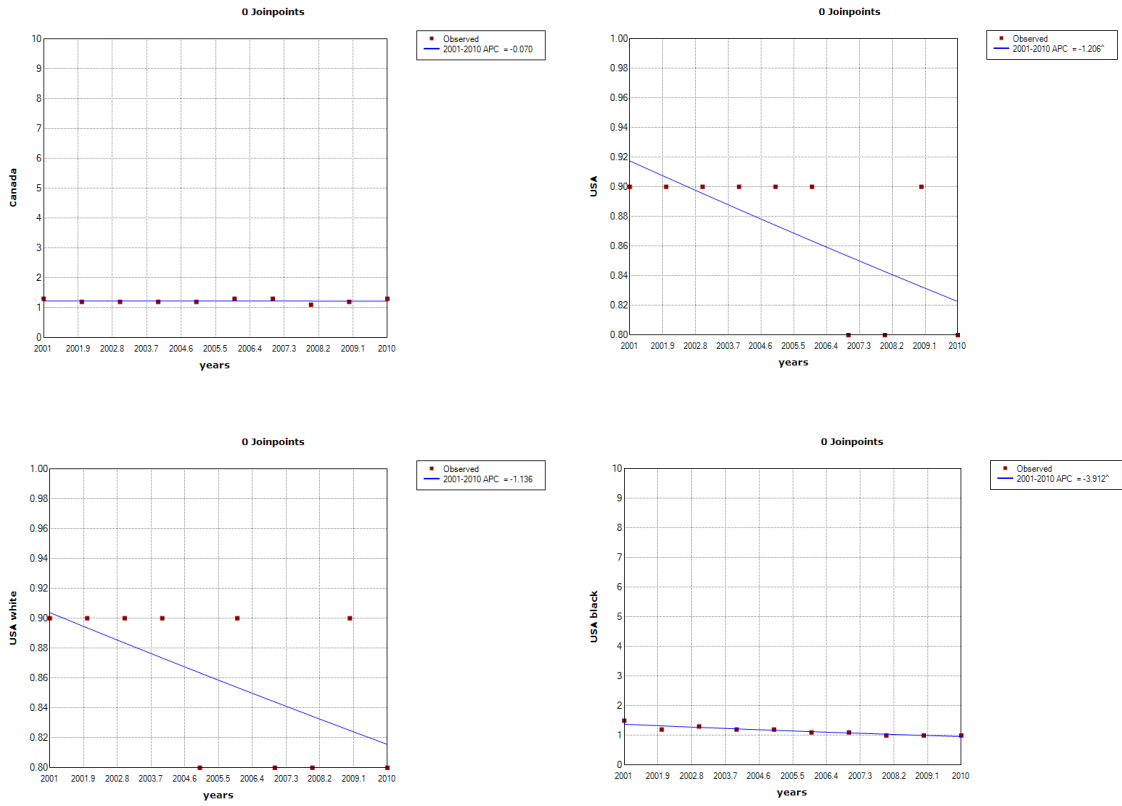

# Southern America

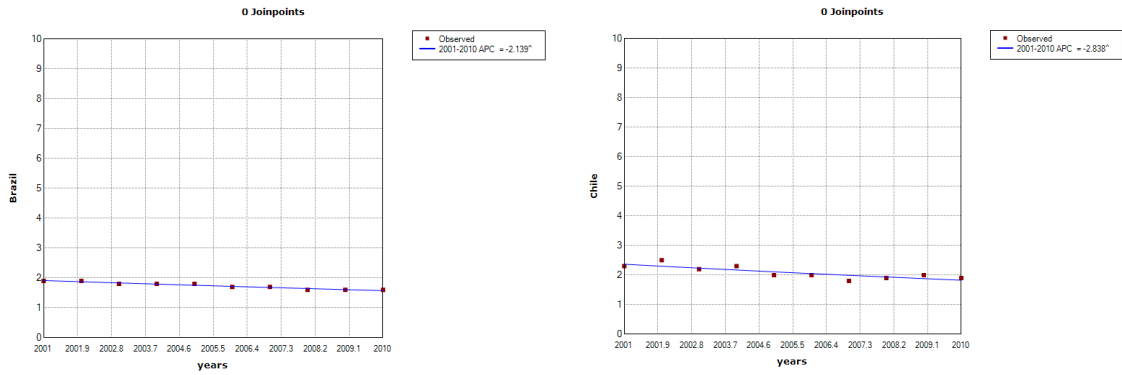



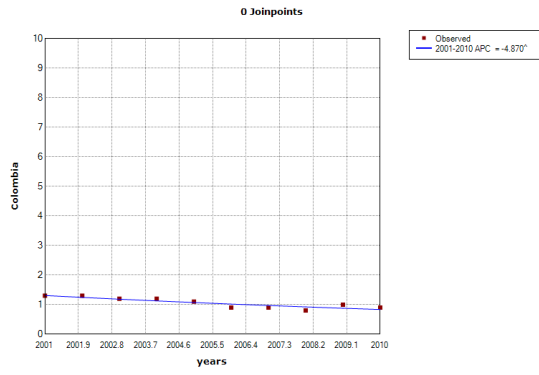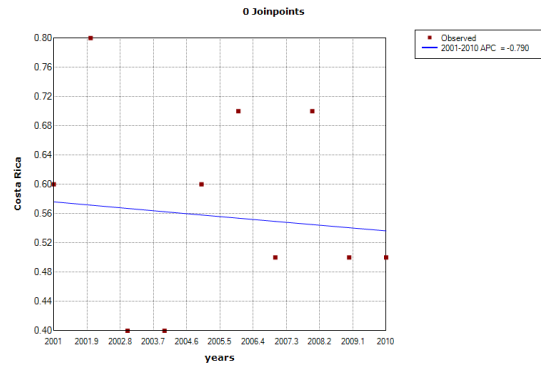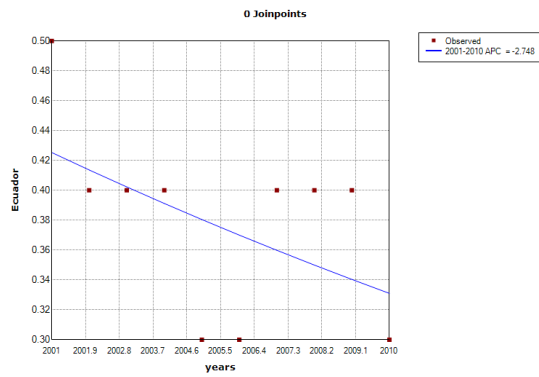

## Northern Europe

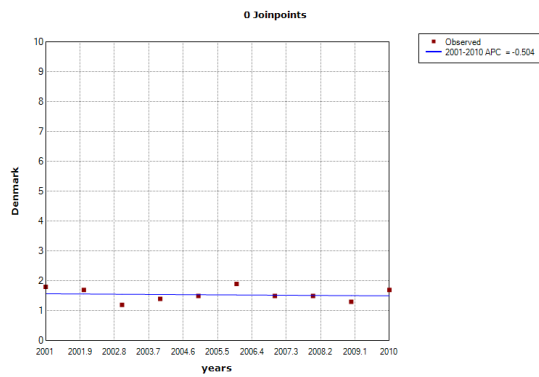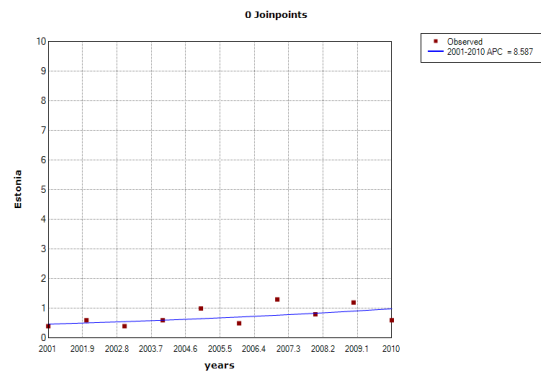

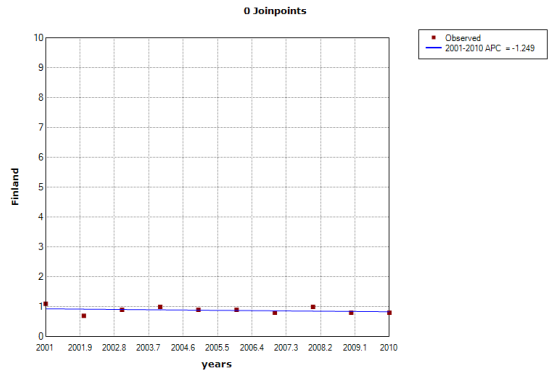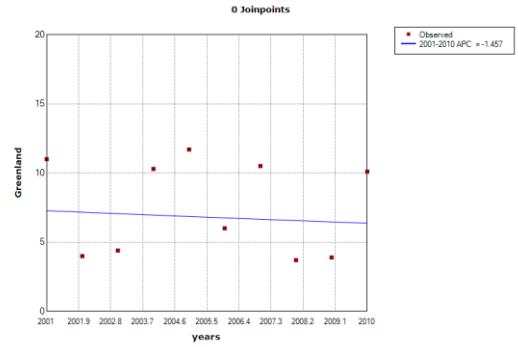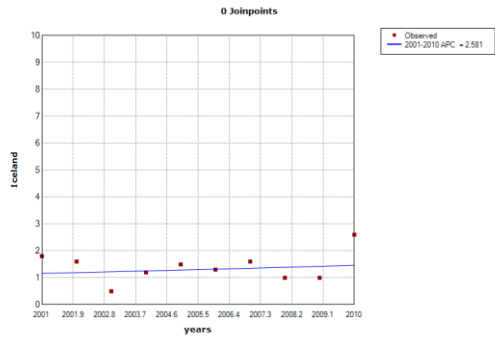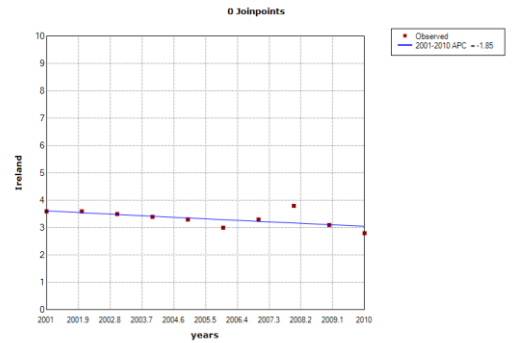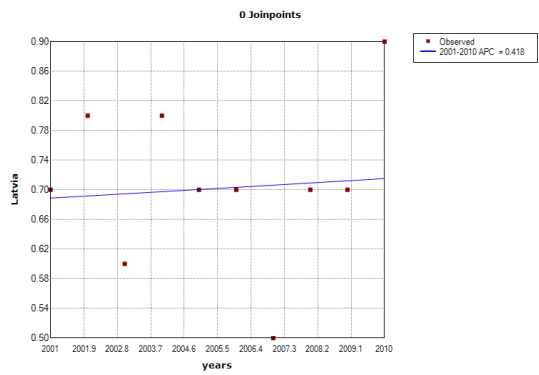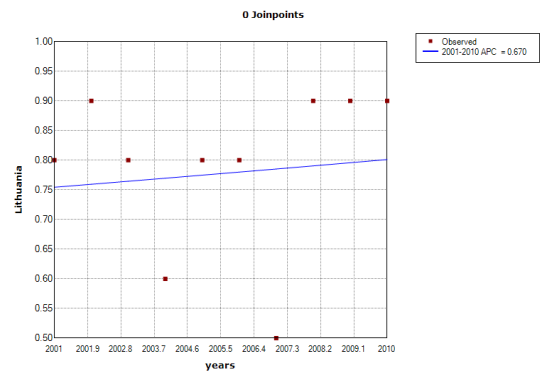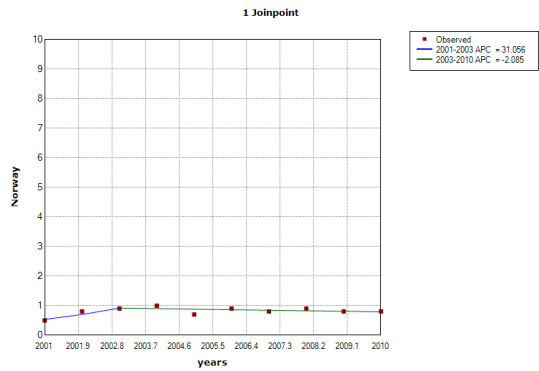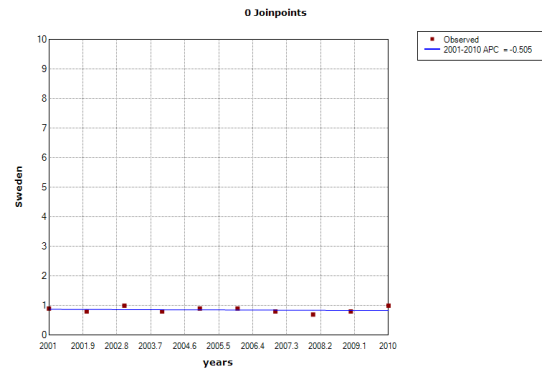

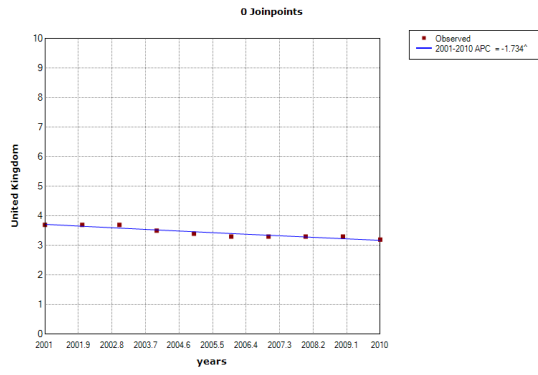

## Western Europe

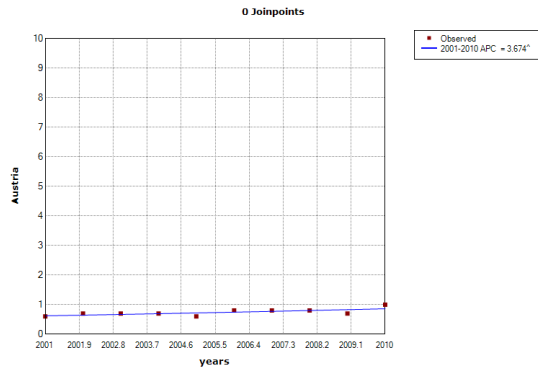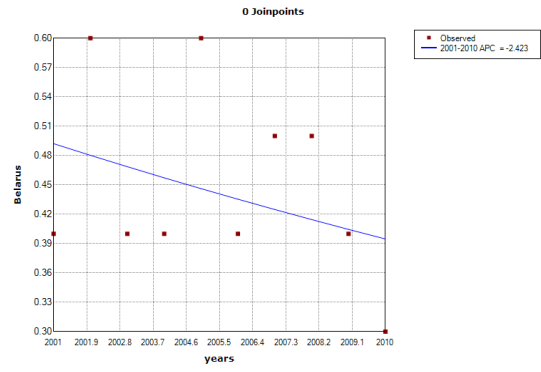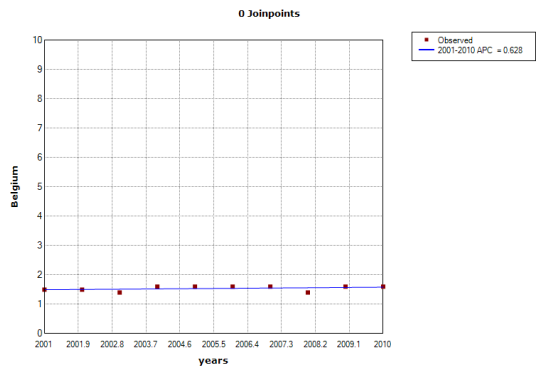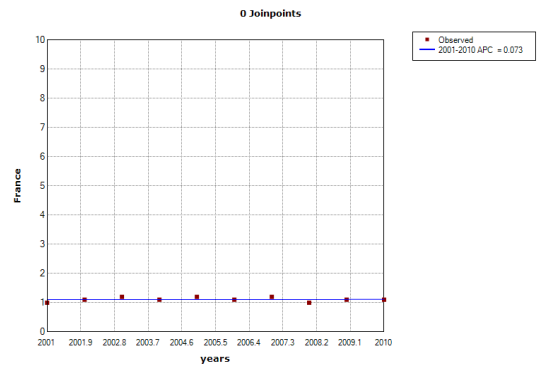

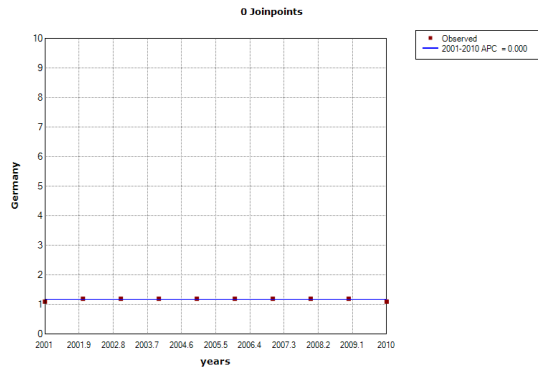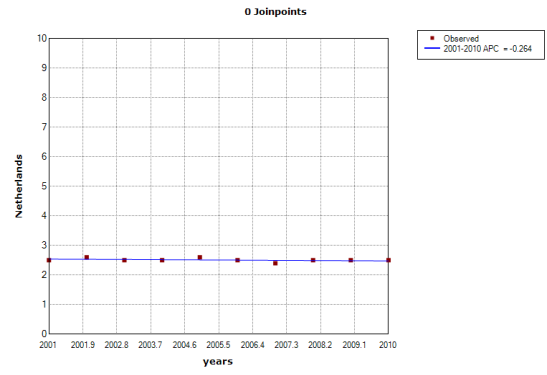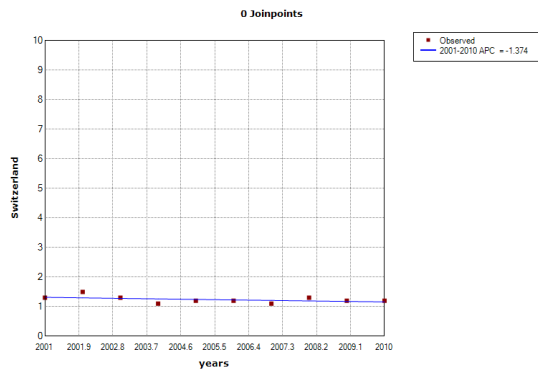

## Southern Europe

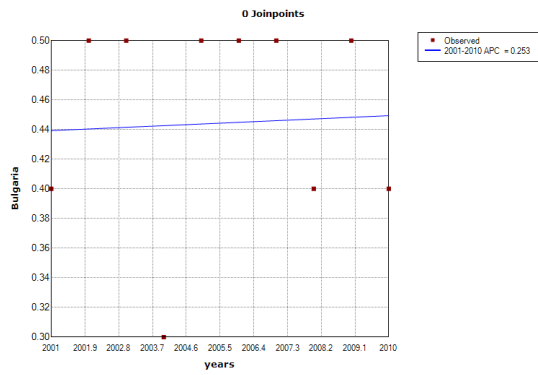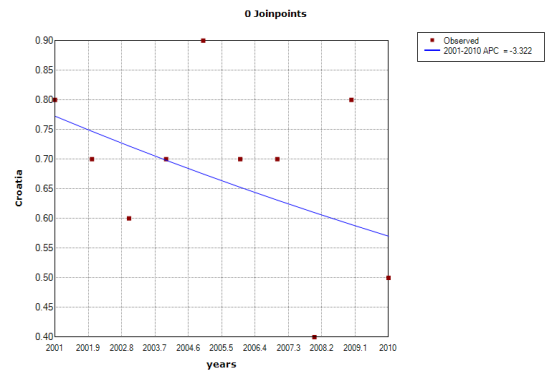

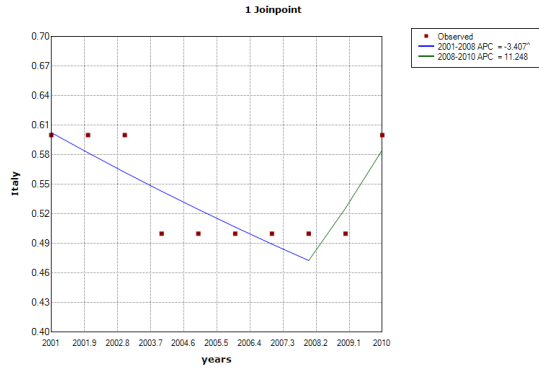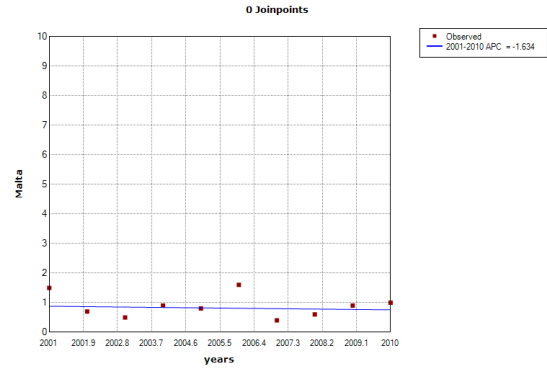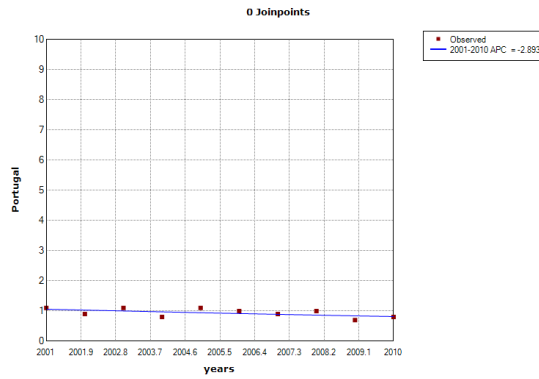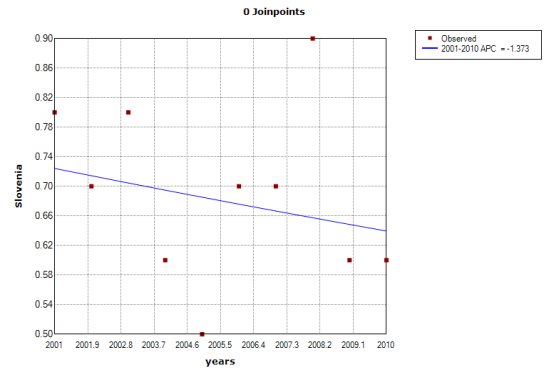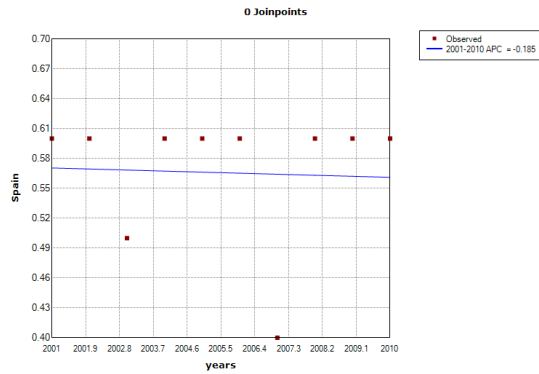

# Eastern Europe

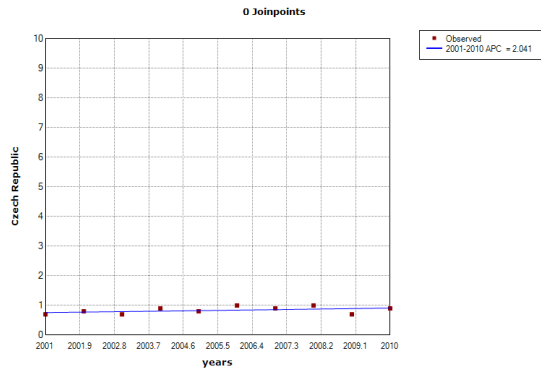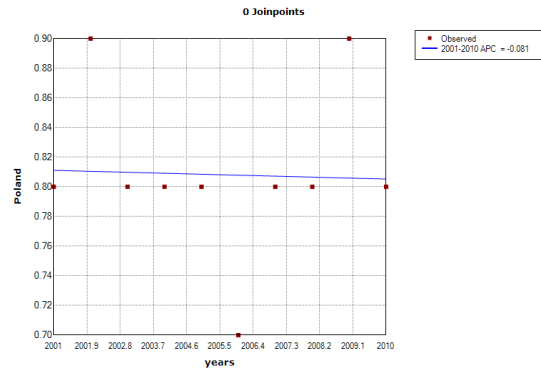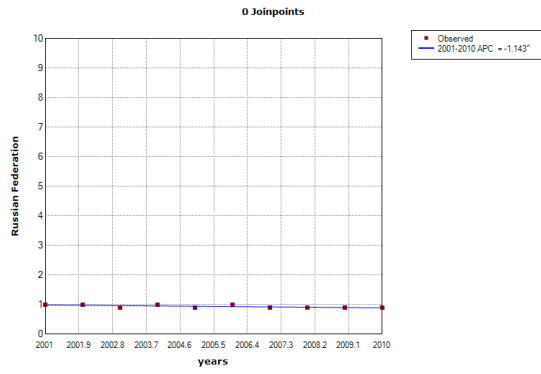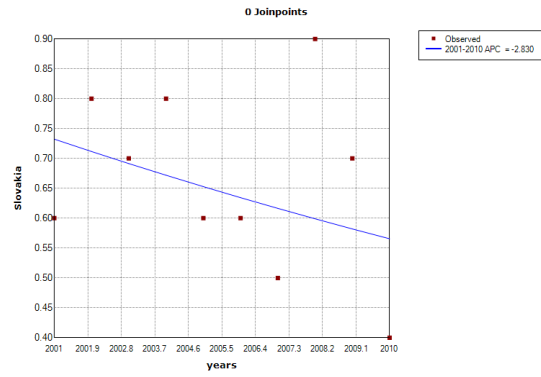

**Figure S3. The AAPC of the incidence of esophageal cancer in individuals aged < 50 years**

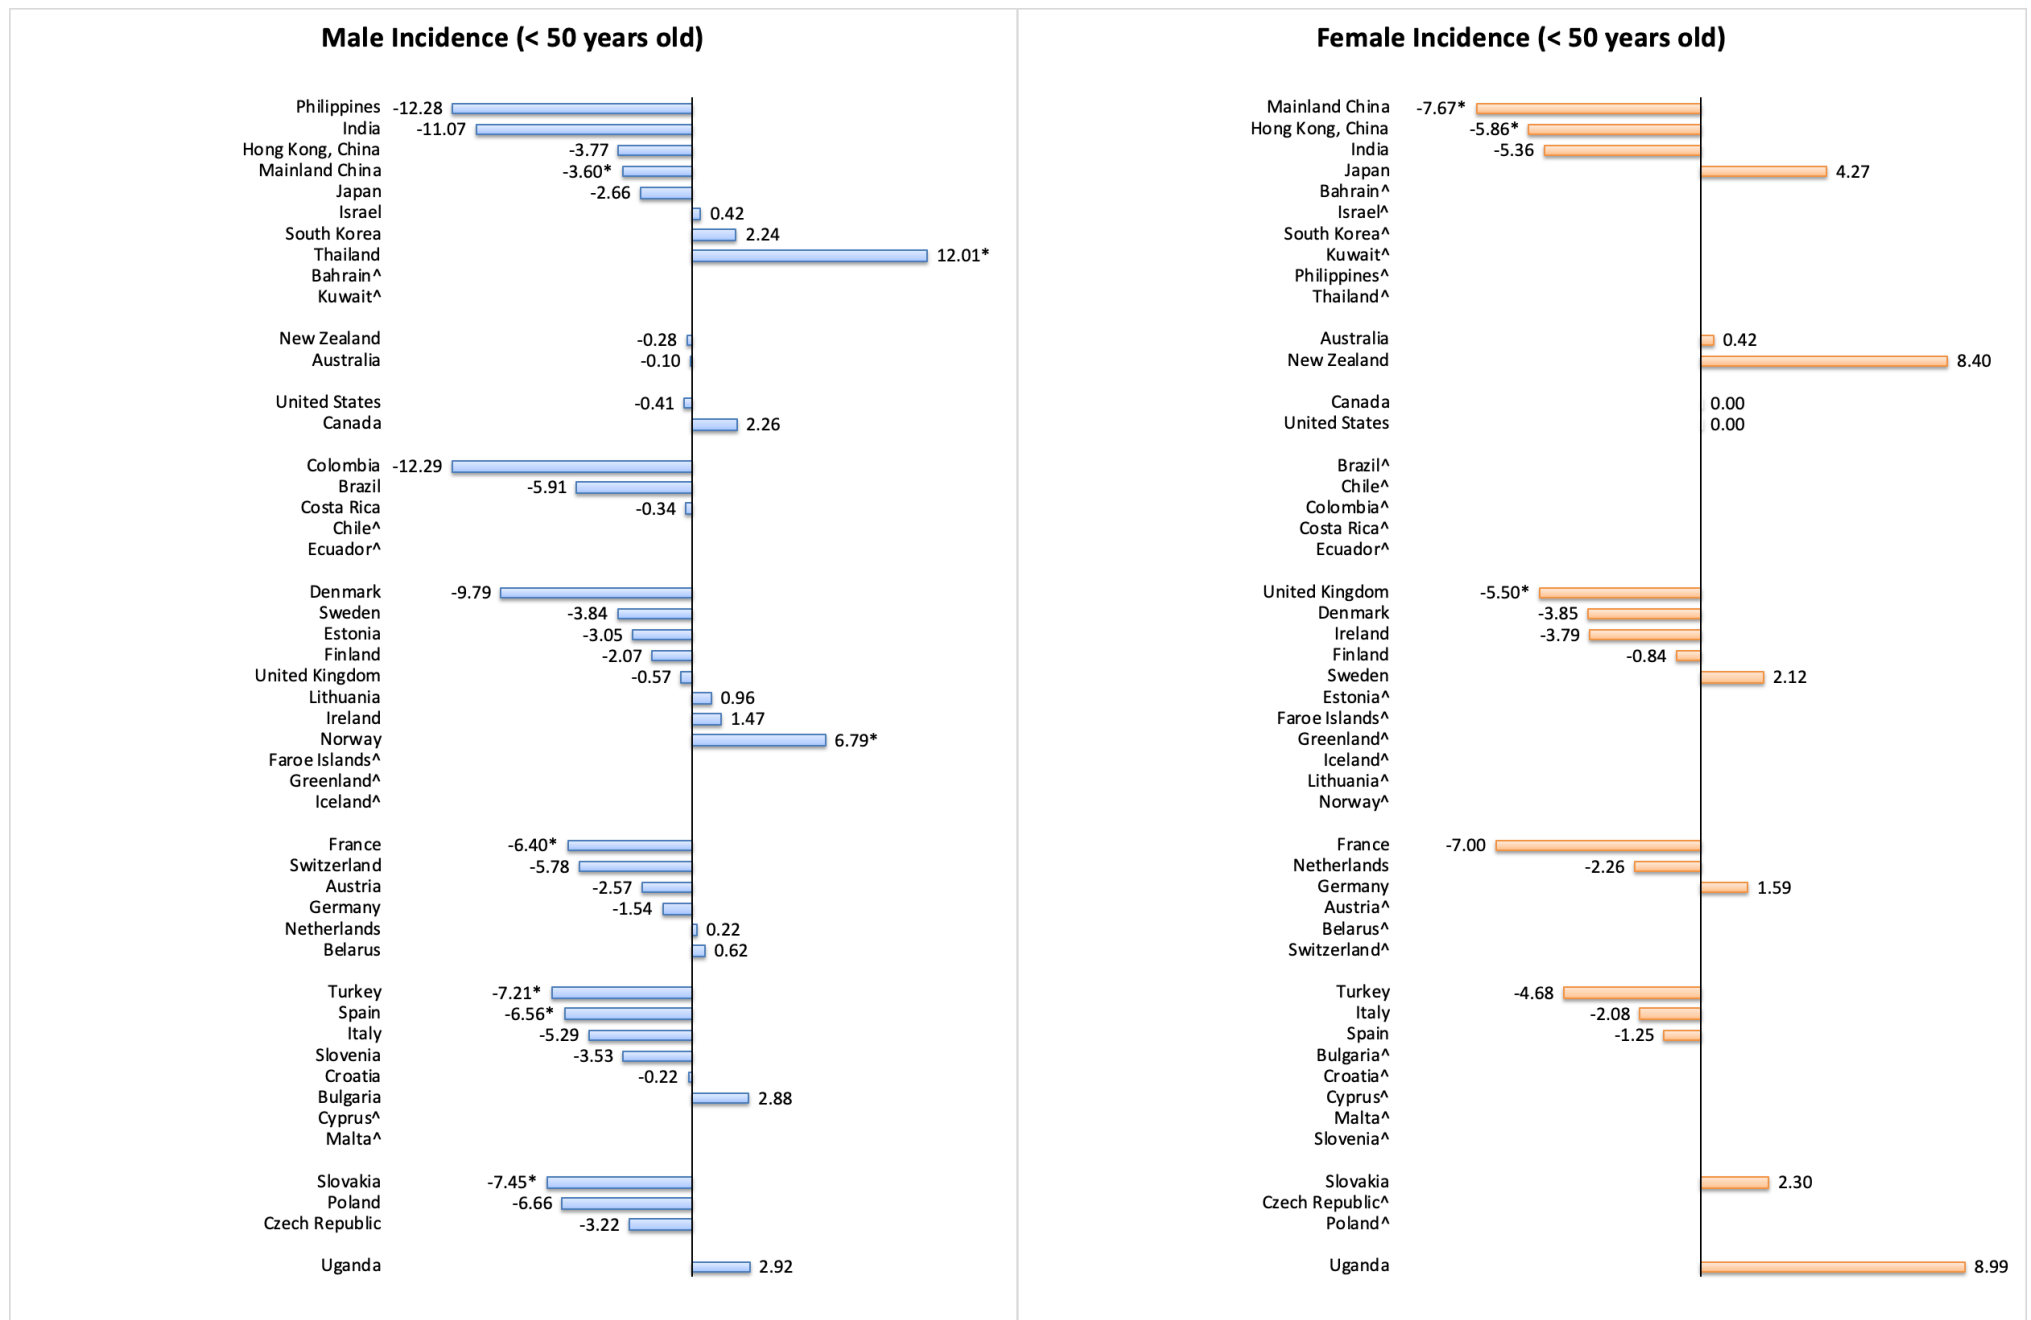

AAPC, annual percentage change; \**p* values less than 0.05; ^AAPC for these countries could not be generated as zero or missing values were identified in any year of trend analysis; The 95% confidence intervals and *p* values for the tests of AAPC were presented in Table S5.
